# Quantifying the Local Adaptive Landscape of a Nascent Bacterial Community

Joao A Ascensao<sup>1</sup>, Kelly M Wetmore<sup>2</sup>, Benjamin H Good<sup>3</sup>, Adam P Arkin<sup>1,2</sup>, and Oskar Hallatschek<sup>4</sup>

<sup>1</sup>Department of Bioengineering, University of California Berkeley, Berkeley, CA, USA

<sup>2</sup>Environmental Genomics and Systems Biology Division, Lawrence Berkeley National Laboratory, Berkeley, CA

<sup>3</sup>Department of Applied Physics, Stanford University, Stanford, CA, USA

<sup>4</sup>Departments of Physics and Integrative Biology, University of California Berkeley, Berkeley, CA, USA

1 The fitness effects of all possible mutations available to an organism largely shapes the dynamics of evolutionary adaptation. Tremendous progress has been made in quantifying the strength and abundance of selected mutations available to single microbial species in simple environments, lacking strong ecological interactions. However, the adaptive potential of strains that are part of multi-strain communities remains largely unclear. We sought to fill this gap by analyzing a stable community of two closely related ecotypes ("L" and "S") shortly after they emerged within the *E. coli* Long-Term Evolution Experiment (LTEE). We engineered genome-wide barcoded transposon libraries to measure the fitness effects of all possible gene knockouts in the coexisting strains as well as their ancestor, for many different, ecologically relevant conditions. We found that the fitness effects of many gene knockouts sensitively depends on the genetic background and the ecological conditions, as set by the abiotic environment and relative frequency of both ecotypes. Despite the idiosyncratic behavior of individual knockouts, we still see consistent statistical patterns of fitness effect variation across both genetic background and community composition. Genes that are in the same operon, or that strongly interact with each other, are more likely to be correlated with each other across backgrounds compared to random pairs of genes. Additionally, fitness effects are correlated with evolutionary outcomes for a number of conditions, possibly revealing shifting patterns of adaptation. Together, our results reveal how ecological and epistatic effects combine to drive adaptive potential in a nascent ecological community.

29 Experimental evolution | Barcoded transposon mutagenesis | Distribution of fitness effects | Eco-evolutionary dynamics | Fitness landscapes

31 Correspondence: [ohallats@berkeley.edu](mailto:ohallats@berkeley.edu)

## 32 Introduction

33 Microbial communities are ubiquitous across all environments, and are key players in disease processes, biogeochemical cycling, and ecosystem functioning (1–6). While most research on natural microbiomes has been fueled by their ecological significance, recent studies have begun to focus on microbial community evolution and uncovered clear signs of adaptation and diversification (7–10). Thus, microbiome assembly, structure, and function may have to be understood against a backdrop of an ever-churning evolutionary dynamics.

43 That evolutionary and ecological changes often go together has been most clearly shown in controlled experiments on synthetic microbial communities: evolution can change the

46 way microbes consume resources or otherwise interact with each other (11–15). This leads to environmental changes that modify selection pressures, forcing lineages into new evolutionary paths (16–21). Complex adaptive landscapes have been hypothesized to chiefly shape the feedback between ecology and evolution in microbial communities (19, 22), but it is still unclear how diversification and other ecological shifts change those landscapes.

54 In ecologically simple monoculture populations, population genetic theory has shown that the evolutionary dynamics are largely predictable from knowing local aspects of a static fitness landscape, encoding the fitness effects of all currently available mutations, which is called the "distribution of fitness effects" (DFE) (23–28). Such work has been successful in rationalizing and predicting outcomes of evolution experiments from DFE measurements (29, 30).

62 High-quality measurements of the DFE in a given system require sampling and measuring the fitness effects of sufficiently many mutations across the genome. This has only become possible recently, due to the rise of sequencing technologies. DNA barcoding systems have become especially influential to better understand microbial adaptive evolution. By taking advantage of amplicon sequencing methods to measure barcode frequency dynamics, these systems have been used with great success to directly observe evolutionary dynamics (30–33), and identify selected mutations and the statistical patterns that characterize them (34–39).

73 However, the concept of a *single, static* DFE may not be applicable or useful to describe a diversified population. It is possible that different ecotypes experience different adaptive landscapes, even if they are closely related, which moreover may shift in response to compositional or other ecological changes. Despite the importance of microbial communities, very little is known about how much the local landscape depends on biotic interactions with their coexisting strains versus genetic background alone, and how those patterns shift upon diversification.

83 Here we aim to elucidate the adaptive landscape of a microbial community by measuring how the invasion fitness effects of a large panel of mutations depends on the state of the ecosystem. Invasion fitness refers to the growth rate of a mutant relative to its ancestor when the mutant is rare in the population. To sample from the DFE, we create genome-wide knockout libraries via random-barcoded transposon mutagenesis (40, 41) on the backgrounds of the coexisting ecotypes.

91 While knockout mutations do not represent all possible mu-  
92 tations in the genome, this approach allows us to sample a  
93 wide variety of mutations across the genome and to com-  
94 pare the effect of the same mutation across different genetic  
95 backgrounds and community compositions. The resulting  
96 ecotype-, and composition-dependent DFE statistically char-  
97 acterizes the abundance and specificity of beneficial muta-  
98 tions and, thus, reveals how the rate and pattern of mutation  
99 accumulation depends on the state of the ecosystem.

100 We reasoned that the ecologically-dependent DFEs accessi-  
101 ble by our approach are particularly relevant to the fate of a  
102 recently diversified ecosystem, consisting of closely related  
103 ecotypes with overlapping niches. Additionally, quantifying  
104 the DFEs of such a nascent community would shed light on  
105 how the discovery and infiltration of a new niche changes  
106 the local adaptive landscape, in both focal and "nearby" en-  
107 vironments. The composition-dependence of the DFE would  
108 also provide information on the types of mutations avail-  
109 able to the community—"pure fitness" mutations would show  
110 minimal fitness changes in response to composition shifts,  
111 whereas frequency-dependent mutations may point to shifts  
112 in niche occupation/strategy. Theory suggests that the rela-  
113 tive availability of "pure fitness" versus frequency-dependent  
114 mutations may strongly influence the resulting evolutionary  
115 dynamics, but there have been few empirical measurements  
116 of how many mutations show frequency-dependent effects  
117 (19).

118 We therefore chose to focus on a model ecosystem that  
119 spontaneously emerged in the course of the *E. coli* Long  
120 Term Evolution Experiment (LTEE) – an experiment that has  
121 tracked the evolution of several *E. coli* populations over the  
122 course of over 70,000 generations (at the time of writing).  
123 Early in the LTEE, it was recognized that one of the twelve  
124 lineages, the *ara-2* population on which we focus in this  
125 study, spontaneously diversified into two lineages that coex-  
126 ist via negative frequency dependence, termed S and L (for  
127 their small and large colony sizes on certain agar plates) (42).  
128 S and L coexist by inhabiting different temporal/metabolic  
129 niches in the LTEE environment, set up as serial dilutions  
130 in glucose minimal media—L grows more quickly on glucose  
131 during exponential phase, while S specializes on stationary  
132 phase survival and utilizing acetate, a byproduct of overflow  
133 metabolism (43, 44). Following diversification, the lineages  
134 have persisted to this day and continued to evolve and adapt,  
135 diverging on genetic, transcriptional, and metabolic levels  
136 (16, 42–47). While our focal *ara-2* line is the best studied  
137 case of diversification in the LTEE, it is not the only one.  
138 Recent time-resolved metagenomic sequencing of the LTEE  
139 has shown that, in fact, 9 out of the 12 populations evolved  
140 two separate lineages that coexisted with each other for tens  
141 of thousands of generations, while continuing to accumulate  
142 mutations and adapt (47), demonstrating that spontaneous  
143 diversification followed by coevolution is a major adaptive  
144 route for this system.

## Results

**Measuring knockout fitness effects.** We sought to mea-  
146 sure the knockout fitness effects available to the small LTEE-  
147 derived ecosystem of S and L, and how they depend on eco-  
148 logical conditions, specifically, (i) the composition of the  
149 community, and (ii) openness of a given metabolic niche.  
150 To this end, we created randomly barcoded transposon li-  
151 braries of three LTEE clones, using previously developed  
152 methods (RB-TnSeq) (40, 41)—S and L clones sampled from  
153 6.5k generations, right after diversification (16, 42), and their  
154 LTEE ancestor, REL606 (Figure 1A). We used these libraries  
155 to measure the knockout fitness effects of nearly all non-  
156 essential genes in various environments relevant to the evolu-  
157 tion of the population in the LTEE (Table 1), by propagating  
158 the libraries in defined conditions (with two biological repli-  
159 cates per experiment) and using Illumina amplicon sequenc-  
160 ing to track the frequency trajectories of different barcodes  
161 (Figure 1B). By essentially measuring the log-slope of the  
162 frequency trajectories, we can estimate the fitness effect,  $s$ ,  
163 of a given mutant (Figure 1C), which we report in units of  
164  $1/\text{generation}$ . Transposon insertion events were highly re-  
165 dundant, with a median of  $\sim 20$  insertions per gene, allowing  
166 us to combine information from multiple barcode trajec-  
167 tories into one fitness measurement through our statistical fit-  
168 ness inference pipeline and identify significantly non-neutral  
169 mutations (FDR correction;  $\alpha = 0.05$ ). We carefully quanti-  
170 fied sources of error in barcode frequency measurements and  
171 propagated them to our fitness estimates, which was crucial  
172 to effective and accurate analysis of the data (see supplement  
173 section S3)—for example, we could exclude knockouts with  
174 overly noisy fitness measurements, or weight measurements  
175 by their error.

176 Barcoded transposon mutagenesis has been successfully and  
177 consistently used to measure knockout fitness effects across  
178 many contexts (40, 41), but as the knockouts are not bonafide  
179 deletions, it is possible that some genes with transposon in-  
180 sertions retain some activity. However, the fact that we have  
181 multiple transposon insertions spread across the length of  
182 each gene, along with our outlier barcode detection scheme,  
183 allows us to be more confident that our fitness measurements  
184 are dominated by the typical effects of an insertion.

185 After inferring the fitness effect of each gene knockout, we  
186 can compare fitness effects across genetic backgrounds and  
187 environments. We can first look at knockout fitness effects in  
188 the evolutionary condition proxies—the closest approximation  
189 to the environment where evolution in the LTEE took place:  
190 the REL606 library in monoculture, and S and L libraries  
191 together, coexisting at the ecological equilibrium frequency.  
192 We chose to highlight the condition where S and L were co-  
193 existing at their ecological equilibrium to be able to distin-  
194 guish environmental versus genetic contributions to fitness  
195 effects—the libraries were cocultured together, in the same  
196 flasks, thus experiencing the same environment. In cocul-  
197 ture experiments, the S/L libraries are mixed in the minority  
198 together with wild-type S/L clones at the desired frequency  
199 (see supplement section S2). The ecotype frequencies do not  
200 change considerably over the time period considered (Figure  
201



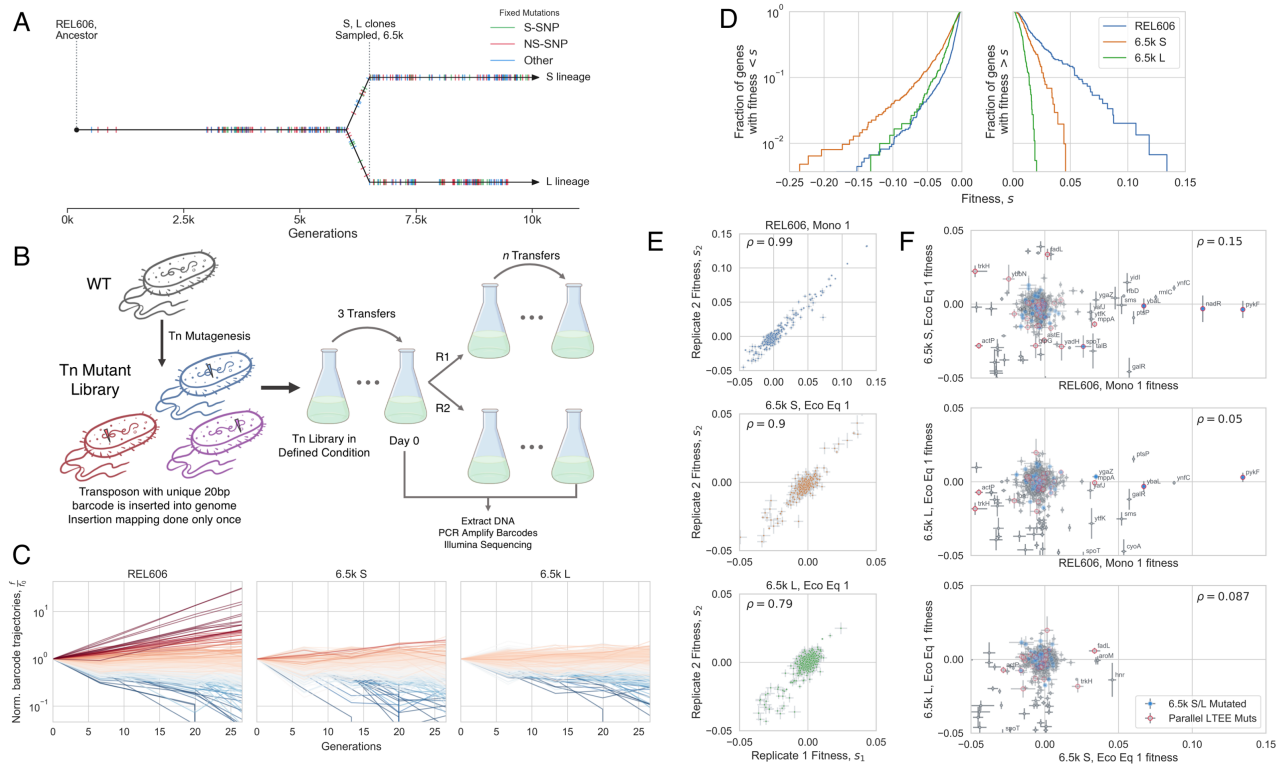

**Fig. 1. Measuring mutational fitness effects.** (A) Timeline of evolution in the *ara-2* LTEE population, showing mutation accumulation and diversification into S and L around 6k generations, then clone sampling at 6.5k generations; data from (47), jitter added to mutation fixation time for easier visualization. Hypermutator phenotype appeared around 2.5k generations (48). (B) Schematic of transposon mutagenesis process to generate barcoded libraries of REL606, 6.5k S and L, as well as experimental procedure to observe barcode dynamics. (C) Barcoded knockout mutant frequency trajectories in the evolutionary condition for each genetic background, colored by estimated fitness. All barcodes within a gene were summed together; shown are the trajectories from replicate 1 in the evolutionary condition for each genetic background (monoculture for REL606, together at ecological equilibrium frequency for S and L; representative of both replicates). (D) Overall distributions of fitness effects in the evolutionary condition for each genetic background. The majority of knockouts were neutral, so only genes that were called as significantly non-neutral were included (see supplement section S3.2). (E) Replicate-replicate correlation of estimated fitness effects. (F) Comparison of knockout fitness effects across genetic backgrounds, which are generally uncorrelated. Points with a blue interior correspond to genes that were mutated (excluding S-SNPs) in 6.5k S/L relative to REL606 (sequencing data from (46)). Points with red outlines correspond to genes that were mutated in parallel in nonmutator LTEE populations (data from (47)). The correlation coefficients decrease slightly if we recompute them, excluding likely neutral genes ( $\rho = 0.14, 0.03, 0.03$ ; top to bottom). In panels E-F, knockouts with high measurement noise ( $\sigma_s > 0.3\%$ ) were excluded (except for labeled genes), and  $\rho$  is the weighted Pearson correlation coefficient. Also in panels E-F, the "cloud" of points around 0 mostly represents likely neutral knockouts.

S7).

If we look at the overall DFE in the evolutionary condition proxies, we see that REL606 has access to beneficial knockouts of much larger effect size than either S or L (Figure 1D), suggesting that REL606 would adapt much quicker than S or L. Additionally, S has a larger beneficial DFE compared to L, which may be because S is starting to exploit an under-utilized niche (acetate specialization), where more significant gains can be made by improving the exploitation of the niche. On the other hand, L has inherited the putative old niche (glucose specialization), which was presumably the primary target of adaptation during the first ~6k generations of evolution. As previously mentioned, the overall shape of the DFE largely controls the instantaneous speed of adaptation (23–28). The evolutionary tendency towards a "shrinking DFE" is known as global diminishing returns epistasis, which has previously been proposed as a mechanism to explain the decelerating fitness trajectories of the LTEE populations (49, 50). While diminishing returns epistasis was previously observed to affect the first couple common LTEE mutations (51), global diminishing returns (affecting the whole DFE) after the accumulation of many mutations had not yet been directly observed.

We can also compare the fitness effects of each knockout mutation both between replicates and across genetic backgrounds (Figure 1E-F), to contrast within-sample to between-sample variance. In contrast to a strong replicate-replicate correlation, we see that fitness effects are largely uncorrelated between genetic backgrounds. It may be unsurprising that mutational effects of S and L are uncorrelated with those of their ancestor, as REL606 may be creating and experiencing a slightly different environment compared to S and L, even though they were all started in the same media. However, as previously mentioned, we measured the fitness effects of S and L while they were coexisting in the same flasks, so the two ecotypes were experiencing the exact same environment. Thus, the lack of correlation between the fitness effects of S and L must be due to epistatic effects. It appears that individual mutations behave idiosyncratically despite statistical patterns of epistasis, in contrast with previous experiments (51, 52) which saw diminishing returns both globally and with individual mutations. Most knockout mutations that were strongly beneficial in REL606 and then acquired a mutation in that gene in the 6.5k S/L background became effectively neutral when knocked out in S/L (*nadR*, *pykF*, *ybaL*, *ygaZ*); it makes sense that mutating a gene

248 that was already mutated (with a fitness effect) wouldn't have  
249 an effect, if the mutation was effectively a loss-of-function.  
250 One gene, *spoT*, was beneficial in REL606 but deleterious  
251 in both S and L when knocked out, indicating that the natu-  
252 ral *spoT* SNP may represent a change-of-function rather than  
253 a loss-of-function mutation. However, the majority of se-  
254 lected genes in REL606 were not mutated between 0 and 6.5k  
255 generations in S/L, so the fact that their fitness effects sig-  
256 nificantly changed across genetic background implicates the  
257 role of widespread, global idiosyncratic epistasis. Further-  
258 more, there are several genes that were mutated in parallel in  
259 multiple lines of the LTEE, but are only beneficial on the S  
260 background (*trkH*, *ybbN*) or both the S and L backgrounds  
261 (*fadL*) when knocked out, while being neutral or deleterious  
262 on the REL606 background, suggesting that predictable epis-  
263 tasis could have shaped which mutations became beneficial  
264 in the LTEE. 'Coupon collection' is a null model of muta-  
265 tion accumulation/epistasis, where a beneficial DFE is com-  
266 posed of a finite number of mutations, and only changes due  
267 to the depletion of those mutations when they fix in a pop-  
268 ulation. While the coupon collecting model is clearly rele-  
269 vant for some mutations, the lack of fitness effect correlation  
270 between genetic backgrounds seems to be largely driven by  
271 global epistasis.

272 As a simple check, we compared the fitness effect of one of  
273 the largest effect knockouts in our collection, *pykF*, to pre-  
274 viously collected data. We reanalyzed data from Peng et  
275 al. (2018) *Mol Biol Evol* (53) (to recalculate fitness using  
276 the metric that we use) and found that their *pykF* deletion  
277 mutant had a selective coefficient  $s \approx 4\%$ , compared to our  
278 measurement  $s \approx 12\%$ ; the highest fitness effect of a *pykF*  
279 nonsynonymous mutation on the ancestral background was  
280  $s \approx 9\%$ , which is similar to our measurement. Additionally,  
281 our measured fitness effect of *pykF* is quite consistent—it is  
282 approximately the same across all replicates in the Mono 1  
283 and 2 experiments in REL606 (performed on different days).  
284 And all of the individual barcodes that landed in *pykF* appear  
285 to have approximately the same slopes. One possibility to  
286 describe the discrepancy could be the presence of frequency  
287 dependent fitness effects—the strength of selection may be  
288 higher when the mutant is rare (as is the case in our data),  
289 compared to when it occupies a sizable portion of the popu-  
290 lation (as in Peng et al. 2018). Another possibility could be  
291 that transposon insertions did not completely eliminate *pykF*  
292 activity, as it would in a deletion.

293 **Knockout fitness effects strongly depend on ecologi-**  
294 **cal conditions.** The ecological interactions between S and  
295 L are mediated through the environment, most likely pri-  
296 marily through cross-feeding (43, 44). Therefore, it's reason-  
297 able to think that the environment will change with the  
298 ecosystem composition, which could be modified by both  
299 ecological and evolutionary processes—indeed, ecotype com-  
300 position does change significantly and relatively rapidly over  
301 evolutionary time (~1k-10ks generations) (42, 47). Thus, we  
302 sought to explore how mutational fitness effects varied with  
303 ecosystem composition (Figure S7). Notably, we see a con-  
304 sistent trend where fitness effects generally have a smaller

305 magnitude when S and L are in monoculture compared to  
306 when they are in coculture (Figures 2A, S11A). Addition-  
307 ally, we also see that the overall shape of the DFEs change  
308 as a function of frequency, with generally larger fitness ef-  
309 fects when the ecotype is in the minority, for both beneficial  
310 and deleterious knockouts (Figures 2B, S11B). Analogous to  
311 the case of global diminishing returns epistasis, this observa-  
312 tion holds on a statistical level, but does not explain all of the  
313 fitness effect variation between the different conditions, im-  
314 plying that individual mutations are affected by the ecosys-  
315 tem composition in idiosyncratic ways—statistical properties  
316 of the DFE seem to be strongly dependent on the ecosys-  
317 tem composition, but the effects of individual mutations may  
318 depend on their underlying physiological consequences and  
319 how they affect ecological interactions. Thus, it appears that  
320 the impact of both ecotypes on the environment is different  
321 enough to make selection pressures strongly dependent on  
322 the current mixture of ecotypes.

323 The LTEE environment, while relatively simple, varies quite  
324 significantly over the course of a single cycle (43, 54), allow-  
325 ing ecotypes to carve out different temporal ecological niches  
326 during cycles of lag, exponential, and stationary phases. To  
327 explore how selection pressures vary in different niches in  
328 the growth cycle, we measured fitness in exponential growth  
329 on glucose and acetate (which appears in the LTEE environ-  
330 ment due to overflow metabolism), and at a reduced dilution  
331 rate of 1:10 such that portion of the growth cycle in station-  
332 ary phase is increased (Table 1). We found that the shape  
333 of the DFE changed substantially based on the environment  
334 (Figures 2B). For example, while S and L have a similar ben-  
335 efiticial DFE shape in monoculture, L has access to stronger  
336 beneficial knockout mutations in glucose exponential phase  
337 compared to S. As another example, the beneficial DFE in ac-  
338 etate is larger than any other DFE in both S and L, potentially  
339 pointing to a substantial, as-of-yet unrealized adaptive poten-  
340 tial for adaptation on acetate. Interestingly, despite the envi-  
341 ronmental variation, REL606 always has a more pronounced  
342 beneficial DFE compared to S and L.

343 It is important to note that measurement noise varied non-  
344 negligibly across experiments, primarily because of changes  
345 in bottleneck size (and thus in the strength of genetic drift)  
346 due to differences in library frequency and and other exper-  
347 imental differences (see supplement section S2). Thus, our  
348 power to detect selected mutations close to neutrality varied  
349 across experiments.

350 In contrast to previous work (35), it appears that there is  
351 no consistent relationship between background fitness and  
352 shape of the deleterious DFE, which instead appears to de-  
353 pend more on environment. Possible reasons for the discrep-  
354 ancy include species-dependent differences, and the fact that  
355 our set of experiments used backgrounds connected by evolu-  
356 tion, while Johnson et al. used evolutionarily unrelated yeast  
357 hybrids with varying fitness in the test environment, whose  
358 changing DFEs were not controlled by evolution. One possi-  
359 ble evolutionary explanation could be second-order selection  
360 against mutants with wider deleterious DFEs, because those  
361 mutants would be more likely to pick up a deleterious hitch-

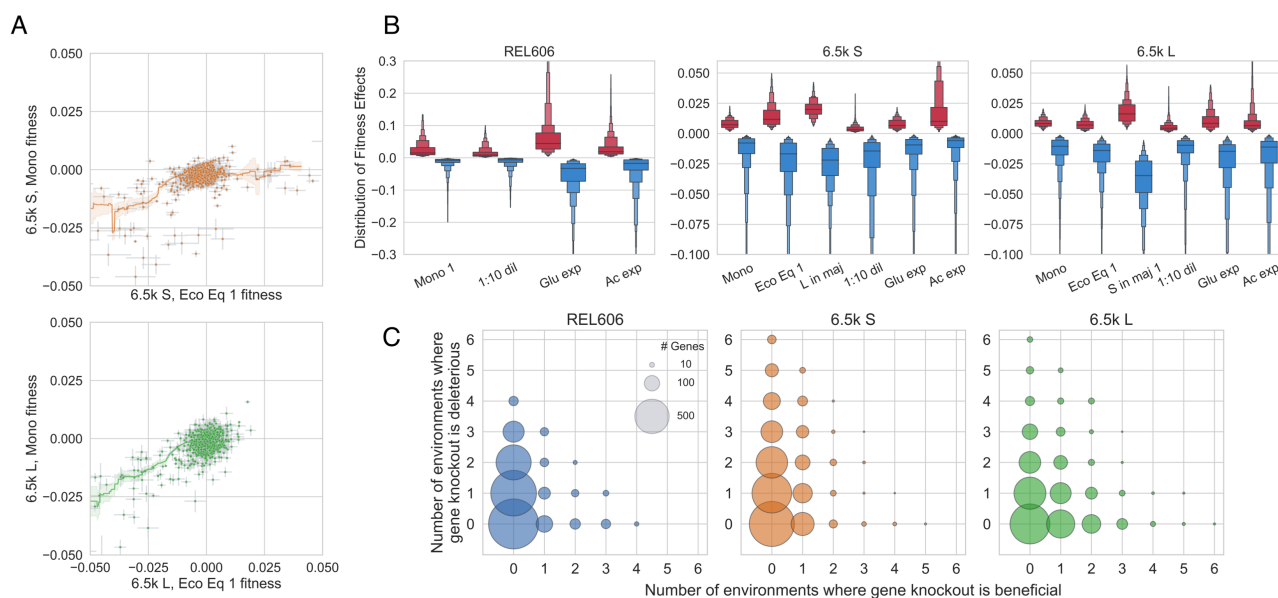

**Fig. 2. Statistical properties of DFEs as well as effects of individual mutations sensitively depend on environment.** (A) Knockout fitness effects tend to have a larger magnitude when S and L are at ecological equilibrium versus when they are in monoculture. Line shown is a rolling average of fitness effects  $\pm$  standard error. (B) Distribution of fitness effects across environments, where we only included knockouts that were called as significantly non-neutral. Please note that the DFEs of REL606 are on a different scale than S and L. (C) Illustration of how the sign of fitness effects changes across environments. Few mutations are unconditionally beneficial or deleterious, many are non-neutral only in one or few environments, and sign-flipping of fitness effects across environments is pervasive. REL606 only has 4 unique environments, compared to 6 for S and L. Size of circle is proportional to number of genes that fall into each class.

| Experiment | Libraries | Same flasks? | Description                                            | $\langle f_S \rangle$ |
|------------|-----------|--------------|--------------------------------------------------------|-----------------------|
| Mono       | R, S, L   | N            | Library monoculture                                    |                       |
| 1:10 dil   | R, S, L   | N            | Library monoculture, 1:10 daily dilution               |                       |
| Glu exp    | R, S, L   | N            | Library monoculture, kept in glucose exponential phase |                       |
| Ac exp     | R, S, L   | N            | Library monoculture, kept in acetate exponential phase |                       |
| Eco Eq 1   | S, L      | Y            | S + L libraries with wt L at ecological equilibrium    | 0.15                  |
| Eco Eq 2   | S         | N            | S library with wt S + L at ecological equilibrium      | 0.17                  |
| Eco Eq 2   | L         | N            | L library with wt S + L at ecological equilibrium      | 0.21                  |
| L in maj   | S         | N            | S library with wt L in majority                        | 0.08                  |
| S in maj 1 | L         | N            | L library with wt S in majority                        | 0.97                  |
| S in maj 2 | S, L      | Y            | S + L libraries with wt S in majority                  | 0.98                  |
| S in maj 3 | L         | N            | L library with wt S in majority                        | 0.97                  |

**Table 1.** Summary of BarSeq experiments reported in this work. Dilution rate was variable in the glucose/acetate exponential phase experiments, to keep the populations in exponential phase (see supplement section S2), but unless otherwise noted, the daily dilution rate was 1:100, consistent with the LTEE condition. All experiments were performed in the LTEE media, DM25, except for the acetate exponential phase experiment. The abbreviations R, S, and L refer to REL606, and 6.5k S/L, respectively. In coculture experiments,  $\langle f_S \rangle$  is the total frequency of S, averaged over all time points and replicates.

362 hiker mutation along with any beneficial driver mutation.  
 363 In addition to the strong dependence of the macroscopic  
 364 DFE on environment, it appears that the fitness effects of  
 365 individual mutations can also change radically by environ-  
 366 ment. Strikingly, in the set of considered environments,  
 367 conditional non-neutrality and sign-flipping appear to oc-  
 368 cur across all three genetic backgrounds (Figure 2C). The  
 369 majority of knockouts are non-neutral in at least one mea-  
 370 sured environment; just about ~20% of knockouts are called  
 371 as neutral across all environments. Very few mutations are  
 372 unconditionally beneficial or deleterious across all environ-  
 373 ments, and many more mutations flip signs across environ-  
 374 ments, suggesting the presence of widespread trade-offs be-  
 375 tween adapting to different components of an environment.  
 376 The ubiquitous presence of sign-flipping also suggests that  
 377 subtle changes to environmental conditions—by changes to

community composition or niche openness via adaptation—  
 could meaningfully affect evolutionary outcomes by chang-  
 ing which mutations are likely to establish. The presence of  
 sign-flipping still holds if we reduce the p-value cutoff from  
 0.05 to  $10^{-3}$  or  $10^{-5}$  to determine non-neutrality (Figure  
 S12), or only consider genes with  $|s| > 1\%$  or  $|s| > 2\%$  as  
 non-neutral (Figure S13), although more genes are called as  
 neutral, as would be expected. However, it is important to  
 note that we only considered genes to be non-neutral if their  
 fitness was significantly different from 0; thus, it is likely  
 that some knockouts were incorrectly called as neutral, espe-  
 cially if their fitness effect is small. Additionally, we have  
 only measured a relatively small set of closely related envi-  
 ronments "nearby" the LTEE environment, so we might ex-  
 pect that if we measure fitness in a sufficiently large number  
 of environments, many more genes would be non-neutral in



394 at least one.  
395 By computing the correlation of mutational fitness effects  
396 across environments (weighted by measurement error), we  
397 can obtain a measure of the functional similarity of environ-  
398 ments, which we can also use to cluster said environments  
399 (Figure 3A). As a first observation and check, it is reassuring  
400 to see the clustering of quasi-replicate experiments, i.e.  
401 experiments with relatively minor differences in the experi-  
402 mental set-up and performed on different days—Eco Eq 1/2,  
403 S in maj 1/2/3 (L), and Mono 1/2 (REL606) (see supplement  
404 section S2). However, the correlations between the quasi-  
405 replicates are lower than we see for replicate experiments that  
406 we did at the same time—this could indicate either that some  
407 fitness measurements are sensitive to the small experimental  
408 differences (size of flasks, whether libraries are cocultured  
409 or not, etc.), or simply performing the experiments on dif-  
410 ferent days with different environmental fluctuations leads to  
411 deviations in measured fitness, as is perhaps the case in other  
412 systems (37). The latter hypothesis is further supported by  
413 the fact that two experiments were in fact performed at the  
414 same time (S in maj 2 and 3), and had among the highest  
415 correlation of all quasi-replicates.  
416 Otherwise, there are still some interesting patterns that we  
417 can pick out by looking at correlations across environments.  
418 For example, it looks like the environments related to the pu-  
419 tative ecotype niches—glucose and acetate exponential growth  
420 in L and S respectively—cluster with conditions where the  
421 ecotype is in the minority. On the other hand, the monocul-  
422 ture experiment in S clusters with glucose exponential phase.  
423 Also, in REL606 and L, the acetate experiment is the out-  
424 group compared to all the other environments, and almost  
425 completely uncorrelated with fitness in glucose exponential  
426 phase, but most correlated with the 1:10 dilution condition.  
427 In S, this is not the case, and acetate fitness is *least* correlated  
428 with 1:10 dilution fitness. This may indicate that stationary  
429 phase in REL606 and L may have much more acetate with  
430 which to grow on compared to S, and adaptation to acetate  
431 may involve tradeoffs with adaptation to glucose, at least in  
432 REL606 and L. We also performed a principal components  
433 analysis on our data, using (normalized) fitness effects as fea-  
434 tures (Figure 3B). We see that L experiments cluster sepa-  
435 rately from the S and REL606 experiments, with the excep-  
436 tion of the acetate exponential phase condition. Otherwise,  
437 the PCA largely reproduces the insights from the previous  
438 correlation clustering analysis.

439 **Correlations between genes across environments.** To  
440 explore the nature of the strong background dependence that  
441 we observed, we sought to understand which genes are corre-  
442 lated with each other across environments, with the intuition  
443 that genes that perform the same function should change their  
444 fitness effects across environments in similar ways. For ex-  
445 ample, the *sufABCDE* operon encodes proteins that help to  
446 assemble iron-sulfur clusters (56), and they all have corre-  
447 lated knockout fitness effects across environments in all three  
448 genetic backgrounds (Figure S15A)—as they should, if the  
449 knockouts all have very similar metabolic/ physiological con-  
450 sequences. However, other gene sets are only correlated in a

subset of backgrounds. Most genes in the *fecABCDE* operon  
are correlated with each other in all backgrounds except for  
*fecA*, which is well correlated with the others in REL606,  
less correlated in S, and uncorrelated with the others in L  
(Figure 4A). Similarly, the genes in the *proVWX* operon are  
almost perfectly correlated, except one condition where *proV*  
has a ~7% higher fitness than the other two knockouts (Fig-  
ure S15B). We can also look at the fitness effects of a sub-  
set of knockouts that are beneficial at least once for every  
genetic background, across environments (Figure S16). We  
see that subsets of genes that are sometimes beneficial on  
a background are positively correlated with each other, e.g.  
*pykF/cyoA* in REL606 and *ptsP/mrcA/gppA* in 6.5k L, per-  
haps suggesting that the knockouts have common functional  
effects. These correlations often break when the mutations  
appear on different genetic backgrounds, e.g. *pykF/cyoA* are  
no longer correlated on (at least) the 6.5k L background,  
and *ptsP/mrcA/gppA* are no longer correlated on the 6.5k S  
background, while *ptsP/mrcA* actually appear *negatively* cor-  
related on the REL606 background. Together, these exam-  
ples suggest that correlations between knockout fitness ef-  
fects may change in idiosyncratic ways across genetic back-  
grounds.

We systematically quantified the pairwise correlation of  
knockout fitness across environments—termed "cofitness",  
previously defined in (41)—where we used the weighted pear-  
son's correlation coefficient to account for differences in  
measurement error across environments. We computed the  
cofitness of all pairs of genes (excluding those called as neu-  
tral across all environments) across the REL606, S and L li-  
braries, as well as a null cofitness distribution for each pair  
to determine if the two genes are significantly correlated;  
the set of all significant gene-gene correlations determine  
the edges in the cofitness networks (see supplement section  
S4.2). We explored the structure of the resulting cofitness  
networks via clustering (55) (see supplement section S4.2),  
where we found sets of communities for all three libraries  
with *modularity* > 0, indicating that there are more edges  
within each community than between communities (Figure  
4B) (57). We performed a number of controls to ensure that  
our results weren't driven by measurement noise or technical  
effects of clustering; see supplement section S4.2 for more  
information.

The presence of strong communities suggests that most  
knockouts are significantly correlated with others, potentially  
pointing to similar functional effects driving changes in fit-  
ness. We then wanted to compare how these clusters differ  
between the different genetic backgrounds, with the idea that  
how and if clusters change should reveal information on how  
the effective functions of genes differ across genetic back-  
grounds. Surprisingly, we find that gene clusters are not  
well preserved across genetic backgrounds, and in fact, genes  
are typically seemingly randomly reassorted between genetic  
backgrounds (Figures 4B, S21). In further support of corre-  
lations breaking between backgrounds, if we recompute the  
cofitness networks using only one of the biological replicates  
per experiment, we see that cofitness networks are more sim-

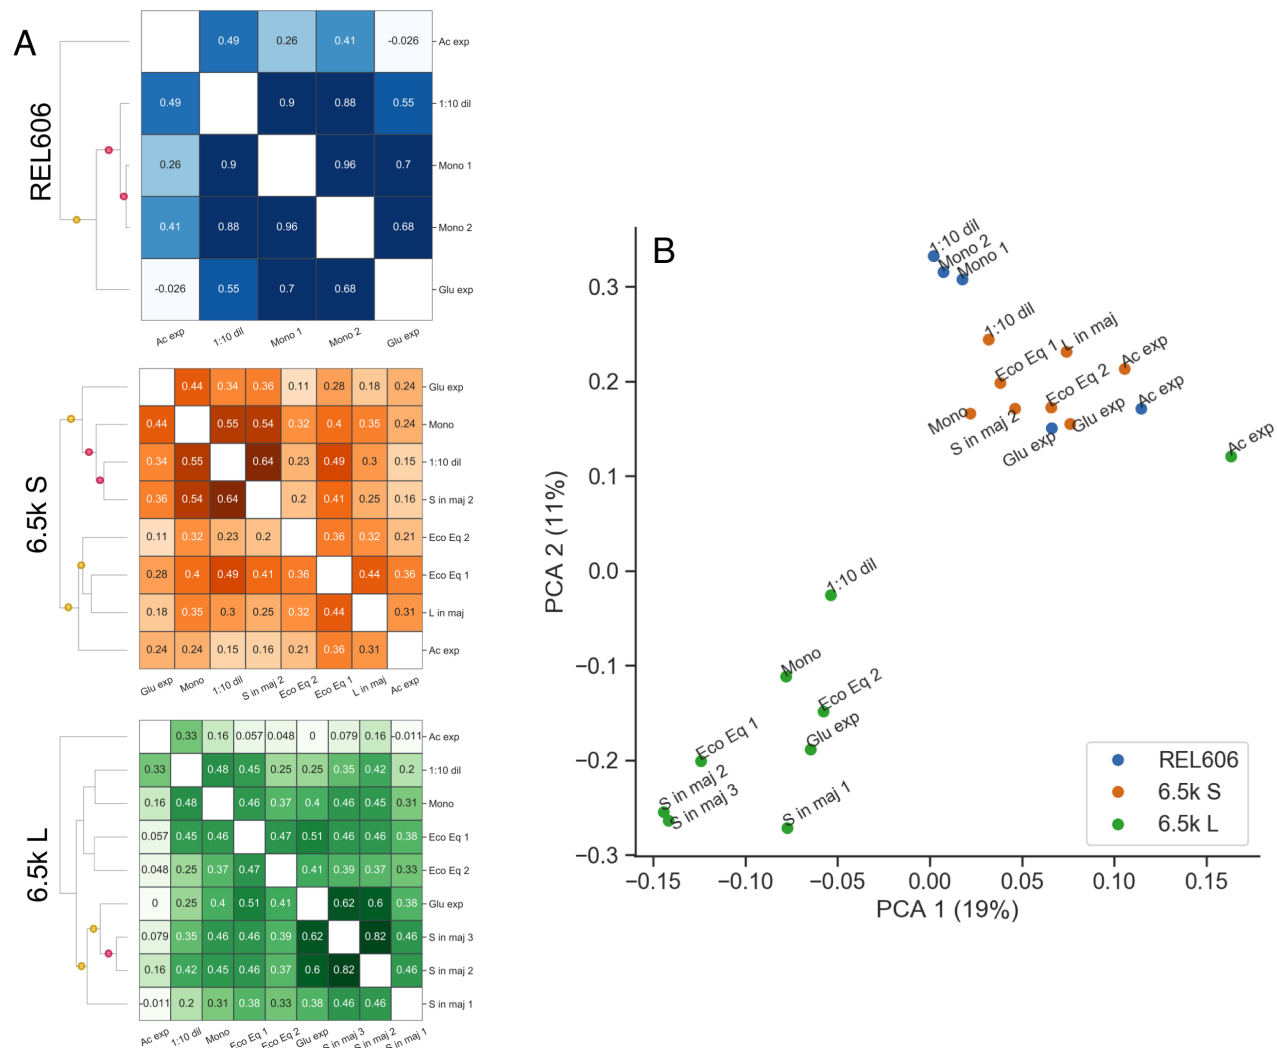

**Fig. 3. Similarity of fitness effects between environments.** (A) Clustering environments by using fitness effect correlation as a measure of similarity reveals which environments are the most functionally alike. For example, environments related to the putative ecotype niches—exponential acetate growth and glucose growth, for S and L respectively—cluster with conditions where the ecotype is in the minority. The red and yellow dots indicate that the branch has  $\geq 90\%$  or  $\geq 70\%$  support respectively, computed via bootstrapping. (B) Principal components analysis (PCA) of our data, using (normalized) fitness effects as features (% variance). We see that L experiments cluster separately from the S and REL606 experiments, with the exception of the acetate exponential phase condition.

ilar within genetic backgrounds compared to between backgrounds (Figure S19). There are a couple clusters that show non-random sampling across genetic background, however, the deviation from random sampling is mostly small, with one noticeable exception—clusters 5, 3, and 1 in REL606, S, and L, respectively, all seem to share a larger than random number of genes with each other ( $p < 10^{-4}$  for all clusters). From a Gene Ontology enrichment analysis, genes that are associated with biofilm formation (GO:0043708), adhesion (GO:0022610), and pilus organization (GO:0043711) are over-represented in these clusters, along with genes involved in organonitrogen compound biosynthesis (GO:1901566), although to a weaker extent (Figure S22). This suggests that there is at least one (large) functionally related group of genes that stay correlated across genetic backgrounds, implying that their fitness-determining effects are mostly the same, regardless of genetic background.

We wanted to know why other functional groups of genes do not stay correlated with each other, and if there was any

structure hiding in the seeming randomness of cluster reassortment. A simple first test could ask if genes in the same operon are more likely to stay correlated with each other across backgrounds, which is the case for several of our aforementioned examples. This indeed appears to be the case across all genetic backgrounds (Figure 4C). However, genes often share functions with other genes outside their operons, so we turned to investigating the relationship between the cofitness and genetic networks. We used EcoliNet as a representation of the *E. coli* genetic network, as it attempts to capture all interactions between genes by integrating various data-types, regardless of the mechanism (transcriptional, protein-protein, etc), and assigns a score to each interaction that effectively represents the strength of the interaction (58). We then computed the probability that two genes are in the same community in one genetic background, given that they're together in another background, as a function of EcoliNet score (Figures 4D). We see that gene pairs that are predicted to strongly interact (high EcoliNet score)

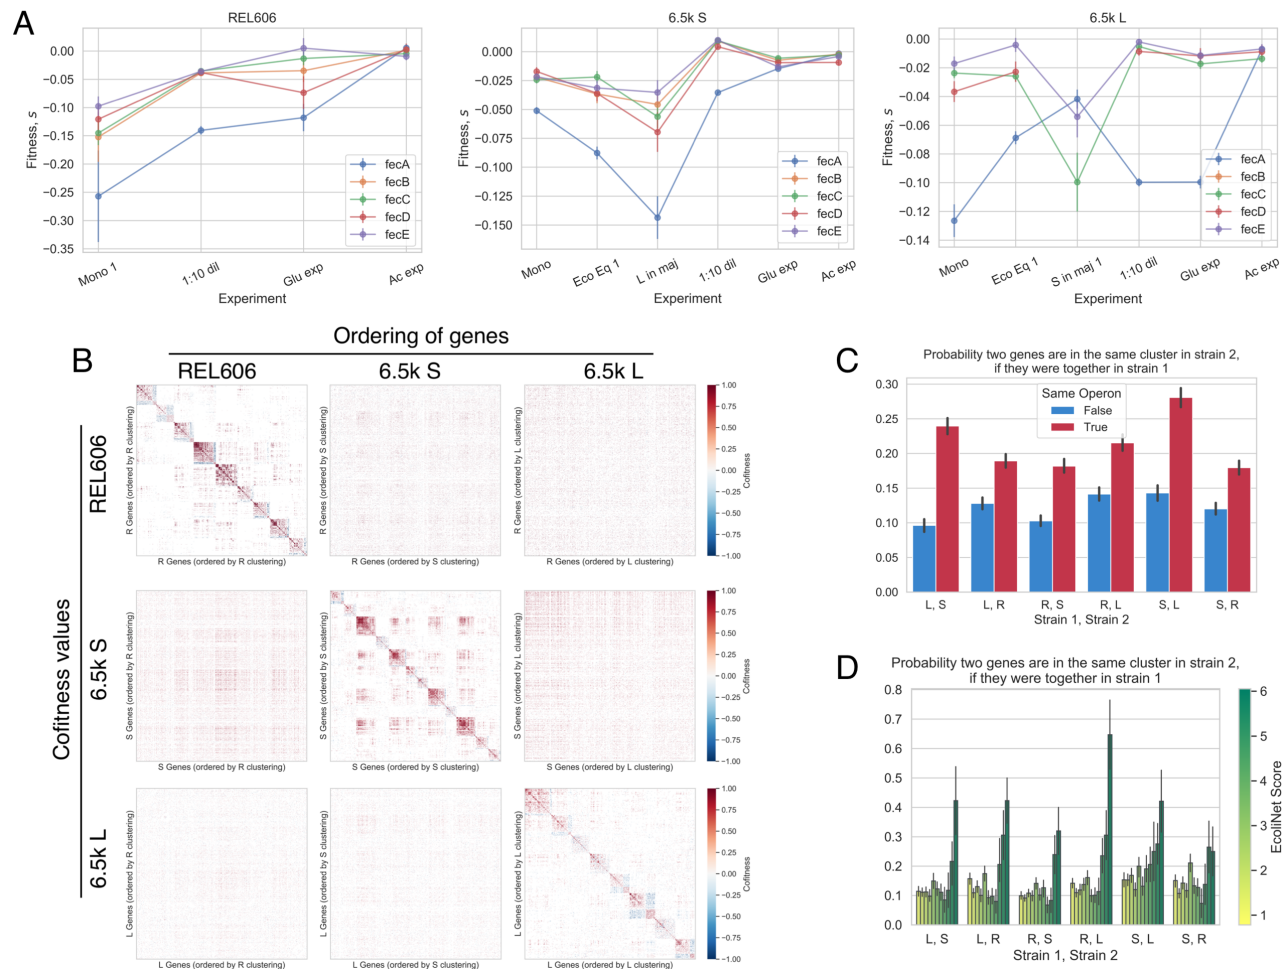

**Fig. 4. Correlations between genes across environments.** We observed that many pairs of genes have correlated fitness effects across environments, for example (A) most genes of the *fecABCDE* operon. However, *fecA* is correlated with the other genes to varying degrees, depending on the genetic background. (B) We computed the pairwise correlation of fitness effects (cofitness) for all pairs of genes, and then clustered genes with a community detection algorithm (55). We then rearranged the cofitness matrices by reordering genes based on "optimal" clustering of other genetic backgrounds. For each column, we ordered the genes based on the clustering of a given genetic background. For each row, we used the cofitness matrix for a given background. It is apparent that replotting the cofitness matrix using another strain's clustering does not produce noticeable structure. (C, D) Cluster reassortment is not entirely random—pairs of genes (C) in the same operon and (D) that strongly interact with each other (high EcoliNet score), tend to stay in the same clusters across genetic backgrounds. In contrast, the cofitness of pairs of genes that are not in those categories appear to change in a way that is indistinguishable from random reassortment. In panels C and D, the abbreviations R, S, and L refer to REL606, and 6.5k S/L, respectively.

546 are much more likely to be correlated across genetic back-  
 547 grounds. We can also see these same patterns without refer-  
 548 encing any cluster labels—if we look at the correlation be-  
 549 tween all cofitness pairs across genetic backgrounds, pairs  
 550 that are in the same operon (Figure S23A) and those with  
 551 the highest EcoliNet score (Figure S23B) give the highest cor-  
 552 relation. It also appears that the shortest distance between  
 553 two nodes in the EcoliNet network (Figure S25) also pre-  
 554 dicted if the two genes will stay correlated across genetic back-  
 555 ground, albeit the effect is weaker. We should note that it is  
 556 perhaps the case that there are weaker consistencies across  
 557 backgrounds for non-operon/non-interacting genes pairs that  
 558 we don't have the statistical power to detect. Still, these anal-  
 559 yses suggest that evolution significantly changes which func-  
 560 tional effects of genes are important for determining fitness,  
 561 such that the cofitness of genes pairs is much more preserved  
 562 across genetic background for the most strongly interacting  
 563 genes, but not as much for other gene pairs.

**Fitness effects are correlated with evolutionary out-  
 comes.** We sought to explore if the knockout fitness ef-  
 fects that we measured were correlated with evolutionary  
 outcomes in the LTEE, i.e. establishment of mutations and  
 changes in gene expression. So, we first investigated if genes  
 with non-neutral knockout fitness were more or less likely to  
 be mutated and rise to a sufficiently high frequency in the  
 population. Using the clonal sequencing data from Tenaillon  
 et al. (2016) (59) and Plucain et al. (2014) (46), we identi-  
 fied genes that mutated between selected LTEE time-points,  
 and ran a logistic model with fitness effect as the predictor  
 and mutated status as the response variable (see supplement  
 section S4.3), separately for beneficial (Figures 5A) and dele-  
 terious genes (S26A). We used three sequenced clones (one  
 available for each time point) for both S and L, while we used  
 all clones from all non-mutator populations (at a given time  
 point) for REL606. We used the appearance of a mutation  
 (excluding synonymous SNPs) within a gene as a proxy for  
 establishment.



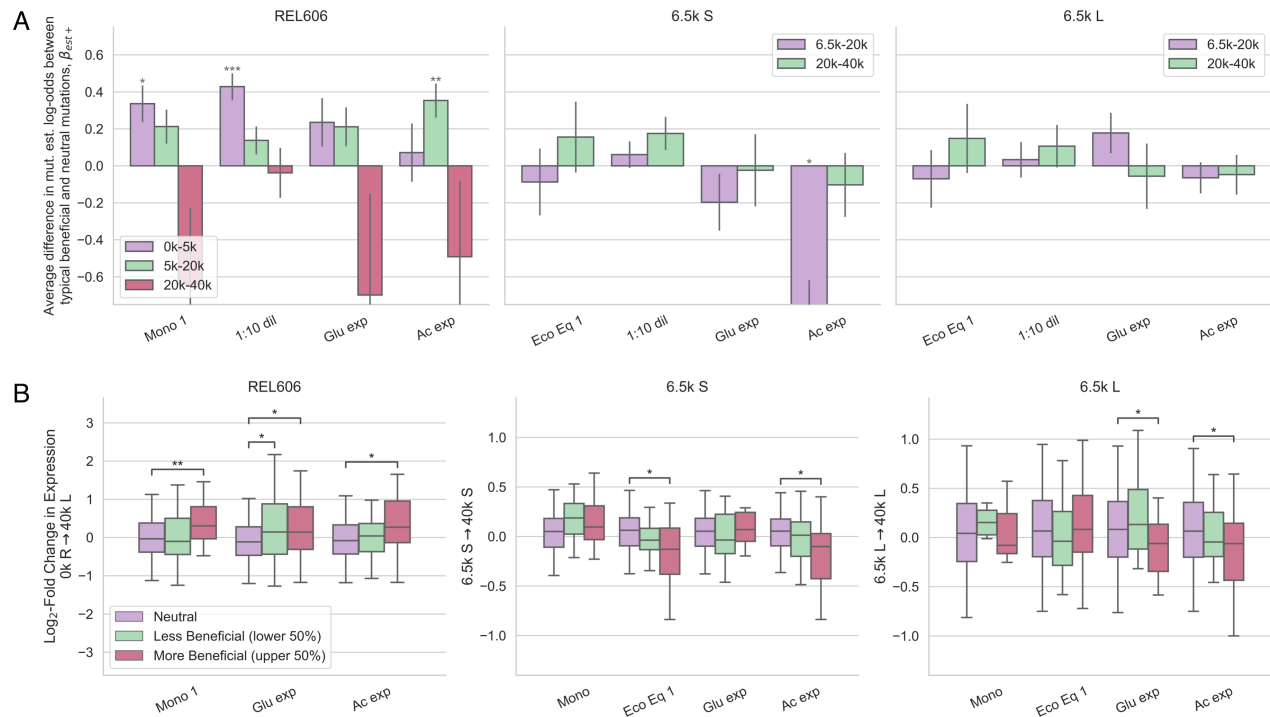

**Fig. 5. Fitness effects of beneficial genes are correlated with evolutionary outcomes.** We explored if genes with beneficial knockout fitness effects are correlated with (A) establishment of a mutation in a gene, and (B) changes in gene expression over evolutionary time, relative to neutral knockouts. (A) Slopes from logistic models, with presence of a mutation in a gene as the response variable. The fitness effects were normalized by the median beneficial fitness effect, so that coefficients can be interpreted as the average difference in log-odds establishment between neutral knockouts and the ‘typical’ beneficial knockout. REL606 beneficial knockout fitness is positively correlated with gene establishment probability for most environments, but in different time intervals, potentially pointing to shifting targets of selection. (B) We compared the distributions of log-fold change in expression between genes with neutral knockout fitness effects, less beneficial effects (lower 50%), and more beneficial effects (upper 50%). We used the change in expression from 0k genes (REL606) to 40k genes (L), from 6.5k genes (S) to 40k genes (S), and from 6.5k genes (L) to 40k genes (L) for the REL606, 6.5k S, and 6.5k L panels, respectively. The expression change between ancestor and 40k L (left) is nearly identical to the expression change between ancestor and 40k S as well as other timepoints (Figure S29). Beneficial knockout fitness in REL606 is generally positively correlated with increasing gene expression over time. In S and L, fitness in several environments—including the ecological equilibrium and acetate and glucose growth—is correlated with decreasing gene expression. Asterisks denote coefficients/comparisons that are significantly different from 0 (FDR correction; \*  $p < 0.05$ , \*\*  $p < 0.01$ , \*\*\*  $p < 0.001$ ).

583 Fitness of beneficial knockouts in the 1:10 dilution and monoculture (LTEE condition) in the REL606 back-  
 584 ground is strongly correlated with which mutations establish from 0-5k generations, while fitness in acetate exponential  
 585 phase is only correlated with establishment later in the evolution (difference in slopes between 0-5k and 5-20k is signifi-  
 586 cant at  $p < 0.05$  via permutation test for 1:10 dilution and acetate conditions, not for monoculture or glucose conditions).  
 587 This is potentially a signal that the targets of selection are shifting over time—REL606 may initially adapt via lag phase  
 588 shortening/stationary phase survival, while only later adapting via increased acetate growth rate. This could happen, for  
 589 example, by either clonal interference favoring the highest-effect mutations, or due to global epistatic effects (47). The  
 590 former hypothesis is supported by the observation that three mutations appear in genes with beneficial acetate knockouts  
 591 at 2k generations, but they then disappeared by 5k generations, potentially indicating that they were out-competed by  
 592 other beneficial mutations (Figure S28). There is only one S/L condition that shows a significant difference in muta-  
 593 tion establishment probability between beneficial and neutral mutations—genes with beneficial fitness in acetate are less  
 594 likely to mutate compared to neutrals in S. However, changes in gene expression suggest adaptation to acetate may be oc-  
 595 ccurring through indirect routes in S, as detailed below. How-

608 ever, we expect our power to detect correlations between muta-  
 609 tional fitness and mutation establishment to be lower for S  
 610 and L. They have a ~100x higher mutation rate than REL606  
 611 (48), implying that the ratio of neutral hitchhiking to benefi-  
 612 cial driver mutations is higher as well.

613 We also investigated if fitness effects are correlated with  
 614 changes in gene expression, using microarray data from Le  
 615 Gac et al. 2012 (16), which measured gene expression  
 616 in REL606, and S/L at 6.5k, 17k, and 40k generations.  
 617 These measurements serve as a distinct readout of evolution-  
 618 ary change compared to genomic mutational dynamics, be-  
 619 cause even if a gene is not directly mutated, gene expression  
 620 can still change through indirect genetic interactions. Thus,  
 621 gene expression measurements allow us to probe the effects  
 622 of the cumulative mutations fixed by evolution. We com-  
 623 pared the distribution of log-fold expression changes over  
 624 approximately 40k generations for genes with neutral and  
 625 non-neutral knockout fitness effects, separately for beneficial  
 626 (Figure 5B) and deleterious genes (Figure S26B). We see that  
 627 the median change in gene expression is significantly differ-  
 628 ent between neutral and beneficial genes across several con-  
 629 ditions, but generally only for the upper 50% of beneficial  
 630 genes. This indicates that the magnitude of the knockout fit-  
 631 ness effect is important for determining how much the median  
 632 gene changes in expression. We can get more power

633 to detect relationships between the magnitude of the knock-  
634 out fitness effect and log-fold change in gene expression by  
635 fitting linear models to the data (Figure S29). The same pat-  
636 terns hold if we restrict our analysis to highly expressed genes  
637 (Figure S30).

638 In REL606, genes with beneficial knockout fitness effects  
639 tend to increase in expression (relative to neutral genes) over  
640 evolutionary time; this is perhaps surprising, because we  
641 would expect selection to decrease gene expression if knock-  
642 ing out that gene is beneficial. We saw the same pattern with  
643 deleterious genes (Figure S26B). One possibility to explain  
644 tvery, the expression of growth-relevant genes is increased  
645 by some mutation with a highly pleiotropic effect (e.g. in a  
646 master regulator), whose overall benefits outweigh the costs  
647 of raising the expression of beneficial knockout genes.

648 In contrast, in S and L, there are a couple of environments  
649 where gene expression significantly decreases over evolu-  
650 tionary time for genes with beneficial knockout fitness ef-  
651 fects (compared to neutrals). These conditions include envi-  
652 ronments related to the putative ecotype niches—acetate and  
653 glucose exponential growth in S and L respectively. On the  
654 other hand, while fitness in the ecological equilibrium is asso-  
655 ciated with decreased gene expression, this is not the case for  
656 fitness in monoculture and the 1:10 dilution environments,  
657 indicating again that the latter environments are less rele-  
658 vant for evolution in the LTEE environment. Despite the fact  
659 that acetate-adapting mutations are not establishing on the S  
660 background (at least initially), gene expression still decreases  
661 by 40k generations, perhaps indicating that adaptation to ac-  
662 etate is occurring through routes other than directly mutating  
663 genes with beneficial knockout effects.

664 We also saw that S and L beneficial knockout fitness in glu-  
665 cose exponential phase is *positively* correlated with an in-  
666 crease in gene expression from 0-6.5k (Figure S29). On av-  
667 erage, those same genes decrease in relative gene expression  
668 when evolving on the L background, whereas they do not  
669 change on the S background. This set of data could indicate  
670 that from 0-6.5k many genes increased in gene expression  
671 via adaptive evolution that were actively unhelpful for glu-  
672 cose growth, either because of transcriptomic misallocation  
673 or other types of antagonistic pleiotropy, such that knocking  
674 them out conferred a benefit. Upon diversification of S and L,  
675 the direction of gene expression change appears to switch for  
676 L, perhaps suggesting that L is evolving towards a more glu-  
677 cose growth-optimized transcriptome, while S is not. This set  
678 of observations provides a possible example of how diversifi-  
679 cation changes the selection pressures acting on organisms.

680 Interestingly, deleterious knockout fitness effects across all  
681 environments in S/L tend to be associated with an increase  
682 in gene expression between 0 and 6.5k generations (Figure  
683 S26B). This observation may provide a partial explanation  
684 for why some knockouts become deleterious in S/L when  
685 they were neutral in REL606—6.5k generations of evolution  
686 caused the genes to suddenly become important, so they be-  
687 came more costly to knock out. Another, unrelated obser-  
688 vation could help us to understand why some genes have  
689 deleterious knockout fitness effects—it appears that deleteri-

ous genes are more highly connected in the *E. coli* gene in-  
690 teraction network (EcoliNet) compared to neutrals (on aver-  
691 age), indicating that some genes may be deleterious because  
692 when they're knockout out, they also affect the functioning  
693 of many other genes (Figure S31).  
694

## 695 Discussion

696 In order to be able to predict how evolution will proceed  
697 in community contexts, we need to know the distribution  
698 of mutational fitness effects, along with how it depends on  
699 genetic background and ecological conditions. To that end,  
700 we measured the genome-wide knockout fitness effects of a  
701 recently diversified ecosystem, S and L, and their ancestor,  
702 REL606. Despite the fact that the fitness effects of individ-  
703 ual mutations appear to be highly dependent on both genetic  
704 background and environment (strong  $(G \times) G \times E$  effects),  
705 we saw consistent statistical patterns of variation across both  
706 axes, namely global diminishing returns epistasis and a neg-  
707 ative frequency-fitness correlation (in S and L). In contrast,  
708 previous studies that observed diminishing returns epistasis  
709 saw both the mean of the DFE as well as the fitness effects  
710 of individual mutations decrease as a function of background  
711 fitness (51, 52); this discrepancy may indicate that uniform  
712 negative epistasis of individual mutations may only be rele-  
713 vant for the first handful of mutational steps, before yielding  
714 to more complex and idiosyncratic forms of epistasis. While  
715 the underlying mechanism that generates this form of global  
716 epistasis is still unclear, our observations are consistent with  
717 recent theoretical (60) and experimental work (61) that sug-  
718 gest that global diminishing returns epistasis may arise as a  
719 general consequence of idiosyncratic epistasis.

720 Even though S and L only diverged ~500 generations ago, the  
721 mixing ratio of the two ecotypes strongly affects the DFEs,  
722 suggesting that strong eco-evolutionary coupling is possible  
723 even in closely related strains. This would imply that selec-  
724 tive pressures depend strongly on the community mixture,  
725 which changes significantly and relatively rapidly due to evo-  
726 lution (42, 47). The sensitivity of knockout fitness effects to  
727 relatively minor variations on the LTEE environment, such as  
728 changing niche availability or ecosystem composition, may  
729 be evolutionarily significant—we know that the growth traits  
730 of S and L also change quite drastically during their coevolu-  
731 tion (16, 44), which along with changes to ecosystem compo-  
732 sition, will change the environment, and thus change which  
733 mutations are favored by selection. One specific hypothe-  
734 sis that emerges from our data is that selective forces may  
735 be more similar to environments related to the putative eco-  
736 type niches when the ecotype is rare, for both S and L. This  
737 is supported by both clustering environments by fitness ef-  
738 fect correlations, and which environments were correlated  
739 with changes in gene expression. It would follow that se-  
740 lection could favor different degrees of specialization within  
741 the current niche as the ecotype frequencies and growth traits  
742 change due to evolution. Regardless of the specific imple-  
743 mentation, the process where (i) mutations change growth  
744 traits and ecosystem composition, which (ii) change ecologi-  
745 cal conditions, which in turn (iii) change the mutational fit-

746 ness effects of both ecotypes, could represent an important  
747 and pervasive type of eco-evolutionary feedback.

748 We aimed to better understand the background and environ-  
749 ment dependence of mutational fitness effects by systemati-  
750 cally studying fitness correlations across environments. Our  
751 intuition was that knocking out genes with similar functions  
752 should have similar effects across environments. We saw  
753 that, by and large, different sets of genes were correlated  
754 with each other across genetic backgrounds; only strongly  
755 interacting pairs of genes were likely to be correlated across  
756 all backgrounds. These widespread changes could be caused  
757 by a number of different evolutionary phenomena—for exam-  
758 ple, evolution could have induced widespread changes in the  
759 functional effects of genes or which functional effects matter  
760 for fitness. Additionally, inasmuch as fitness in an environ-  
761 ment is a reflection of phenotype—e.g. fitness in exponential  
762 phase is likely a simple function of exponential growth rate—  
763 the extensive changes in fitness across environments could  
764 be interpreted as support for ubiquitous pleiotropic effects of  
765 knockout mutations.

766 We investigated if our measured knockout fitness effects were  
767 correlated with evolutionary outcomes, i.e. mutation estab-  
768 lishment and gene expression changes. We found significant  
769 correlations across several, but not all environments, lead-  
770 ing to hypotheses on how selection has acted on LTEE pop-  
771 ulations. From correlations of knockout fitness effects with  
772 mutation establishment, we found potential signals of shift-  
773 ing selection over time in REL606. Changes in gene expres-  
774 sion provide a distinct window into evolutionary change, as  
775 expression can change through genetic interactions, even if  
776 a gene is not directly mutated. Among other patterns, the  
777 fitness correlations with gene expression changes potentially  
778 reveal how the traits under selection changed from pre- to  
779 post-diversification, and how they are different between S and  
780 L. Pinpointing the precise causes of these patterns could be  
781 a fruitful avenue for future work. Overall, the connections  
782 between evolutionary changes and knockout fitness effects  
783 demonstrates the utility of our approach to understand how  
784 adaptation happens in the "natural" evolutionary context.

785 Ultimately, we would like to predict the outcomes of evo-  
786 lution in community contexts. By showing how the distri-  
787 bution of invasion fitness effects changes as a result of ge-  
788 netic background and ecological conditions, our dataset rep-  
789 resents a major step forward in that direction. The invasion  
790 fitness effects directly impact the establishment probability  
791 of a beneficial mutation, as well as the mutant dynamics un-  
792 til it reaches a substantial proportion of the population. The  
793 distribution of deleterious invasion fitness effects also con-  
794 trols other relevant evolutionary phenomena, including the  
795 equilibrium reached by mutation-selection balance, and the  
796 probability that a deleterious mutation will hitchhike on a  
797 beneficial mutant ("genetic draft"). However, in principal,  
798 the fitness effect of a mutation could change as it approaches  
799 fixation (within the ecotype) due to frequency-dependent ef-  
800 fects. We are not able to measure these effects with our ex-  
801 perimental set-up, as our ability to measure fitness effects in  
802 high-throughput requires that mutants remain rare. However,

803 frequency-dependent mutations could significantly alter ex-  
804 pected evolutionary dynamics, so as such, measuring such  
805 effects are a major direction for future work.

806 As previously mentioned, we only surveyed the fitness effects  
807 of knockout mutations, which represent a subset of all muta-  
808 tions available to an organism. While it is possible that other  
809 types of mutations could display different patterns, knockout  
810 mutations appear to be prevalent and important for adapta-  
811 tion in the LTEE (47, 62), and our measured knockout fit-  
812 ness effects are correlated with evolutionary outcomes. Addi-  
813 tionally, we studied a relatively simple ecosystem, consisting  
814 of just two recently diverged ecotypes; measuring the muta-  
815 tional effects in more complicated ecosystems and how they  
816 change as a result of longer periods of evolution is likely a  
817 fruitful future avenue of investigation. Overall, the methods  
818 and results presented here pave the way for future studies  
819 investigating how mutational fitness effects depend on eco-  
820 evolutionary processes, and how eco-evolutionary feedback  
821 arises from changing fitness effects.

## 822 Methods

823 See supplementary information.

## 824 Data, code, and strain availability

825 Glycerol stock copies of the REL606, 6.5k S, and 6.5k L Tn5  
826 barcoded libraries are available upon request. All code used  
827 to process the data and perform the analyses as well as pro-  
828 cessed data are available on GitHub,  
829 <https://github.com/joaoascensao/S-L-REL606-BarSeq>

## 830 ACKNOWLEDGEMENTS

831 We thank Matti Gralka and QinQin Yu for early-phase experimental assistance.  
832 We thank current and former members of the Hallatschek and Arkin labs for pro-  
833 ductive discussions and feedback regarding this project, especially Morgan Price,  
834 Jonas Denk, and QinQin Yu. We thank Richard Lenski for sending us the REL606,  
835 6.5k S and L clones, along with experimental advice and feedback. Research re-  
836 ported in this publication was supported by a National Science Foundation CA-  
837 REER Award (1555330) and by the Miller Institute for Basic Research in Science,  
838 University of California, Berkeley. Some elements of this project were funded by  
839 ENIGMA-Ecosystems and Networks Integrated with Genes and Molecular Assem-  
840 blies (<http://enigma.lbl.gov>), a Science Focus Area Program at Lawrence Berkeley  
841 National Laboratory, and is based upon work supported by the U.S. Department  
842 of Energy, Office of Science, Office of Biological & Environmental Research un-  
843 der contract number DE-AC02-05CH11231. JAA acknowledges support from an  
844 NSF graduate research fellowship, a Berkeley fellowship (from UC Berkeley), and  
845 Lloyd and Brodie scholarships (from UC Berkeley Dept of Bioengineering). BHG ac-  
846 knowledges support from an award from the Alfred P. Sloan Foundation (FG-2021-  
847 15708). This research used resources of the National Energy Research Scientific  
848 Computing Center (NERSC), a U.S. Department of Energy Office of Science User  
849 Facility located at Lawrence Berkeley National Laboratory, operated under Contract  
850 No. DE-AC02-05CH11231 using NERSC award ERCAP0021398. This work used  
851 the Vincent J. Coates Genomics Sequencing Laboratory at UC Berkeley, supported  
852 by NIH S10 OD018174 Instrumentation Grant. The bacteria (IGI prokaryote icon;  
853 <https://innovativegenomics.org/glossary/>) and erlenmeyer flask (flask-2 icon by DB-  
854 CLS; <https://bioicons.com/>) clipart from Figure 1B are used and modified under cre-  
855 ative commons licenses, CC BY-NC-SA 4.0 and CC-BY 4.0 respectively. BioRxiv  
856 preprint was prepared in Overleaf with the (modified) Henriques Lab LaTeX tem-  
857 plate.

## 858 References

- 859 1. Freya Harrison. Microbial ecology of the cystic fibrosis lung. *Microbiology (Reading, Eng-  
860 land)*, 153(Pt 4):917–923, 4 2007. ISSN 1350-0872. doi: 10.1099/MIC.0.2006/004077-0.
- 861 2. Susannah Selber-Hnativ, Belise Rukundo, Masoumeh Ahmadi, Hayfa Akoubi, Hend Al-  
862 Bizri, Adelekan F. Aliu, Tanyi U. Ambeaghen, Lilil Avetisyan, Irmak Bahar, Alexandra Baird,  
863 Fatema Begum, Hélène Ben Soussan, Virginie Blondeau-éthier, Roxane Bordaries, He-  
864 lene Bramwell, Alicia Briggs, Richard Bui, Matthew Carnevale, Marisa Chanchareon, Talia  
865 Chevassus, Jin H. Choi, Karyne Coulombe, Florence Couvrette, Samantha D'Abreu,



- 866 Meghan Davies, Marie Pier Desbiens, Tamara Di Maulo, Sean Anthony Di Paolo, Sabri-  
867 rina Do Ponte, Priscyla dos Santos Ribeiro, Laure Anne Dubuc-Kanary, Paola K. Dun-  
868 can, Frédéric Dupuis, Sara El-Nounou, Christina N. Eyangos, Natasha K. Ferguson,  
869 Nancy R. Flores-Chinchilla, Tanya Fotakis, H. D. Mariam Gado Oumarou, Metodi Georgiev,  
870 Seyedehnazanin Ghiassy, Natalija Gitelbic, Julien Grégoire Bouchard, Tazkia Hassan, Iman  
871 Huseen, Marlon Francis Ibuna Quilitan, Tania Lozzo, Safina Islam, Dilan B. Jauncky, Aniththa  
872 Jayasegaram, Marc André Johnston, Matthew R. Kahler, Kiranpreet Kaler, Cedric Kamani,  
873 Hessaam Karimian Rad, Elisavet Konidis, Filip Konieczny, Sandra Kurianowicz, Philippe  
874 Lamothe, Karina Legros, Sebastien Leroux, Jun Li, Monica E. Lozano Rodriguez, Sean  
875 Luponio-Yoffe, Yara Maalouf, Jessica Mantha, Melissa McCormick, Pamela Mondragon,  
876 Thivaadee Narayana, Elizaveta Neretin, Thi T.T. Nguyen, Ian Niu, Romeo B. Nkemazem,  
877 Martin O'Donovan, Matthew Oueis, Stevens Paquette, Nehal Patel, Emily Pecki, Jackie  
878 Peters, Annie Pettorelli, Cassandra Poirier, Victoria R. Pempa, Harshvardhan Rajen, Regi-  
879 nald Olivier Ralph, Josué Rosales-Vasquez, Daria Rubinshteyn, Surya Sakr, Mohammad S.  
880 Sebai, Lisa Serravalle, Fily Sidibe, Ahnjana Sinnathurai, Dominique Soho, Adithi Sundarak-  
881 ishnan, Veronika Svistkova, Tsolaye E. Ugbeye, Megan S. Vasconcelos, Michael Vincelli,  
882 Olga Voitovich, Pamela Vrbel, Lu Wang, Maryse Wasfi, Cong Y. Zha, and Chiara Gamberi.  
883 Human gut microbiota: Toward an ecology of disease. *Frontiers in Microbiology*, 8(JUL):  
884 1265, 7 2017. ISSN 1664302X. doi: 10.3389/FMICB.2017.01265/BIBTEX.
- 885 3. Paul G. Falkowski, Tom Fenchel, and Edward F. Delong. The microbial engines that drive  
886 Earth's biogeochemical cycles. *Science (New York, N.Y.)*, 320(5879):1034–1039, 5 2008.  
887 ISSN 1095-9203. doi: 10.1126/SCIENCE.1153213.
- 888 4. Steven J. Biller, Paul M. Berube, Debbie Lindell, and Sallie W. Chisholm. Prochlorococcus:  
889 the structure and function of collective diversity. *Nature Reviews Microbiology* 2014 13:1,  
890 13(1):13–27, 12 2014. ISSN 1740-1534. doi: 10.1038/nrmicro3378.
- 891 5. Cameron Wagg, Yann Hautier, Sarah Pellkofer, Samiran Banerjee, Bernhard Schmid, and  
892 Marcel G.A. van der Heijden. Diversity and asynchrony in soil microbial communities stabi-  
893 lizes ecosystem functioning. *eLife*, 10, 3 2021. ISSN 2050084X. doi: 10.7554/ELIFE.62813.
- 894 6. Emily B. Graham, Joseph E. Knelman, Andreas Schindlbacher, Steven Siciliano, Marc  
895 Breulmann, Anthony Yannarell, J. M. Beman, Guy Abell, Laurent Philippot, James Prosser,  
896 Arnaud Fouquier, Jorge C. Yuste, Helen C. Glanville, Davey L. Jones, Roey Angel, Janne  
897 Salminen, Ryan J. Newton, Helmut Bürgmann, Lachlan J. Ingram, Ute Hamer, Henri M.P.  
898 Siljanen, Krista Peltoniemi, Karin Pothast, Luis Bañeras, Martin Hartmann, Samiran Baner-  
899 jee, Ri Qing Yu, Geraldine Nogaro, Andreas Richter, Marianne Koranda, Sarah C. Castle,  
900 Marta Goberna, Bongkeun Song, Amitava Chatterjee, Olga C. Nunes, Ana R. Lopes, Yiping  
901 Gao, Aurore Kaisermann, Sara Hallin, Michael S. Strickland, Jordi Garcia-Pausas, Josep  
902 Barba, Hojeong Kang, Kazuo Isobe, Sokratis Pappaspyrou, Roberta Pastorelli, Alessandra  
903 Lagomarsino, Eva S. Lindström, Nathan Basliko, and Diana R. Nemergut. Microbes as  
904 engines of ecosystem function: When does community structure enhance predictions of  
905 ecosystem processes? *Frontiers in Microbiology*, 7(FEB):214, 2 2016. ISSN 1664302X.  
906 doi: 10.3389/FMICB.2016.00214/BIBTEX.
- 907 7. Shijie Zhao, Tami D. Lieberman, Mathilde Poyet, Kathryn M. Kauffman, Sean M. Gibbons,  
908 Mathieu Groussin, Ramnik J. Xavier, and Eric J. Alm. Adaptive Evolution within Gut Micro-  
909 biomes of Healthy People. *Cell Host and Microbe*, 25(5):656–667, 2019. ISSN 19346069.  
910 doi: 10.1016/j.chom.2019.03.007.
- 911 8. Anders Folkesson, Lars Jelsbak, Lei Yang, Helle Krogh Johansen, Oana Ciofu, Niels Hoiby,  
912 and Soren Molin. Adaptation of *Pseudomonas aeruginosa* to the cystic fibrosis airway: An  
913 evolutionary perspective, 12 2012. ISSN 17401526.
- 914 9. Ana Sousa, Ricardo S. Ramiro, João Barroso-Batista, Daniela Güleresi, Marta Lourenço,  
915 and Isabel Gordo. Recurrent Reverse Evolution Maintains Polymorphism after Strong Bot-  
916 tlenecks in Commensal Gut Bacteria. *Molecular Biology and Evolution*, 34(11):2879–2892,  
917 11 2017. ISSN 0737-4038. doi: 10.1093/MOLBEV/MSX221.
- 918 10. Nandita R Garud, Benjamin H Good, Oskar Hallatschek, and Katherine S Pollard. Evolu-  
919 tionary dynamics of bacteria in the gut microbiome within and across hosts. *bioRxiv*, pages  
920 1–38, 2017.
- 921 11. Evgeni M. Frenkel, Michael J. McDonald, J. David Van Dyken, Katya Kosheleva, Grego-  
922 ry I. Lang, and Michael M. Desai. Crowded growth leads to the spontaneous evolution of  
923 semistable coexistence in laboratory yeast populations. *Proceedings of the National*  
924 *Academy of Sciences of the United States of America*, 112(36):11306–11311, 2015. ISSN  
925 10916490. doi: 10.1073/pnas.1506184112.
- 926 12. Z. D. Blount, C. Z. Borland, and R. E. Lenski. Historical contingency and the evolution  
927 of a key innovation in an experimental population of *Escherichia coli*. *Proceedings of the*  
928 *National Academy of Sciences*, 105(23):7899–7906, 6 2008. ISSN 0027-8424. doi: 10.  
929 1073/pnas.0803151105.
- 930 13. Helling RB, Vargas CN, and Adams J. Evolution of *Escherichia coli* during growth in a  
931 constant environment. *Genetics*, 116(3):349–358, 7 1987. ISSN 0016-6731. doi: 10.1093/  
932 GENETICS/116.3.349.
- 933 14. Kinnersley M, Wenger J, Kroll E, Adams J, Sherlock G, and Rosenzweig F. Ex uno plures:  
934 clonal reinforcement drives evolution of a simple microbial community. *PLoS genetics*, 10  
935 (6), 2014. ISSN 1553-7404. doi: 10.1371/JOURNAL.PGEN.1004430.
- 936 15. Matthew D. Herron and Michael Doebeli. Parallel Evolutionary Dynamics of Adaptive Diver-  
937 sification in *Escherichia coli*. *PLoS Biology*, 11(2):e1001490, 2 2013. ISSN 1545-7885. doi:  
938 10.1371/journal.pbio.1001490.
- 939 16. Mickaël Le Gac, Jessica Plucain, Thomas Hindré, Richard E. Lenski, and Dominique  
940 Schneider. Ecological and evolutionary dynamics of coexisting lineages during a long-  
941 term experiment with *Escherichia coli*. *Proceedings of the National Academy of Sci-  
942 ences of the United States of America*, 96(18):10242–7, 8 2012. ISSN 0027-8424. doi:  
943 10.1073/pnas.96.18.10242.
- 944 17. David M Post and Eric P Palkovacs. Eco-evolutionary feedbacks in community and ecosys-  
945 tem ecology: interactions between the ecological theatre and the evolutionary play. *Philoso-  
946 phical transactions of the Royal Society of London. Series B, Biological sciences*, 364  
947 (1523):1629–40, 6 2009. ISSN 1471-2970. doi: 10.1098/rstb.2009.0012.
- 948 18. K. N. Laland, F. J. Odling-Smee, and M. W. Feldman. Evolutionary consequences of niche  
949 construction and their implications for ecology. *Proceedings of the National Academy of*  
950 *Sciences*, 96(18):10242–10247, 1999. ISSN 0027-8424. doi: 10.1073/pnas.96.18.10242.
- 951 19. Benjamin H Good, Stephen Martis, and Oskar Hallatschek. Adaptation limits ecological  
diversification and promotes ecological tinkering during the competition for substitutable re-  
952 sources. *Proceedings of the National Academy of Sciences of the United States of America*,  
953 115(44):E10407–E10416, 10 2018. ISSN 1091-6490. doi: 10.1073/pnas.1807530115.
- 954 20. Kyle I Harrington and Alvaro Sanchez. Eco-evolutionary dynamics of complex social strate-  
955 gies in microbial communities. *Communicative & Integrative Biology*, 7(1):e28230, 1 2014.  
956 ISSN 1942-0889. doi: 10.4161/cib.28230.
- 957 21. Sandeep Venkataram, Huan-Yu Kuo, Erik F. Y. Hom, and Sergey Kryazhmskiy. Mutualism-  
958 enhancing mutations dominate early adaptation in a microbial community. *bioRxiv*, page  
959 2021.07.07.451547, 7 2022. doi: 10.1101/2021.07.07.451547.
- 960 22. Massimo Amicone and Isabel Gordo. Molecular signatures of resource competition: Clonal  
961 interference favors ecological diversification and can lead to incipient speciation. *Evolution*,  
962 2021. ISSN 1558-5646. doi: 10.1111/EVO.14315.
- 963 23. John H. Gillespie. Molecular Evolution Over the Mutational Landscape. *Evolution*, 38(5):  
964 1116, 9 1984. doi: 10.2307/2408444.
- 965 24. H. Allen Orr. The Population Genetics of Adaptation: The Distribution of Factors Fixed  
966 during Adaptive Evolution. *Evolution*, 52(4):935, 8 1998. doi: 10.2307/2411226.
- 967 25. H Allen Orr. The distribution of fitness effects among beneficial mutations. *Genetics*, 163  
968 (4):1519, 4 2003.
- 969 26. Benjamin H. Good, Igor M. Rouzine, Daniel J. Balick, Oskar Hallatschek, and Michael M.  
970 Desai. Distribution of fixed beneficial mutations and the rate of adaptation in asexual popu-  
971 lations. *Proceedings of the National Academy of Sciences of the United States of America*,  
972 109(13):4950–4955, 2012. ISSN 00278424. doi: 10.1073/pnas.1119910109.
- 973 27. Daniel P Rice, Benjamin H Good, Michael M Desai, and R. Korona. The evolutionarily  
974 stable distribution of fitness effects. *Genetics*, 200(1):321–9, 5 2015. ISSN 1943-2631. doi:  
975 10.1534/genetics.114.173815.
- 976 28. Michael M Desai and Daniel S Fisher. Beneficial mutation selection balance and the effect  
977 of linkage on positive selection. *Genetics*, 176(3):1759–98, 7 2007. ISSN 0016-6731. doi:  
978 10.1534/genetics.106.067678.
- 979 29. Michael M. Desai, Daniel S. Fisher, and Andrew W. Murray. The Speed of Evolution and  
980 Maintenance of Variation in Asexual Populations. *Current Biology*, 17(5):385–394, 2007.  
981 ISSN 09609822. doi: 10.1016/j.cub.2007.01.072.
- 982 30. Alex N. Nguyen Ba, Ivana Cvijović, José I. Rojas Echenique, Katherine R. Lawrence, Artur  
983 Rego-Costa, Xianan Liu, Sasha F. Levy, and Michael M. Desai. High-resolution lineage  
984 tracking reveals travelling wave of adaptation in laboratory yeast. *Nature* 2019, pages 1–11,  
985 2019. ISSN 0028-0836. doi: 10.1038/s41586-019-1749-3.
- 986 31. Sasha F. Levy, Jamie R. Blundell, Sandeep Venkataram, Dmitri A. Petrov, Daniel S. Fisher,  
987 and Gavin Sherlock. Quantitative evolutionary dynamics using high-resolution lineage track-  
988 ing. *Nature*, 519(7542):181–186, 3 2015. ISSN 0028-0836. doi: 10.1038/nature14279.
- 989 32. Kimberly S. Vasquez, Lisa Willis, Nate J. Cirra, Katharine M. Ng, Miguel F. Pedro, Andrés  
990 Aranda-Díaz, Manohar Rajendram, Feiqiao Brian Yu, Steven K. Higginbottom, Norma Neff,  
991 Gavin Sherlock, Karina B. Xavier, Stephen R. Quake, Justin L. Sonnenburg, Benjamin H.  
992 Good, and Kerwyn Casey Huang. Quantifying rapid bacterial evolution and transmission  
993 within the mouse intestine. *Cell Host & Microbe*, 29(9):1454–1468, 9 2021. ISSN 1931-  
994 3128. doi: 10.1016/j.chom.2021.08.003.
- 995 33. Jamie R. Blundell, Katja Schwartz, Danielle Francois, Daniel S. Fisher, Gavin Sherlock,  
996 and Sasha F. Levy. The dynamics of adaptive genetic diversity during the early stages of  
997 clonal evolution. *Nature Ecology & Evolution*, 3(2):293–301, 2 2019. ISSN 2397-334X. doi:  
998 10.1038/s41559-018-0758-1.
- 999 34. Sandeep Venkataram, Barbara Dunn, Yuping Li, Atish Agarwal, Jessica Chang, Emily R  
1000 Ebel, Kerry Geiler-Samerotte, Lucas Hérisant, Jamie R Blundell, Sasha F Levy, Daniel S  
1001 Fisher, Gavin Sherlock, and Dmitri A Petrov. Development of a Comprehensive Genotype-  
1002 Fitness Map of Adaptation-Driving Mutations in Yeast. *Cell*, 166(6):1585–1596, 9 2016.  
1003 ISSN 1097-4172. doi: 10.1016/j.cell.2016.08.002.
- 1004 35. Milo S. Johnson, Alena Martsul, Sergey Kryazhmskiy, and Michael M. Desai. Higher-fitness  
1005 yeast genotypes are less robust to deleterious mutations. *Science*, 366(6464):490–493, 10  
1006 2019. ISSN 10959203. doi: 10.1126/science.aay4199.
- 1007 36. Celia Payen, Anna B. Sunshine, Giang T. Ong, Jamie L. Pogachar, Wei Zhao, and  
1008 Maitreya J. Dunham. High-Throughput Identification of Adaptive Mutations in Experimentally  
1009 Evolved Yeast Populations. *PLoS Genetics*, 12(10):e1006339, 10 2016. ISSN 1553-7404.  
1010 doi: 10.1371/JOURNAL.PGEN.1006339.
- 1011 37. Grant Kinsler, Kerry Geiler-Samerotte, and Dmitri Petrov. Fitness variation across subtle  
1012 environmental perturbations reveals local modularity and global pleiotropy of adaptation.  
1013 *eLife*, 9:1–52, 12 2020. doi: 10.7554/ELIFE.61271.
- 1014 38. Yuping Li, Sandeep Venkataram, Atish Agarwal, Barbara Dunn, Dmitri A. Petrov, Gavin  
1015 Sherlock, and Daniel S. Fisher. Hidden Complexity of Yeast Adaptation under Simple  
1016 Evolutionary Conditions. *Current Biology*, 28(4):515–525, 2 2018. ISSN 09609822. doi:  
1017 10.1016/j.cub.2018.01.009.
- 1018 39. Yuping Li, Dmitri A. Petrov, and Gavin Sherlock. Single nucleotide mapping of trait space  
1019 reveals Pareto fronts that constrain adaptation. *Nature Ecology and Evolution*, 3(11):1539–  
1020 1551, 2019. ISSN 2397334X. doi: 10.1038/s41559-019-0993-0.
- 1021 40. Kelly M Wetmore, Morgan N Price, Robert J Waters, Jacob S Lamson, Jennifer He,  
1022 Cindi A Hoover, Matthew J Blow, James Bristow, Gareth Butland, Adam P Arkin, and Adam  
1023 Deutschbauer. Rapid quantification of mutant fitness in diverse bacteria by sequencing  
1024 randomly bar-coded transposons. *mBio*, 6(3):00306–15, 5 2015. ISSN 2150-7511. doi:  
1025 10.1128/mBio.00306-15.
- 1026 41. Morgan N. Price, Kelly M. Wetmore, R. Jordan Waters, Mark Callaghan, Jayashree Ray,  
1027 Hualan Liu, Jennifer V. Kuehl, Ryan A. Melnyk, Jacob S. Lamson, Yumi Suh, Hans K.  
1028 Carlson, Zuelma Esquivel, Harini Sadeeshkumar, Romy Chakraborty, Grant M. Zane, Ben-  
1029 jamin E. Rubin, Judy D. Wall, Axel Visel, James Bristow, Matthew J. Blow, Adam P. Arkin,  
1030 and Adam M. Deutschbauer. Mutant phenotypes for thousands of bacterial genes of un-  
1031 known function. *Nature*, page 1, 5 2018. ISSN 0028-0836. doi: 10.1038/s41586-018-0124-0.
- 1032 42. Daniel E Rozen and Richard E Lenski. Long-Term Experimental Evolution in *Escherichia*  
1033 *coli*. VIII. Dynamics of a Balanced Polymorphism. *The American naturalist*, 155(1):24–35,  
1034 1 2000. ISSN 1537-5323. doi: 10.1086/303299.
- 1035 43. Daniel E. Rozen, Nadège Philippe, J. Arjan de Visser, Richard E. Lenski, and Dominique  
1036 Schneider. Death and cannibalism in a seasonal environment facilitate bacterial coexis-  
1037

- 1038 tence. *Ecology Letters*, 12(1):34–44, 1 2009. ISSN 1461023X. doi: 10.1111/j.1461-0248.  
1039 2008.01257.x.
- 1040 44. Tobias Großkopf, Jessica Consuegra, Joël Gaffé, John C. Willison, Richard E. Lenski,  
1041 Orkun S. Soyer, and Dominique Schneider. Metabolic modelling in a dynamic evolu-  
1042 tionary framework predicts adaptive diversification of bacteria in a long-term evolu-  
1043 tion experiment. *BMC Evolutionary Biology*, 16(1):163, 12 2016. ISSN 1471-2148. doi:  
1044 10.1186/s12862-016-0733-x.
- 1045 45. Daniel E. Rozen, Dominique Schneider, and Richard E. Lenski. Long-Term Experimen-  
1046 tal Evolution in *Escherichia coli*. XIII. Phylogenetic History of a Balanced Polymor-  
1047 phism. *Journal of Molecular Evolution*, 61(2):171–180, 8 2005. ISSN 0022-2844. doi:  
1048 10.1007/s00239-004-0322-2.
- 1049 46. Jessica Plucain, Thomas Hindré, Mickaël Le Gac, Olivier Tenaillon, Stéphane Cruveiller,  
1050 Claudine Médigue, Nicholas Leiby, William R. Harcombe, Christopher J. Marx, Richard E.  
1051 Lenski, and Dominique Schneider. Epistasis and allele specificity in the emergence of  
1052 a stable polymorphism in *Escherichia coli*. *Science*, 343(6177):1366–1369, 2014. ISSN  
1053 10959203. doi: 10.1126/science.1248688.
- 1054 47. Benjamin H. Good, Michael J. McDonald, Jeffrey E. Barrick, Richard E. Lenski, and  
1055 Michael M. Desai. The dynamics of molecular evolution over 60,000 generations. *Nature*,  
1056 551(7678):45–50, 10 2017. ISSN 0028-0836. doi: 10.1038/nature24287.
- 1057 48. Paul D. Sniegowski, Philip J. Gerrish, and Richard E. Lenski. Evolution of high mutation  
1058 rates in experimental populations of *E. coli*. *Nature*, 387(6634):703–705, 1997. ISSN  
1059 00280836. doi: 10.1038/42701.
- 1060 49. Benjamin H. Good and Michael M. Desai. The Impact of Macroscopic Epistasis on Long-  
1061 Term Evolutionary Dynamics. *Genetics*, 199(1):177–190, 1 2015. ISSN 0016-6731. doi:  
1062 10.1534/genetics.114.172460.
- 1063 50. Michael J. Wiser, Noah Ribeck, and Richard E. Lenski. Long-term dynamics of adaptation  
1064 in asexual populations. *Science*, 342(6164):1364–1367, 2013. ISSN 10959203. doi: 10.  
1065 1126/science.1243357.
- 1066 51. A. I. Khan, D. M. Dinh, D. Schneider, R. E. Lenski, and T. F. Cooper. Negative Epistasis  
1067 Between Beneficial Mutations in an Evolving Bacterial Population. *Science*, 332(6034):  
1068 1193–1196, 6 2011. ISSN 0036-8075. doi: 10.1126/science.1203801.
- 1069 52. Sergey Kryazhimskiy, Daniel P. Rice, Elizabeth R. Jerison, and Michael M. Desai. Global  
1070 epistasis makes adaptation predictable despite sequence-level stochasticity. *Science (New*  
1071 *York, N.Y.)*, 344(6191):1519–1522, 6 2014. ISSN 1095-9203. doi: 10.1126/science.1250939.
- 1072 53. Peng F. Widmann S. Wünsche A. Duan K. Donovan KA, Dobson RCJ, Lenski RE, and  
1073 Cooper TF. Effects of Beneficial Mutations in *pykF* Gene Vary over Time and across Replicate  
1074 Populations in a Long-Term Experiment with Bacteria. *Molecular biology and evolution*,  
1075 35(1):202–210, 1 2018. ISSN 1537-1719. doi: 10.1093/MOLBEV/MSX279.
- 1076 54. Farida Vasi, Michael Travisano, and Richard E. Lenski. Long-Term Experimental Evolution  
1077 in *Escherichia coli*. II. Changes in Life-History Traits During Adaptation to a Seasonal Envi-  
1078 ronment. <https://doi.org/10.1086/285685>, 144(3):432–456, 10 1994. doi: 10.1086/285685.
- 1079 55. Ferran Parés, Dario Garcia-Gasulla, Armand Vilalta, Jonatan Moreno, Eduard Ayguadé,  
1080 Jesús Labarta, Ulises Cortés, and Toyotaro Suzumura. Fluid Communities: A Competitive,  
1081 Scalable and Diverse Community Detection Algorithm. *Studies in Computational Intelli-*  
1082 *gence*, 689:229–240, 3 2017.
- 1083 56. Yasuhiro Takahashi and Umechiyo Tokumoto. A Third Bacterial System for the Assembly of  
1084 Iron-Sulfur Clusters with Homologs in Archaea and Plastids. *Journal of Biological Chem-*  
1085 *istry*, 277(32):28380–28383, 8 2002. ISSN 0021-9258. doi: 10.1074/JBC.C200365200.
- 1086 57. Ulrik Brandes, Daniel Delling, Marco Gaertler, Robert Görke, Martin Hoefer, Zoran  
1087 Nikołoski, and Dorothea Wagner. On Modularity Clustering. *IEEE Transactions on Knowl-*  
1088 *edge and Data Engineering*, 20(2):172–188, 2 2008. ISSN 10414347. doi: 10.1109/TKDE.  
1089 2007.190689.
- 1090 58. Kim H. Shim JE, Shin J, and Lee I. EcolNet: a database of cofunctional gene network for  
1091 *Escherichia coli*. *Database : the journal of biological databases and curation*, 2015, 2015.  
1092 ISSN 1758-0463. doi: 10.1093/DATABASE/BAV001.
- 1093 59. Olivier Tenaillon, Jeffrey E. Barrick, Noah Ribeck, Daniel E. Deatherage, Jeffrey L. Blan-  
1094 chard, Aurko Dasgupta, Gabriel C. Wu, Sébastien Wielgoss, Stéphane Cruveiller, Clau-  
1095 dine Médigue, Dominique Schneider, and Richard E. Lenski. Tempo and mode of genome  
1096 evolution in a 50,000-generation experiment. *Nature*, 536(7615):165–170, 8 2016. ISSN  
1097 14764687. doi: 10.1038/nature18959.
- 1098 60. Gautam Reddy and Michael M. Desai. Global epistasis emerges from a generic model of a  
1099 complex trait. *bioRxiv*, page 2020.06.14.150946, 6 2020. doi: 10.1101/2020.06.14.150946.
- 1100 61. Christopher W. Bakerlee, Alex N. Nguyen Ba, Yekaterina Shulgina, Jose I. Rojas Echenique,  
1101 and Michael M. Desai. Idiosyncratic epistasis leads to global fitness–correlated trends.  
1102 *Science*, 376(6593):630–635, 5 2022. ISSN 0036-8075. doi: 10.1126/SCIENCE.ABM4774.
- 1103 62. Rohan Maddamsetti, Philip J. Hatcher, Anna G. Green, Barry L. Williams, Debora S. Marks,  
1104 and Richard E. Lenski. Core Genes Evolve Rapidly in the Long-Term Evolution Experiment  
1105 with *Escherichia coli*. *Genome Biology and Evolution*, 9(4):1072, 4 2017. doi: 10.1093/GBE/  
1106 EVX064.
- 1107 63. Antti Haapala, Esa Määttä, Mikko Ohtamaa, and David Necas. *python-Levenshtein*.
- 1108 64. Murray Aitkin, Richard J. Boys, and Tom Chadwick. Bayesian point null hypothesis testing  
1109 via the posterior likelihood ratio. *Statistics and Computing*, 15(3):217–230, 2005. ISSN  
1110 09603174. doi: 10.1007/s11222-005-1310-0.
- 1111 65. Isabelle Smith and André Ferrari. Equivalence between the posterior distribution of the  
1112 likelihood ratio and a p-value in an invariant frame. *Bayesian Analysis*, 9(4):939–962, 2014.  
1113 ISSN 19316690. doi: 10.1214/14-BA877.
- 1114 66. Peter J. Rousseeuw and Annick M. Leroy. *Robust Regression and Outlier Detection*. Wiley  
1115 Series in Probability and Statistics. John Wiley & Sons, Inc., Hoboken, NJ, USA, 10 1987.  
1116 ISBN 9780471852339. doi: 10.1002/0471725382.
- 1117 67. F. Lemoine, J.-B. Domelevo Entfellner, E. Wilkinson, D. Correia, M. Dávila Felipe,  
1118 T. De Oliveira, and O. Gascuel. Renewing Felsenstein’s phylogenetic bootstrap in the era  
1119 of big data. *Nature 2018 556:7702*, 556(7702):452–456, 4 2018. ISSN 1476-4687. doi:  
1120 10.1038/s41586-018-0043-0.
- 1121 68. Aric Hagberg, Daniel A. Schult, and Pieter J. Swart. Exploring Network Structure, Dynam-  
1122 ics, and Function using NetworkX. In Gaël Varoquaux, Travis Vaught, and Jarrod Millman,  
1123 editors, *Proceedings of the 7th Python in Science Conference*, pages 11–15, Pasadena,  
CA USA, 2008. 1124
- 1125 D. V. Klopfenstein, Liangsheng Zhang, Brent S. Pedersen, Fidel Ramírez, Alex War-  
1126 wick Vesztrocy, Aurélien Naldi, Christopher J. Mungall, Jeffrey M. Yunes, Olga Botvinnik,  
1127 Mark Weigel, Will Dampier, Christophe Dessimoz, Patrick Flick, and Haibao Tang. GOA-  
1128 TOOLS: A Python library for Gene Ontology analyses. *Scientific Reports*, 8(1):10872, 12  
1129 2018. ISSN 2045-2322. doi: 10.1038/s41598-018-28948-z.
- 1130 70. Benjamin H. Good, Yves Alexandre De Montjoye, and Aaron Clauset. Performance of mod-  
1131 ularity maximization in practical contexts. *Physical Review E - Statistical, Nonlinear, and*  
1132 *Soft Matter Physics*, 81(4):046106, 4 2010. ISSN 15393755. doi: 10.1103/PHYSREVE.81.  
1133 046106/FIGURES/14/MEDIUM.
- 1134 71. Skipper Seabold and Josef Perktold. statsmodels: Econometric and statistical modeling  
1135 with python. In *9th Python in Science Conference*, 2010. 1136
- 1137 72. NCBI GEO. Evolution of gene expression during long term coexistence in a bacterial evo-  
1138 lution experiment, <https://www.ncbi.nlm.nih.gov/geo/query/acc.cgi?acc=GSE30639>.
- 1139 73. Davis S and Meltzer PS. GEOquery: a bridge between the Gene Expression Omnibus  
(GEO) and BioConductor. *Bioinformatics (Oxford, England)*, 23(14):1846–1847, 7 2007.  
1140 ISSN 1367-4811. doi: 10.1093/BIOINFORMATICS/BTM254.
- 1141 74. G. K. Smyth. limma: Linear Models for Microarray Data. *Bioinformatics and Compu-*  
1142 *tational Biology Solutions Using R and Bioconductor*, pages 397–420, 12 2005. doi:  
1143 10.1007/0-387-29362-0(\\_)23.
- 1144 75. Smyth GK. Linear models and empirical bayes methods for assessing differential expression  
1145 in microarray experiments. *Statistical applications in genetics and molecular biology*, 3(1),  
2004. ISSN 1544-6115. doi: 10.2202/1544-6115.1027. 1146

# Supplement

## Contents

|      |                                                                  |           |
|------|------------------------------------------------------------------|-----------|
| 1147 |                                                                  |           |
| 1148 | <b>S1 Barcoded transposon library construction</b>               | <b>14</b> |
| 1149 |                                                                  |           |
| 1150 | <b>S2 BarSeq experiments</b>                                     | <b>15</b> |
| 1151 | S2.1 Set-up of experiments . . . . .                             | 15        |
| 1152 | S2.2 Conditions for each experiment . . . . .                    | 15        |
| 1153 | S2.2.1 Monoculture . . . . .                                     | 15        |
| 1154 | S2.2.2 Coculture experiments . . . . .                           | 15        |
| 1155 | S2.2.3 1:10 dilution . . . . .                                   | 15        |
| 1156 | S2.2.4 Acetate exponential phase . . . . .                       | 16        |
| 1157 | S2.2.5 Glucose exponential phase . . . . .                       | 16        |
| 1158 | S2.3 DNA extraction, PCR, Sequencing . . . . .                   | 16        |
| 1159 | <b>S3 Fitness inference pipeline</b>                             | <b>16</b> |
| 1160 | S3.1 Read counting and error correction . . . . .                | 16        |
| 1161 | S3.2 Probabilistic model of read count trajectories              |           |
| 1162 | and fitness inference . . . . .                                  | 17        |
| 1163 | S3.3 Estimation of error parameters . . . . .                    | 18        |
| 1164 | S3.4 Estimation of mean fitness dynamics . . . . .               | 18        |
| 1165 | S3.5 Identification of putative outlier barcodes . .             | 19        |
| 1166 | S3.5.1 Simulations . . . . .                                     | 19        |
| 1167 | S3.6 Consequences of potential barcode fre-                      |           |
| 1168 | quency biases . . . . .                                          | 20        |
| 1169 | <b>S4 Analysis</b>                                               | <b>21</b> |
| 1170 | S4.1 Similarity of fitness effects across environments           | 21        |
| 1171 | S4.2 Network of gene-by-gene correlations . . . . .              | 21        |
| 1172 | S4.3 Genome evolution . . . . .                                  | 22        |
| 1173 | S4.4 Changes in gene expression . . . . .                        | 23        |
| 1174 | <b>List of Figures</b>                                           |           |
| 1175 | S1 Noise parameter as a function of reads . . . . .              | 19        |
| 1176 | S2 Outlier detection simulations . . . . .                       | 20        |
| 1177 | S3 Outlier examples . . . . .                                    | 20        |
| 1178 | S4 No bias in genomic position or GC content . .                 | 22        |
| 1179 | S5 Statistics of RB-TnSeq libraries . . . . .                    | 24        |
| 1180 | S6 Relationship between genomic position and                     |           |
| 1181 | fitness effect . . . . .                                         | 25        |
| 1182 | S7 Frequency trajectories of mixed culture ex-                   |           |
| 1183 | periments from CFUs . . . . .                                    | 25        |
| 1184 | S8 Measured S/L frequency dependent fitness                      |           |
| 1185 | and ecological equilibrium . . . . .                             | 26        |
| 1186 | S9 All DFEs across experiments . . . . .                         | 27        |
| 1187 | S10 Comparison of fitness effects, highlighting                  |           |
| 1188 | genes in mutated operons . . . . .                               | 28        |
| 1189 | S11 Frequency-dependent fitness effects . . . . .                | 29        |
| 1190 | S12 Fitness effect sign-flipping across environments             | 30        |
| 1191 | S13 Fitness effect sign-flipping across environments             | 30        |
| 1192 | S14 Fitness effect correlations between strains . .              | 31        |
| 1193 | S15 Fitness effects of <i>suf</i> and <i>pro</i> operons . . . . | 31        |
| 1194 | S16 Fitness effects of beneficial knockouts across               |           |
| 1195 | environments . . . . .                                           | 32        |
| 1196 | S17 Modularity of cofitness clusters . . . . .                   | 32        |

|                                                     |    |      |
|-----------------------------------------------------|----|------|
| S18 Comparison of cofitness partitionings . . . . . | 33 | 1197 |
| S19 Cofitness network comparison, across bio-       |    | 1198 |
| logical replicates . . . . .                        | 34 | 1199 |
| S20 Cofitness clustering, across biological repli-  |    | 1200 |
| cates . . . . .                                     | 35 | 1201 |
| S21 Cofitness cluster reassignment . . . . .        | 36 | 1202 |
| S22 Biofilm-associated genes in the same clusters   | 37 | 1203 |
| S23 Correlations between cofitness across strains . | 37 | 1204 |
| S24 Variance in fitness effect across environment   |    | 1205 |
| and EcoliNet score. . . . .                         | 38 | 1206 |
| S25 Shortest (graph) distance between genes in      |    | 1207 |
| EcoliNet predicts if genes stay correlated          |    | 1208 |
| across genetic background . . . . .                 | 38 | 1209 |
| S26 Relationship between deleterious mutations      |    | 1210 |
| and evolutionary outcomes . . . . .                 | 39 | 1211 |
| S27 Fitness-gene expression change relationship .   | 40 | 1212 |
| S28 Establishment of mutation by knockout fitness   | 41 | 1213 |
| S29 Linear model to explore correlation of gene     |    | 1214 |
| expression changes with knockout fitness ef-        |    | 1215 |
| fects . . . . .                                     | 42 | 1216 |
| S30 Restricting analysis of Figure S29 to exclude   |    | 1217 |
| poorly expressed genes . . . . .                    | 42 | 1218 |
| S31 Fitness effects predict EcoliNet node degree .  | 43 | 1219 |

## S1 Barcoded transposon library construction

To construct the barcoded transposon libraries, we isolated subclones of REL606, REL11555 (6.5k S), and REL11556 (6.5k L), all gifts of Richard Lenski (Michigan State University). Transposon mutagenesis was performed as previously described (40, 41) by mating each LTEE clone with an *E. coli* WM3064 donor (Diaminopimelic acid [DAP] auxotroph and *pir*<sup>+</sup>) containing previously described (40) randomly barcoded Tn5 plasmids with a kanamycin cassette and an R6K origin of replication. The LTEE clones were grown in DM2000 (Davis Minimal Media with 2000mg/L D-glucose), and the donor was grown in LB/Kan, all to mid-log phase. After washing the cultures, each LTEE culture was then mixed with the donor in a 1:1 ratio, then placed on 0.45 μM nitrocellulose filters (Millipore cat. no. HAWP04700) on top of a 1% agar plate with EZ-MOPS rich, defined media (Teknova cat. no. M2105) + 20mM sodium pyruvate ('EZ-py') + 0.3mM DAP. The rich media was chosen because it had a number of different carbon sources (glucose, amino acids, pyruvate) and sufficient amounts of all other required macro/micronutrients, lessening the chances of substantial negative selection in the growth media. After conjugation, the filters were picked up and placed in rich media; subsequently, the resuspended cells were plated on EZ-py agar plates supplemented with 50 μg/mL kanamycin. After approximately 24hrs of growth at 37C, colonies were scraped up and grown in EZ-py liquid media with 50 μg/mL kanamycin until OD~1; we then saved the cultures in several 10% glycerol stocks. Transposon insertion mapping (Tn-Seq) libraries were prepared as previously described (40); libraries were then sequenced on the Illumina HiSeq 4000 (150PE) at the Vincent J. Coates Genomics Sequencing Laboratory at UC Berkeley. The resulting sequencing data



1253 was used to create a table relating each barcode to a ge-  
1254 nomic insertion location, using a previously developed script  
1255 (MapTnSeq.pl) (40).

## 1256 S2 BarSeq experiments

1257 **S2.1 Set-up of experiments.** To start a BarSeq experi-  
1258 ment, we first unfroze 1mL glycerol stock of the REL606,  
1259 6.5k S and/or 6.5k L transposon libraries and transferred  
1260 the entirety to 10mL EZ-py media (media used for library  
1261 construction) in 50mL glass erlenmeyer flasks, which were  
1262 grown for 16-24hrs at 37C, shaken at 120rpm. All cultures  
1263 for all experiments were grown with the same shaker, in the  
1264 same 37C warm room. In several experiments where we mea-  
1265 sured fitness effects of 6.5k S/L barcoded libraries at various  
1266 ecotype frequencies, we also grew the wild type S/L with the  
1267 same media, under the same conditions. The next day, we  
1268 washed the cultures by pelleting via centrifugation for 3 min-  
1269 utes at 5000rpm, aspirating the supernatant, and resuspend-  
1270 ing in DM0 (Davis Minimal Media without a carbon source)  
1271 three times. After thoroughly vortexing the cultures, we  
1272 transferred them 1:1000 to the appropriate media in  $n$  flasks  
1273 (see below)—depending on the experiment, we used different  
1274 numbers of flasks and different sizes, either 10mL media in  
1275 50mL glass flasks or 200mL media in 1L glass flasks (same  
1276 ratios, scaled up). We used multiple flasks and larger flasks to  
1277 increase the total population size, decreasing fluctuations due  
1278 to genetic drift. We then performed two more transfers in the  
1279 appropriate conditions for the experiment to help physiologi-  
1280 cally adapt the cultures to the conditions. If we were doing  
1281 a coculture experiment, we would mix the cultures at the ap-  
1282 propriate frequencies during the second transfer. If we used  
1283 multiple flasks in an experiment, we would sample an equal  
1284 amount of culture from each flask into a microcentrifuge or  
1285 Falcon tube, thoroughly mix the cultures, and redistribute  
1286 among the same number of flasks with new media—thus, the  
1287 cultures distributed in multiple flasks were effectively all part  
1288 of the same population. After the third transfer, we would  
1289 collect cells for day 0 of the experiment, and use that culture  
1290 to start two biological replicates that are independently prop-  
1291 agated for the remainder of the experiment. All cultures were  
1292 grown at 37C, shaken at 120rpm. Cells were harvested at  
1293 defined time points by centrifugation at 15000rpm for 10min  
1294 of ~60mL culture for all experiments except Ac Exp (10mL)  
1295 and Mono 2 (30mL), pooling culture from all flasks in an ex-  
1296 periment/replicate at equal ratios. Subsequently, the pellets  
1297 were stored at -80C until the experiment was finished.

## 1298 S2.2 Conditions for each experiment.

1299 **S2.2.1 Monoculture.** For the Mono (1) experiments, we prop-  
1300 agated the libraries alone in DM25 (Davis Minimal Media  
1301 with 25mg/L D-glucose) in 5x 50mL flasks over the course  
1302 of 4 days. For the REL606 Mono 2 experiment, we used  
1303 3x 50mL flasks over the course of 8 days, with four biolog-  
1304 ical replicates in DM25. We transferred cultures 1:100 ev-  
1305 ery 24hrs, and took the number of generations per transfer as  
1306  $\log_2 100$ .

1307 **S2.2.2 Coculture experiments.** As mentioned above, we  
1308 started wildtype cultures of 6.5k S and/or L clones (same  
1309 clones used to make the RB-Tn libraries) at the same time and  
1310 with the same procedure as the library cultures (Table 1, main  
1311 text), and mixing the cultures at the appropriate frequencies at  
1312 the second "adaptation" serial transfer. We measured the eco-  
1313 logical equilibrium frequency to be approximately 15 – 20%  
1314 S (Figure S8), so we ensured that the S frequency was started  
1315 in that range for the "ecological equilibrium" experiments.  
1316 We started the "S/L in majority" experiments such that the  
1317 minority ecotype was  $> 10\%$  of the total population (Figure  
1318 S7).

1319 We used DM25 media and propagated the cultures for 4 days,  
1320 except for S in maj 2/3 where we used 6 days, transferring  
1321 1:100 every 24hrs ( $\log_2 100$  generations) for all coculture ex-  
1322 periments. For the Eco Eq 1 experiment, we mixed both S  
1323 and L libraries in the same cultures along with wildtype L,  
1324 using 4x 1L flasks. For the Eco Eq 2 experiments, S and  
1325 L libraries were in separate cultures, both with wildtype S  
1326 and L set at the appropriate frequency, with RB-Tn library  
1327 frequency around 5 – 10% (Figure S7); cultures were propa-  
1328 gated in 10x 50mL flasks. For the L in Maj and S in Maj 1  
1329 experiments, we mixed wt L + S library and wt S + L library,  
1330 respectively; cultures were propagated in 10x 50mL flasks.  
1331 For the S in maj 2/3 experiments, we mixed wt S with S+L  
1332 and L libraries respectively; cultures were propagated in 4x  
1333 1L flasks.

1334 We measured the frequency of S/L in the population by plat-  
1335 ing and counting colonies at the end of a transfer on TM  
1336 plates (tetrazolium maltose; 10g/L tryptone [Sigma T7293],  
1337 1g/L yeast extract [Sigma Y1625], 5g/L NaCl, 16g/L agar,  
1338 10g/L maltose, 1mL/L 5% TTC [Sigma T8877]), where S  
1339 appears as red colonies and L appears as white colonies,  
1340 previously used in (46). We could also measure the fre-  
1341 quency of cells from RB-Tn libraries by plating the cultures  
1342 on LB/Kanamycin plates, as the transposon has a kanamycin  
1343 resistance cassette (Figure S7). We diluted all cultures (at  
1344 the end of a cycle) in DM0. Dilution rates varied over  
1345 experiments: in Eco Eq 1, we diluted cultures by a fac-  
1346 tor of  $2 * 10^{-5} mL^{-1}$  to plate on both TM and LB/Kan  
1347 plates, in Eco Eq 2 we used dilution rates of  $10^{-5} mL^{-1}$   
1348 and  $10^{-4} mL^{-1}$  to plate on TM and LB/Kan plates respec-  
1349 tively, in the L in Maj and S in Maj 1 experiments we used  
1350 a  $2 * 10^{-5} mL^{-1}$  dilution rate to plate on just TM plates,  
1351 and in the S in maj 2/3 experiments we used dilution rates  
1352 of  $2 * 10^{-5} mL^{-1}$  and  $2 * 10^{-4} mL^{-1}$  to plate on TM and  
1353 LB/Kan plates respectively.

1354 **S2.2.3 1:10 dilution.** We propagated cultures with a 1:10 di-  
1355 lution, instead of the standard LTEE dilution rate of 1:100,  
1356 to investigate the effect of a lengthened stationary phase rel-  
1357 ative to exponential phase. We used DM27.8 media (Davis  
1358 Minimal Media with 27.8mg/L D-glucose), because the con-  
1359 centration of glucose would fall to 25mg/L after dilution.  
1360 We used 1x 1L flask for each library culture (180mL me-  
1361 dia + 20mL culture), propagating the cultures for 8 days ev-  
1362 ery 24hrs with  $\log_2 10$  generations per day. We pelleted and  
1363 saved cultures every other day (0,2,4,6,8).

1364 **S2.2.4 Acetate exponential phase.** We sought to measure  
1365 knockout fitness effects when the RB-Tn libraries were kept  
1366 in acetate exponential phase, where we used DM2000-acetate  
1367 (Davis Minimal Media with 2000mg/L Sodium Acetate) and  
1368 grew the cultures in 1x 50mL flask. We first measured ex-  
1369ponential growth rates for wt REL606, L, and S clones in  
1370 DM2000-acetate, which were approximately 0.08/hr, 0.12/hr,  
1371 and 0.18/hr respectively. We also observed that all cultures  
1372 were still in mid-exponential phase at  $OD \sim 0.6$ . So, if we  
1373 started at initial  $OD_0$  of 0.09, 0.03, 0.008 for REL606, L, and  
1374 S respectively, the cultures would end up at  $OD \sim 0.6$  after 24  
1375 hours. Thus, for each transfer, we would measure the actual  
1376 OD for each culture (after 24hrs of growth) and transfer the  
1377 appropriate volume of old culture to new 10mL DM2000-  
1378 acetate such that the final concentration was the appropriate  
1379  $OD_0$ . We recorded the number of generations for each cycle  
1380 as  $\log_2 OD_f / OD_0$ . Due to the variable number of genera-  
1381 tions per transfer for each genetic background (owing to dif-  
1382 ferent growth rates), we collected samples at days 0,2,4,6,8  
1383 for REL606; 0,1,2,4,5,6 for L; 0,1,2,3,4,5 for S.

1384 **S2.2.5 Glucose exponential phase.** We measured knockout  
1385 fitness effects in glucose exponential phase with DM25 me-  
1386 dia in 1x 1L flask. We measured the length of DM25 expo-  
1387 nential phase to be about 8.25 hrs for REL606, and 5.25 hrs  
1388 for both S and L after a 1:100 dilution into new media. For  
1389 the adaptation phase, we did two full 24hr cycles of growth  
1390 in DM25, followed by one cycle of growth for ~8hrs and  
1391 ~5hrs for REL606 and S/L, respectively. After the adaptation  
1392 phase, we transferred cultures 1:100 into new DM25 media  
1393 (warmed to 37C) four times, after 7.5-8hrs for REL606 and  
1394 4.5-5hrs for S and L. As DM25 media is quite dilute and thus  
1395 OD measurements are relatively inaccurate, we estimated the  
1396 number of cells that were transferred by plating the cultures  
1397 on LB plates at a  $2 * 10^{-5} mL^{-1}$  dilution rate and counting  
1398 colonies, calculating the number of generations for that trans-  
1399 fer as  $\log_2 100 CFU_f / CFU_0$ . We only ended up including  
1400 the first two transfers of the REL606 library experiment (time  
1401 points 0,1,2), as it was apparent from CFUs that the third  
1402 transfer resulted in a large bottleneck owing to a smaller than  
1403 expected population size before the transfer, likely because  
1404 of slower than expected growth.

1405 **S2.3 DNA extraction, PCR, Sequencing.** After the exper-  
1406 iment was finished, pellets were pulled from the -80C  
1407 freezer and genomic DNA was extracted with the Qiagen  
1408 DNeasy tissue and blood extraction kit (cat no. 69504),  
1409 eluted in double distilled water with typical yields around  
1410 50ng/ $\mu$ L. DNA barcodes were amplified from gDNA sam-  
1411 ples via PCR with Q5 Hot Start Polymerase (NEB, cat.  
1412 no. M0493S); 50ul reactions were composed of 5 $\mu$ L PCR  
1413 primers, 5 $\mu$ L gDNA, 10 $\mu$ L 5x buffer, 10 $\mu$ L GC enhancer,  
1414 1 $\mu$ L dNTPs, 0.5 $\mu$ L Q5 polymerase, 18.5 $\mu$ L water. We used  
1415 custom dual-indexed primers that contained binding sites up-  
1416 and down-stream of the barcode region, along with the neces-  
1417 sary Illumina read/index binding sites; fwd primer (AATGAT  
1418 ACGGCG ACCACC GAGATC TACTACT CTTTCC CTA-  
1419 CAC GACGCT CTTCCG ATCT N<sub>n</sub>XXXXXX GTGCAG

CTGCAG CGTACG) where X stands for the custom for- 1420  
ward 6bp index, and N<sub>n</sub> is 1-4 random nucleotides, vary- 1421  
ing with the primer pair; rev primer (CAAGCA GAAGAC 1422  
GGCATA CGAGAT XXXXXX GTGACT GGAGTT CA- 1423  
GACG TGTGCT CTTCCG ATCTGA TGTCCA CGAGGT 1424  
CTCT) where X stands for standard Illumina 6bp IT index. 1425  
We used a different primer pair for each gDNA sample from 1426  
a different experiment/replicate/time point, so that we could 1427  
demultiplex the samples after sequencing. The PCR program 1428  
was 4min at 95C, [30sec at 95C, 30sec at 55C, 30sec at 72C] 1429  
x25 cycles, 5min at 72C. We verified that we had the correct 1430  
PCR products via agarose gel electrophoresis. All PCR reac- 1431  
tions were then pooled and cleaned with the Zymo DNA 1432  
Clean and Concentrator kit (cat. no. D4013), and eluted in 1433  
double distilled water. The final pooled sample was then se- 1434  
quenced on an Illumina HiSeq 4000 (50SR) at the Vincent J. 1435  
Coates Genomics Sequencing Laboratory at UC Berkeley. 1436

### 1437 S3 Fitness inference pipeline

1438 **S3.1 Read counting and error correction.** We first pro- 1438  
cessed the raw (demultiplexed) sequencing reads using a pre- 1439  
viously developed Perl script (40, 41) that pulls out the bar- 1440  
code sequence by trimming regions corresponding to the se- 1441  
quencing primers and regions up/downstream of the barcode, 1442  
as well as discarding reads that do not match the secondary 1443  
sequencing index or have insufficiently high quality scores 1444  
(MultiCodes.pl). Then, counts of unique barcodes are tabu- 1445  
lated to get a table corresponding barcode sequence to counts. 1446  
However, due to errors that arise during PCR and sequenc- 1447  
ing, some of the barcode reads acquire mutations that would 1448  
prevent them from directly mapping to a transposon inser- 1449  
tion location. Thus, we must correct for these sequencing er- 1450  
rors by matching mutated barcodes to their parent, and merg- 1451  
ing the read counts together. The aforementioned Perl script 1452  
identifies off-by-one barcode pairs; if the minority barcode 1453  
(the one with fewer counts) unambiguously maps to a single 1454  
majority barcode, the barcode counts are merged. To detect 1455  
larger mutational distances between the derived and parent 1456  
barcodes, we computed the Levenshtein (edit) distance be- 1457  
tween pairs of barcodes (as implemented in the Python C 1458  
package Levenshtein (63)). Barcode read counts were 1459  
merged if the edit distance was 4 or less, and if the minority 1460  
barcode only mapped to one majority barcode at the mini- 1461  
mum edit distance. 1462

1463 We then used previously acquired TnSeq data that maps the 1463  
barcode identity to its transposon insertion location in order 1464  
to identify which gene (if any) the barcoded transposon dis- 1465  
rupted. Transposons that hit the first or last 5% of the gene 1466  
sequence were excluded, as it is possible that these inser- 1467  
tions do not result in disruption of production of the gene product. 1468  
To ensure that barcodes at least begin their trajectories at a 1469  
sufficiently high read count, if there were barcodes within a 1470  
gene with low initial counts,  $r_{0,i} < 80$ , we summed the low- 1471  
est (initial) count barcode into the next-lowest count barcode 1472  
until  $\min_i r_{0,i} \geq 80$ . We restricted our analysis to genes that 1473  
had  $\geq 4$  barcodes, allowing us to gain confidence that the 1474  
measured knockout fitness is not dependent on rare fluctua- 1475

| Library | # genes hit $\geq 3$ times | # barcodes | % bc reads mapped |
|---------|----------------------------|------------|-------------------|
| REL606  | 3,401                      | 609,854    | 84%               |
| 6.5k S  | 3,382                      | 522,253    | 84%               |
| 6.5k L  | 2,877                      | 157,260    | 89%               |

**Table S1.** Summary of statistics of constructed RB-TnSeq libraries.

tions or secondary mutations. Additionally, some barcodes went extinct during the course of the experiment, either due to genetic drift or selection; if a barcode went extinct, i.e. has 0 counts from  $t_{ext}$  to  $T$ , we would trim all time points after, but not including,  $t_{ext}$ . We eliminated barcodes that go extinct after just one time point.

### S3.2 Probabilistic model of read count trajectories and fitness inference.

To infer the fitness of individual genotypes from BarSeq count data, we must first understand what frequency trajectories we would expect for a given fitness, and how technical noise (e.g. from sample preparation and sequencing) and genetic drift affect those trajectories. Consistent with previous work (30, 31, 35), we construct a maximum-likelihood estimator to infer fitness from trajectories of barcode read counts, using a deterministic approximation of frequency dynamics.

On average, when the frequency of a lineage is sufficiently small  $f_{t,i} \ll 1$ , the frequency dynamics will exponentially grow/decay according to the genotype fitness,  $s$ , as well as the mean fitness of the population,  $\bar{x}_t$  (see section S3.4),

$$\langle f_{t,i} \rangle = f_{0,i} e^{(s - \bar{x}_t)t}$$

We measured the time in *generations*, which we measured for each time point in each experiment (see section S2.2). The reason we used a timescale of  $1/\text{generation}$  instead of e.g.  $1/\text{cycle}$  was to be able to better compare the magnitude of effects across experiments—e.g. the two exponential phase experiments had varying numbers of generations from cycle-to-cycle and between strains (due to differences in exponential growth rates). However, the fitness effects can be scaled by a factor of approximately 6.64 to get per-cycle fitness effects, at least in the 1:100 serial dilution experiments. The two sources of noise—genetic drift and measurement noise—both arise from counting processes, so the combined noise will follow  $\text{var}(f_{t,i}) \propto \langle f_{t,i} \rangle$  (see section S3.3). To account for the inherent discreteness of counting sequencing reads—especially important to accurately model deleterious genotypes that quickly drop to low frequencies—we modeled the observed counts at time  $t$  (always measured in generations) of barcode  $i$  inserted in a given gene,  $r_{t,i}$ , as a negative binomial random variable,

$$r_{t,i}|s, f_{0,i} \sim \text{NB}(\mu_{t,i}, c_t) \quad (1)$$

$$\langle r_{t,i} \rangle = \mu_{t,i} \quad (2)$$

$$\text{var}(r_{t,i}) = c_t \langle r_{t,i} \rangle \quad (3)$$

$$\mu_{t,i} = R_t f_{0,i} e^{(s - \bar{x}_t)t} \quad (4)$$

Where  $R_t$  is the total number of counts, and  $c_t$  is the measured variance parameter. The final likelihood for the fitness,

$s$ , of a given gene knockout is obtained by numerically integrating over  $f_{0,i}$  ('integrated likelihood' with a flat prior)—incorporating the uncertainty in the intercept nuisance parameters into the fitness estimate and turning the problem into a one-dimensional maximum likelihood—and then combining the likelihoods of all barcodes inserted into the gene,

$$P(r_i|s, f_{0,i}) = \prod_t \frac{\Gamma(r_{t,i} + \frac{\mu_{t,i}}{c_t - 1})}{\Gamma(\frac{\mu_{t,i}}{c_t - 1}) \Gamma(r_{t,i} + 1)} \frac{(c_t - 1)^{r_{t,i}}}{c_t^{r_{t,i} + \frac{\mu_{t,i}}{c_t - 1}}} \quad (5)$$

$$\mathcal{L}(s|r) = \prod_i \int df_{0,i} P(r_i|s, f_{0,i}) \quad (6)$$

The point estimate of the knockout fitness,  $\hat{s}$ , is then numerically computed as the maximum likelihood, and the standard error is approximated as the inverse, square-root observed information,

$$\hat{s} = \underset{s}{\text{argmax}} \log \mathcal{L}(s|r) \quad (7)$$

$$\text{std } \hat{s} = 1 / \sqrt{-\partial_s^2 \log \mathcal{L}(s|r)|_{\hat{s}}} \quad (8)$$

We ran biological replicates for all experiments reported here; to obtain combined genotype fitness estimates across replicates we simply multiplied the likelihoods together, repeating the maximum likelihood procedure.

As the majority of barcoded knockouts are neutral or nearly so ( $s \approx 0$ ), we must have a method to distinguish between likely neutral and selected knockout mutations; this can be accomplished by computing a p-value under the null hypothesis  $s = 0$ . For ease of computation and generality we compute the p-value as the posterior probability that the likelihood ratio between null and alternative hypotheses is greater than 1, i.e. the probability that the data more strongly support the null hypothesis over the alternative,

$$p = P_{s|r} \left( \frac{\mathcal{L}(0|r)}{\mathcal{L}(s|r)} > 1 \right)$$

$$P(s|r) \propto \mathcal{L}(s|r)$$

This convenient definition has been shown to be equivalent to the frequentist definition of the p-value using a likelihood ratio test statistic (if the distribution is invariant under transformation) (64, 65), and does not require asymptotic approximations.

In practice, this p-value can be calculated by first, finely discretizing the likelihood curve along  $s$  and normalizing it to get the posterior,



$$P_j(s_j|r) = \frac{\mathcal{L}(s_j|r)}{\sum_j \mathcal{L}(s_j|r)} \quad (9)$$

Then, calculating the log-likelihood ratio along all discretized  $s$  values,

$$\text{LLR}_j = \log \mathcal{L}(0|r) - \log \mathcal{L}(s_j|r) \quad (10)$$

And finally, summing to get the posterior probability that the data supports the null hypothesis more than the alternative, where  $I[\cdot]$  is the indicator function,

$$p = \sum_j I[\text{LLR}_j > 0] P_j(s_j|r)$$

We used the standard method of Benjamini & Hochberg to control for the false discovery rate at  $\alpha = 0.05$ .

**S3.3 Estimation of error parameters.** In order to estimate fitness of individual genotypes from BarSeq data, we must first obtain an estimate of the error parameters for each time point in the experiments. There are two distinct sources of noise in our BarSeq measurements—measurement (technical) noise, arising from library preparation and sequencing error, which is uncorrelated in time, and variance due to genetic drift, which accumulates over time. Both sources of noise are count processes, where the variance of barcode population frequencies will be proportional to the mean,

$$\langle f_{t,i} \rangle = \frac{\langle r_{t,i} \rangle}{R_t} \propto \text{var}(f_{t,i})$$

In order to eliminate the dependence of the variance on the mean, we apply a variance-stabilizing transformation,

$$\phi_{t,i} \equiv \sqrt{f_{t,i}}$$

The variance of barcode frequencies of neutral lineages over two time points will then depend on the variance that has accumulated due to genetic drift, as well as the technical noise at the sampled time points. If there are sufficiently many read counts/individuals such that the central limit theorem applies, the variances will simply be additive,

$$\kappa_{j,k} \equiv \text{var}(\phi_{i,j} - \phi_{i,k}) = \zeta_j + \zeta_k + \frac{|j-k|}{4N_e} \quad (11)$$

Where  $\zeta_t$  is the technical noise at time point  $t$ ,  $N_e$  is the effective population size, and  $|j-k|$  is the number of transfers performed between times  $j$  and  $k$ . The above equation defines a set of linear equations, with  $\zeta_t$  and  $N_e$  as unknown parameters.

We can measure  $\kappa_{j,k}$  for all possible combinations of  $t_j$  and  $t_k$  given large enough set of neutral barcodes. Our RB-TnSeq libraries have a large number of transposons that were inserted into intergenic regions, the vast majority of which presumably have no fitness effect; thus, we use these intergenic barcodes as our set of putatively neutral barcodes. We confirmed that our measured  $\kappa_{j,k}$  did not systematically vary

as a function of  $r_j$  (Figure S1), indicating that the expected mean-variance relationship,  $\text{var}(f_{t,i}) \propto \langle f_{t,i} \rangle$ , is consistent with our data.

We only included intergenic barcodes that satisfy  $50 < r_{t,i} < 500$ , as our computation depends on having sufficiently many counts such that the central limit theorem applies, and barcodes at a higher frequency are more likely to have acquired secondary mutations and be impacted by selection. In order to further guard against the effects of potential 'outlier' barcodes (those with non-neutral fitnesses), we compute variance estimates,  $\hat{\kappa}_{j,k}$ , with a more robust measurement of variability, the median absolute deviation (MAD),

$$\psi_{i,j,k} \equiv \phi_{i,j} - \phi_{i,k} \quad (12)$$

$$\text{MAD}_{j,k} = \text{med}_i |\psi_{i,j,k} - \text{med}_i \psi_{i,j,k}| \quad (13)$$

$$\hat{\kappa}_{j,k} = \left( \frac{\text{MAD}_{j,k}}{0.67449} \right)^2 \quad (14)$$

We resampled barcodes with replacement (standard bootstrapping) 500 times to compute the relative errors on the  $\hat{\kappa}_{j,k}$  measurements. To decompose variability into the correlated ( $1/N_e$ ) and uncorrelated ( $\zeta_t$ ) components, we numerically minimized squared error of the expected relationship (eq. 11) between the noise parameters and the measured  $\hat{\kappa}_{j,k}$ , with inverse variance weighting,

$$\zeta, N_e = \underset{\zeta, N_e}{\text{argmin}} \sum_{j,k} \frac{\left( \zeta_j + \zeta_k + \frac{|j-k|}{4N_e} - \hat{\kappa}_{j,k} \right)^2}{\text{var}(\hat{\kappa}_{j,k})}$$

We subjected the minimization to the constraint that  $\zeta_t \geq \frac{1}{4R_t}$ , i.e. technical noise must be at least as large as variance due to sampling. After converting the variance parameters from frequencies back to read counts, the total marginal variance parameter at a single time point is,

$$\hat{c}_t = (4\zeta_t + 1/N_e)R_t$$

The number of intergenic barcodes included varies across RB-TnSeq libraries, experiments, and time points, but approximately on the order of  $\sim 10^4$  intergenic barcodes are used to estimate the variance parameters. The errors on the estimated  $\hat{c}_t$  are generally small ( $\lesssim 1\%$ ), so the point estimate  $\hat{c}_t$  was directly used for all downstream inferences.

**S3.4 Estimation of mean fitness dynamics.** As beneficial mutations increase in frequency, and deleterious mutations decrease, the mean fitness of the population changes over time, impacting the rate of frequency change of all genotypes in the population. To estimate the mean fitness dynamics for each experiment, we can track the dynamics of neutral genotypes, again using the large set of intergenic barcodes. We obtain an estimate of the mean fitness between times 0 and  $t$  by simply taking the negative log slope over many barcodes,

$$\hat{x}_{t,i} = -\frac{1}{t} \left[ \log \left( \frac{r_{t,i}}{R_t} \right) - \log \left( \frac{r_{0,i}}{R_0} \right) \right]$$

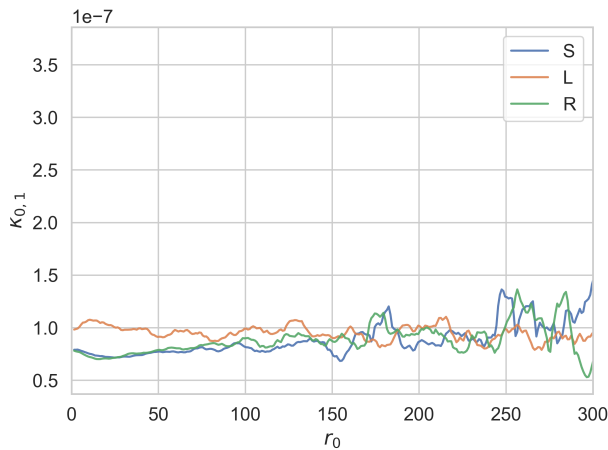

**Fig. S1.** The measured noise parameter  $\kappa_{j,k}$  is consistently approximately constant as a function of initial number of barcode reads. Data is from S/L/REL606 monoculture experiments, replicate 1. Curves are smoothed with a moving average,  $\pm 2$  reads.

As detailed in the previous section, it is advantageous to use robust forms of estimation to guard against the presence of outliers. Groups of  $\sim 100$  randomly selected intergenic barcodes with  $r_{t,i} < 500$  were summed together to create "super-barcodes", in order to improve individual estimates. The mean fitness  $\hat{x}_{t,i}$  was estimated for each super-barcode separately, and then the final estimate  $\hat{x}_t$  was obtained by taking the median over all super-barcodes. The standard error was estimated via the median absolute deviation between all super-barcodes, analogous to equations 13-14. Again, the point estimate  $\hat{x}_t$  is used for all downstream analyses, as mean fitness error was consistently small.

**S3.5 Identification of putative outlier barcodes.** We observed that some barcodes had trajectories that noticeably differed from the rest of the barcodes within the genotype, likely caused by the presence of secondary (selected) mutations that arose elsewhere in the genome or rare frequency fluctuations. We observed outlier barcodes with both beneficial and deleterious trajectories relative to the rest of the barcodes within the genotype. Problematically, some of these outlier barcodes were at high abundance relative to the other barcodes in the genotype, thus dominating the genotype fitness estimate. This necessitated a need to either accommodate outliers in our fitness estimation procedure or detect and reject outliers. We found that a number of robust estimators that we explored (e.g. maximum median/trimmed likelihood) had unreasonably high variance in fitness given our data ( $\text{std } \hat{s} \gtrsim \hat{s}$ ). Thus, we opted to use a method to detect and reject outlier barcodes within genotypes. We based our outlier detection method on the resistant diagnostic  $RD_i$  introduced by Rousseeuw and Leroy (1987) (66), a high-breakdown measure of statistical deviation.

For every genotype with at  $n_{bc} \geq 4$  unique barcodes, we computed a fitness estimate for each barcode,  $\hat{s}_i$ , via maximum likelihood (eqs. 5-8). We then used a resampling approach to randomly sample 200 different combinations of  $n_r = \lceil n_{bc}/2 \rceil$  barcodes, where samples are labeled  $J$ . To get

an estimate of the 'typical' fitness,  $\hat{s}_{J,typ}$ , of the barcodes within a gene, we either take the weighted median ( $n_r < 10$ ) or weighted trimmed mean ( $n_r \geq 10$ , trim 30% off each tail) of the resampled barcode fitnesses, where in both cases, samples are weighted by their inverse variance,  $w_i = 1/(\text{var } \hat{s}_i)$ . The weighted median is used for low number of samples, while the trimmed weighted mean is used for high number of samples, because the trimmed weighted mean generally has lower sampling variance when the number of samples remaining after trimming is sufficiently large. To compare the strength of evidence for a fitness of  $\hat{s}_i$  or  $\hat{s}_{J,typ}$  for barcode  $i$ , we compute the likelihood ratio,

$$LR_{J,i} = \log \frac{\mathcal{L}_i(\hat{s}_i|r_i)}{\mathcal{L}_i(\hat{s}_{J,typ}|r_i)}$$

The deviation of barcode  $i$  from the rest of the barcodes in the genotype is then,

$$u_i = \max_J \frac{LR_{J,i}}{\text{med}_i LR_{J,i}}$$

The final resistant diagnostic is finally calculated as a standardized version of  $u_i$ ,

$$RD_i = \frac{u_i}{\text{med}_i u_i}$$

If  $RD_i > \text{cutoff}$ , then barcode  $i$  is considered an outlier and thrown away.

**S3.5.1 Simulations.** To determine an appropriate cutoff value, we performed simulations of the data generating process, and calculated the  $RD$  for each barcode within a simulated gene using the above method. Specifically, we simulated trajectories of lineage frequencies with  $s \in \{-0.02, 0, 0.02\} \text{ gen}^{-1}$  with the standard diffusion approximation, assuming  $f \ll 1$ ,

$$\begin{aligned} \partial_t f &= sf + \sqrt{\frac{f}{N_e}} \eta(t) \\ \langle \eta(t) \rangle &= 0 \\ \langle \eta(t) \eta(t') \rangle &= \delta(t - t') \end{aligned}$$

We 'observed' trajectories at the end of each 'day' ( $\approx 6.64$  gen) for 4 days, and added measurement noise,

$$\begin{aligned} \phi_t &\equiv \sqrt{f_t} \\ \phi_t^{obs} | \phi_t &\sim \mathcal{N}(\phi_t, \zeta) \end{aligned}$$

We used  $N_e = 10^8 \text{ day}$  and  $\zeta = 2 * 10^{-8}$ . We then grouped 20 simulated lineages together into a 'gene' (approximate median number of barcodes per gene in our libraries), with  $n \in \{1, 2, 3\}$  selected lineages (of the same sign), and the rest as neutral lineages. After calculating the  $RD$  for each simulated gene, we calculated the true positive/negative rate for calling a lineage as an outlier for a given threshold (Figure S2).

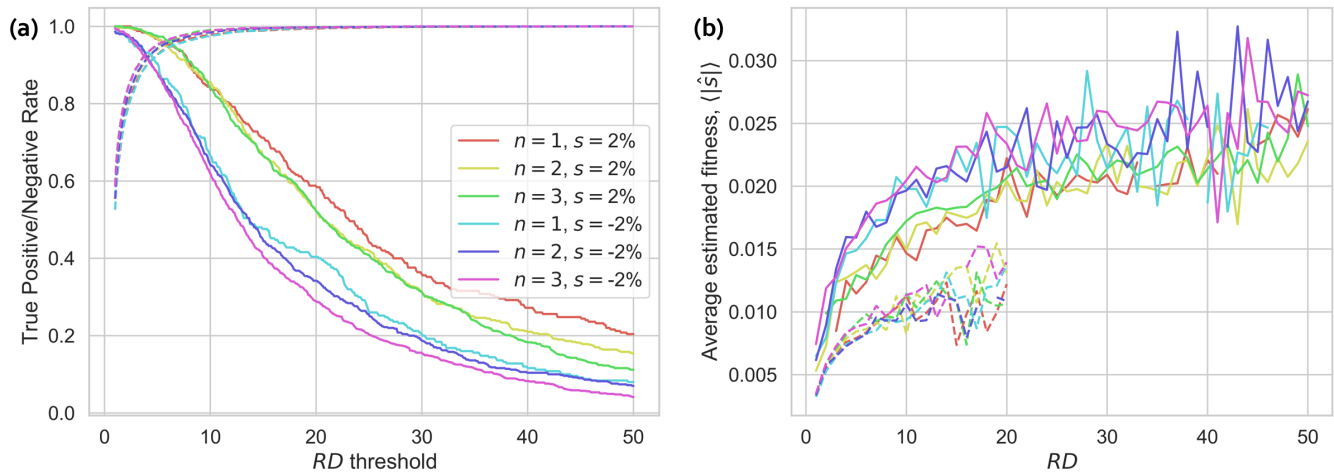

**Fig. S2.** (a) Detection of selected, outlier barcodes in otherwise neutral genes. Dotted lines are the true negative rate, solid lines are the true positive rate. (b) Average inferred fitness (ie apparent fitness, differing from the true fitness by fluctuations) of barcodes with different  $RD$ s. Dotted lines are from neutral barcodes, solid lines are outlier barcodes. ‘Neutral’ barcodes with  $RD \approx 6$  have sufficiently large fluctuations to have trajectories that appear to have a 1% deviation from neutrality.

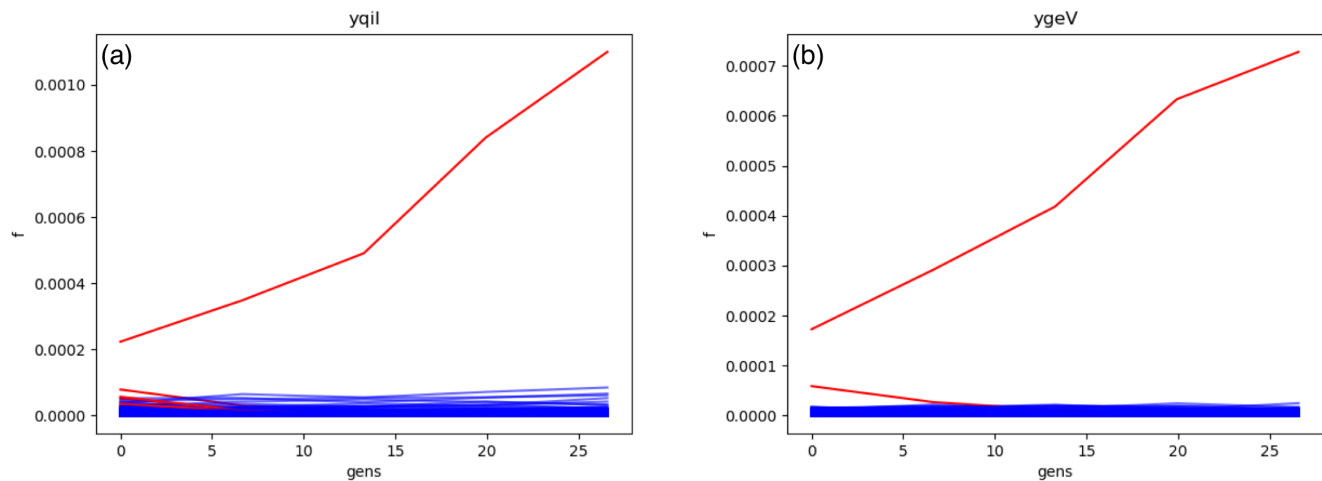

**Fig. S3.** Examples of high-abundance outlier barcodes detected in otherwise neutral genotypes. Red barcodes were called as outliers. Examples taken from an experiment with the 6.5k S library in co-culture with L at the equilibrium frequency.

1695 We can see that the method can sensitively detect relatively  
 1696 small,  $\sim 2\%$ , differences in fitness, while minimizing the  
 1697 number of neutral barcodes that are incorrectly thrown away.  
 1698 True positive rate decreases somewhat if there are multiple  
 1699 outlier barcodes within a gene, but the difference appears to  
 1700 be minimal, as expected from the construction of the  $RD$  as  
 1701 a high-breakdown deviance statistic. From the simulations,  
 1702 we chose a cutoff of 6, which only falsely throws out  $\sim 5\%$   
 1703 of neutral lineages, while detecting  $\sim 85 - 95\%$  of outliers.  
 1704 This threshold also seems to empirically work with our data,  
 1705 detecting at least the most obvious outliers (see e.g. Figure  
 1706 S3).

1707 **S3.6 Consequences of potential barcode frequency**  
 1708 **biases.** One major assumption of the above analyses is that  
 1709 the frequency of barcodes from BarSeq data represents an *un-*  
 1710 *biased* estimate of the actual frequency of barcoded cells in  
 1711 the population. While we expect this assumption to generally  
 1712 hold, there are two major ways that this assumption could be

1713 violated: (1) if barcodes are differentially amplified due to  
 1714 e.g. differences in GC content, and (2) if genomic regions  
 1715 near the chromosomal origin of replication are present at a  
 1716 higher copy number due to fast growth. Both types of biases  
 1717 have been observed in some previous RB-TnSeq experiments  
 1718 (40, 41). We can check for the presence of frequency biases  
 1719 by comparing the inferred value of the error parameter  $\kappa_t$   
 1720 (see section S3.3) for barcodes with different GC contents  
 1721 and across genomic positions, as biases in frequency mea-  
 1722 surements will change the apparent strength of genetic drift.  
 1723 We see that  $\kappa_t$  generally does not change across these con-  
 1724 ditions (Figure S4), and thus the aforementioned sources of  
 1725 frequency biases do not seem to be particularly prevalent or  
 1726 strong in our system.

1727 Of course, other unknown sources of frequency bias could  
 1728 be present, or too weak to detect; but, under our inference  
 1729 pipeline, biases in frequency would only affect the variance  
 1730 of inferred  $s$ , not its expected value, as long as the bias across  
 1731 time points remains constant. We can see this by considering



1732 the deterministic (mean) dynamics of mutant frequencies  $f$   
1733 in a population with  $m$  genotypes,

$$f_i(t) = \frac{f_{0,i} e^{s_i t}}{\sum_j^m f_{0,j} e^{s_j t}}$$

1734 We could then include a strain-specific, constant multiplica-  
1735 tive bias parameter,  $\gamma_i$ . The observed frequencies would then  
1736 follow,

$$f_i(t) = \frac{\gamma_i f_{0,i} e^{s_i t}}{\sum_j^m \gamma_j f_{0,j} e^{s_j t}}$$

1737 By observing these biased frequencies instead of the actual  
1738 frequencies, we would infer  $s_i$  and  $\gamma_i f_{0,i}$ , therefore only bi-  
1739 asing the nuisance intercept parameter.

1740 As expected from the above analysis, there was no consis-  
1741 tent, detectable correlation between genomic position and in-  
1742 ferred fitness (Figure S6). However, there is one exception:  
1743 in a couple of the L experiments, it looks like there is a dip in  
1744 median fitness around  $\sim 2.7$  Mb, seemingly caused by a lack  
1745 of neutral/beneficial variants. This position is about  $\sim 1$  Mb  
1746 downstream from the origin of replication (3.8Mb), and  $\sim 1$   
1747 Mb upstream of the termination of replication and Dif site  
1748 ( $\sim 1.5$ Mb). So it appears to be unlikely an artifact of uneven  
1749 copy numbers or a DNA extraction bias. The origin of this  
1750 signal is unclear, but seems to indicate that there is a region  
1751 of the L genome that is more likely to have deleterious ef-  
1752 fects from knockout mutations. However, in any case, the  
1753 dip seems to be isolated to a seemingly unremarkable por-  
1754 tion of the genome, and thus does not call into question the  
1755 general validity and assumptions of our model.

## 1756 S4 Analysis

### 1757 S4.1 Similarity of fitness effects across environments.

1758 To compute the correlation of knockout fitness effects across  
1759 environments for a given genetic background (main text Fig-  
1760 ure 3), we first removed genes with noisy fitness effects  
1761 ( $\sigma_s > 1\%$ ), then calculated the weighted pearson correlation  
1762 coefficient, where genes are labeled  $k$  and environments are  
1763 labeled  $i, j$ ,

$$w_k = 1/(\text{var } \hat{s}_{i,k} + \text{var } \hat{s}_{j,k}) \quad (15)$$

$$\mu(x) = \frac{\sum_k w_k x_k}{\sum_k w_k} \quad (16)$$

$$\text{wcov}(x, y; w) = \frac{\sum_k w_k (x_k - \mu(x))(y_k - \mu(y))}{\sum_k w_k} \quad (17)$$

$$\rho_{i,j} = \frac{\text{wcov}(\hat{s}_i, \hat{s}_j; w)}{\sqrt{\text{wcov}(\hat{s}_i, \hat{s}_i; w) \text{wcov}(\hat{s}_j, \hat{s}_j; w)}} \quad (18)$$

1764 We then performed hierarchical clustering using Ward's  
1765 method across environments for each genetic background,  
1766 with  $1 - \rho_{i,j}$  as the distance metric. Environment pairs with  
1767  $\rho_{i,j} < 0$  are set to 0 for the purposes of clustering, as there  
1768 were few negative correlations, and all were small.

1769 We used a bootstrapping procedure to estimate the statistical  
1770 support for each cluster of environments. Using only the in-  
1771 tersection of genes that passed across all environments, we  
1772 performed standard resampling of genes with replacement,  
1773 and then repeated the correlation measurement of knockout  
1774 fitness values for each pair of environments. Then we re-  
1775 peated the hierarchical clustering and compared each branch-  
1776 ing of the original tree to the bootstrapped tree using the  
1777 method of (67). We repeated the resampling procedure 5000  
1778 times for each genetic background and reported the average  
1779 support for each clade.

1780 We performed a principal components analysis on our data,  
1781 using normalized fitness effects as the features. We only  
1782 included genes that had measured fitness effects across all ex-  
1783 periments. We normalized the fitness data separately for each  
1784 experiment so that the scale of fitness effects was comparable  
1785 across conditions. We first performed a quantile transform  
1786 (to a gaussian distribution) on the fitness effects using  
1787 `sklearn.preprocessing.quantile_transform`,  
1788 and then subsequently centered and scaled the data to turn  
1789 it into a standard normal. We performed the PCA with  
1790 `sklearn.decomposition.PCA`.

1791 **S4.2 Network of gene-by-gene correlations.** To investi-  
1792 gate potential relationships between genes in the different  
1793 strain investigated in our work, we sought to quantify the de-  
1794 gree of correlation of fitness measurements across all envi-  
1795 ronments between every pair of genes, a quantity that has pre-  
1796 viously been referred to as cofitness (41). Highly correlated  
1797 fitness measurements may indicate that genes are connected  
1798 via gene regulation. In order to account for the fact that the  
1799 measurement error in fitness measurements varies between  
1800 genes and environments, we computed the cofitness of every  
1801 pair of genes  $i, j$  as the weighted pearson correlation coeffi-  
1802 cient, where environments are labeled  $k$ , analogous to equa-  
1803 tions 15-18. We excluded genes that were not called as sig-  
1804 nificantly non-neutral in at least one experiment, and genes  
1805 with successful fitness measurements in  $< 4$  experiments.

1806 The vast majority of non-zero correlations are likely gener-  
1807 ated by chance, due to the relatively small number of envi-  
1808 ronments where fitness is measured. Therefore, for each pair  
1809 of genes, we generated a null cofitness distribution through  
1810 a resampling procedure performed 300 times, by (1) ran-  
1811 domly permuting the fitness assignments for both genes, (2)  
1812 resampling each fitness value such that  $\hat{s}_{boot} \sim \mathcal{N}(\hat{s}, \text{std } \hat{s})$   
1813 ("parametric bootstrapping"), and (3) recalculating cofitness  
1814 via equations 15-18. We then compared the measured cofit-  
1815 ness to the null distribution to generate a 1-sided p-value. Af-  
1816 ter correcting the set of p-values with a Benjamini-Hochberg  
1817 FDR correction, we considered gene pairs to be significantly  
1818 correlated at  $\alpha = 0.05$ , effectively drawing an edge between  
1819 the two genes in the cofitness network.

1820 After identifying statistically significant correlations between  
1821 genes across environments, we sought to cluster genes into  
1822 communities, without considering the magnitude or sign of  
1823 the cofitness values. We used the 'Fluid Communities' algo-  
1824 rithm (55), as implemented in the `networkx` python pack-  
1825 age (68), because of the flexibility of the algorithm, and

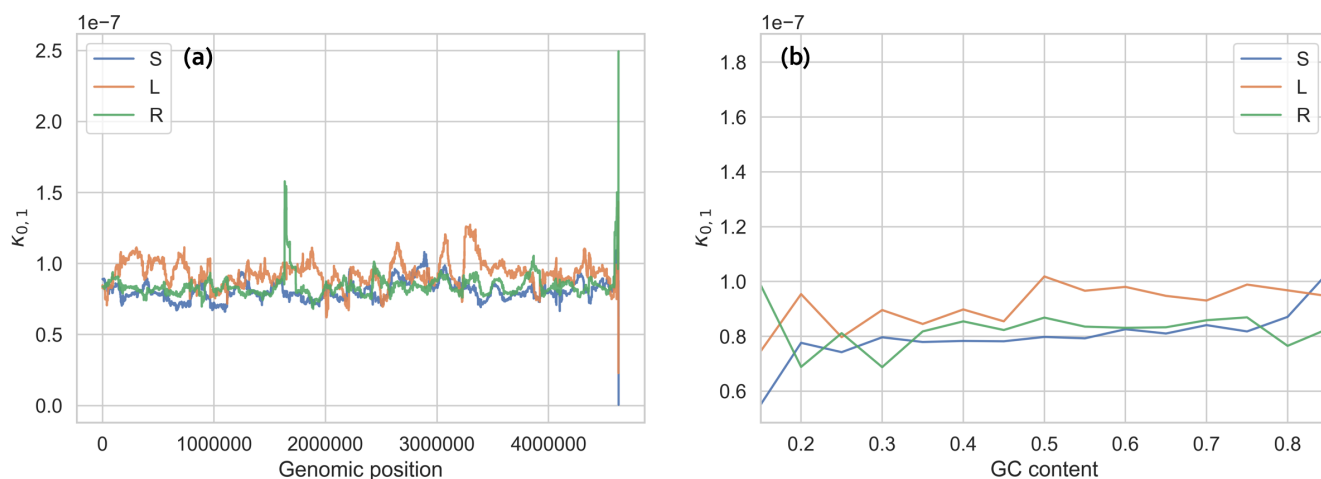

**Fig. S4.** The measured noise parameter  $\kappa_{j,k}$  does not vary systematically over (a) genomic position, or (b) barcode GC content, indicating that these factors do not measurably bias barcode frequency measurements. Data is from S/L/REL606 monoculture (1) experiments, replicate 1.

1826 the resulting communities had the highest modularity of all  
 1827 community-finding algorithms we explored. As the fluid  
 1828 communities algorithm is initialized stochastically, and re-  
 1829 quires pre-specifying  $k$  communities, we ran the algorithm  
 1830 on our data across varying community sizes,  $k \in [4, 20]$ , with  
 1831 200 replicates for each  $k$  (Figure S17). We then picked the  
 1832 communities with the highest modularity for each genetic  
 1833 background. For the purposes of community finding, we  
 1834 treated all significant edges as the same, without consider-  
 1835 ing the actual cofitness value of the edge. All community  
 1836 sets found had *modularity*  $> 0$ , indicating that genes were  
 1837 more tightly connected within their community compared to  
 1838 between communities.

1839 Standard gene ontology enrichment analysis was performed  
 1840 on each community in each genetic background with the  
 1841 `goatools` python package (69), using Fisher's exact test to  
 1842 find significantly over-represented annotations in a gene set,  
 1843 with an FDR correction and  $\alpha = 0.05$ .

1844 We sought to check if variance in fitness across environments  
 1845 for any given knockout could predict if two genes would stay  
 1846 in the same cluster across genetic backgrounds, as a control  
 1847 for the observed correlation with EcoliNet score. We average  
 1848 fitness variance across environments over the two knockouts  
 1849 of interest, referring to the quantity as  $\langle \text{var}(s) \rangle$ . We fit a log-  
 1850 stic model with normalized EcoliNet score of the gene pair,  
 1851  $n\text{score} \equiv \text{score}/\text{stdscore}$  and  $n\text{var} \equiv \langle \text{var}(s) \rangle / \text{std} \langle \text{var}(s) \rangle$   
 1852 as the predictors (standard deviation is taken over all knock-  
 1853 out pairs), and the probability that the two genes are together  
 1854 in strain 2, if they were together in strain 1 as the response  
 1855 variable,  $\log p_i / (1 - p_i) = n\text{score} \beta_{\text{score}} + n\text{var} \beta_{\text{var}} + \beta_0 +$   
 1856  $\epsilon_i$ . The results are shown in Figure S24.

1857 It is known that community detection algorithms can have  
 1858 potential surfaces with large plateaus without a clear max-  
 1859 imum, i.e. can give many solutions with similar modularity  
 1860 but different groupings (70). We wanted to see if the observed  
 1861 (mostly) "random reassortment" of genes among clusters be-  
 1862 tween genetic backgrounds could be explained by this effect.  
 1863 Thus, we compared the optimal partition of each background

1864 to the 100 next-best partitions across all backgrounds (Figure  
 1865 S18). For each suboptimal partition, we asked if two genes  
 1866 were in the same cluster in the optimal partition, what is the  
 1867 probability that they are also in the same cluster in the sub-  
 1868 optimal partition. We see that if we compare partitions in  
 1869 the same genetic background, this probability is around 40%,  
 1870 while it is around 10% when comparing partitions across  
 1871 background. This suggests that different reasonable parti-  
 1872 tions of the cofitness networks are much more similar within  
 1873 genetic backgrounds than between backgrounds. We also  
 1874 re-ordered the genes of the cofitness network such that they  
 1875 followed the ordering of another genetic background's opti-  
 1876 mal partition (Figure 4B). It is apparent that replotting the  
 1877 cofitness matrix using another genetic background's cluster-  
 1878 ing does not produce noticeable structure. Together, these  
 1879 results suggest that while different reasonable partitions can  
 1880 give slightly different clusters, the observed reassortment of  
 1881 knockout fitness correlations among backgrounds cannot just  
 1882 be explained by failures of the community detection algo-  
 1883 rithm. We also investigated the extent to which the structure  
 1884 of our cofitness networks was driven by measurement noise  
 1885 (Figure S19, S20). We leveraged the fact that we had at least  
 1886 two biological replicates per experiment, and computed new  
 1887 cofitness networks (in the same manner as described above),  
 1888 only using either biological replicate "1" or "2". We can see  
 1889 that even when the data is independently split, the cofitness  
 1890 networks within a genetic background are more similar than  
 1891 between backgrounds.

**S4.3 Genome evolution.** We sought to understand if  
 1892 knockout fitness measurements could predict the probability  
 1893 that a gene would mutate in the LTEE. To that end, we down-  
 1894 loaded clonal sequencing data from Tenaillon et al. (2016)  
 1895 (59), where the authors isolated and sequenced clones from  
 1896 a number of time points across all 12 lines of the LTEE, and  
 1897 identified mutations relative to the REL606 ancestor. We ex-  
 1898 cluded synonymous SNPs from our analysis. A representa-  
 1899 tion of the raw data can be found in Figure S28.

We then sought to understand if knockout fitness effects can

1902 predict if a mutation will appear in a gene in the Tenailon  
1903 et al. dataset, as a proxy for establishment. For REL606,  
1904 classified a gene as mutated if a mutation appeared in one of  
1905 the 12 LTEE lines (excluding mutator populations). For S and  
1906 L, we classified genes as mutated only if they were present  
1907 in the appropriate sublineage, i.e. in REL11830, REL11036  
1908 or REL11831, REL11035 for S and L respectively. We also  
1909 excluded mutations that were already present in our S and  
1910 L clones, which we determined from clonal sequencing data  
1911 from Plucain et al. (2014) (46). We then fit a logistic model  
1912 with knockout fitness effect as the predictor variable and gene  
1913 mutated status (between time points) as the response variable,

$$\log p_{est,i}/(1-p_{est,i}) = \pm \tilde{s}_i \beta_{est\pm} + \beta_0 + \epsilon_i$$

1914 We fit two different coefficients for beneficial and deleteri-  
1915 ous mutations in each environment,  $\beta_{est+}$  and  $\beta_{est-}$  respec-  
1916 tively. We only include genes that are putatively neutral, i.e.  
1917  $|s| < 0.005$  and not called as significantly non-neutral, along  
1918 with genes that are either significantly beneficial or deleteri-  
1919 ous, all at significance level  $\alpha = 0.05$ . We normalized the  
1920 fitness values by the median value of the non-neutral genes,  
1921 i.e.

$$\tilde{s}_i = \frac{s_i}{\text{med}_{i \notin \text{neutral}} s_i} \quad (19)$$

1922 We use the logistic model implementation in the  
1923 `statsmodels` python package (71). We used the  
1924 standard method of Benjamini & Hochberg to control for  
1925 the false discovery rate, pooling all tests across beneficial  
1926 and deleterious coefficients. To test if there is a significant  
1927 difference between REL606 logit slopes at 0-5k and 5-20k,  
1928 we employed a permutation test. To construct a null distri-  
1929 bution of the difference in slopes, for each gene we shuffled  
1930 whether it 'established' (0 or 1) between 0-5k and 5-20k and  
1931 recomputed the regression coefficients 1000 times, recording  
1932 the difference. We then compared the actual difference in  
1933 coefficients to the null distribution to get p-values.

1934 **S4.4 Changes in gene expression.** We used a microar-  
1935 ray gene expression dataset previously reported by Le Gac et  
1936 al. (2012) (16) to compare to our knockout fitness measure-  
1937 ments, downloaded from the NCBI Gene Expression Omnibus  
1938 (72), importing data with GEOquery (73). We pri-  
1939 marily used the GEO2R tool to process the raw microarray  
1940 data along with the R package `limma` (74, 75). After ap-  
1941 plying a  $\log_2$  transform to the data, we ensured that all col-  
1942 lected samples had approximately the same intensity distri-  
1943 butions by performing a quantile normalization. Then, pool-  
1944 ing all replicates within a strain, we fit a linear model to our  
1945 data to determine the relative log-fold change in expression  
1946 between different strains, taking into account the measured  
1947 mean-variance relationship. A representation of the raw data  
1948 can be found in Figure S27. We also compared the distri-  
1949 bution of log-fold fitness effects between neutral and non-  
1950 neutral genes (Figure 5B). We computed p-values to compare  
1951 the distributions with standard Mann-Whitney U tests.

We then fit a linear model to investigate if there was a corre-  
1952 lation between fitness measured in a given environment,  $s_i$ ,  
1953 and log-change in gene expression between evolutionary time  
1954 points  $\Delta E_i$ , such that  
1955

$$\Delta E_i = \pm \tilde{s}_i \beta_{exp\pm} + \beta_0 + \epsilon_i$$

1956 Similar to the gene establishment model, we fit two different  
1957 coefficients for beneficial and deleterious mutations in each  
1958 environment,  $\beta_{exp+}$  and  $\beta_{exp-}$  respectively (Figure S29).  
1959 We only include genes that are putatively neutral, i.e.  $|s| <$   
1960  $0.005$  and not called as significantly non-neutral, along with  
1961 genes that are either significantly beneficial or deleterious,  
1962 all at significance level  $\alpha = 0.05$ . We normalized the fitness  
1963 values by the median value of the non-neutral genes, in the  
1964 same manner as equation 19. We fit the model with weighted  
1965 least squares, as implemented in the `statsmodels` python  
1966 package (71), with weights  $w_i \propto 1/\text{var} \Delta E_i$ , to incorporate  
1967 the fact that there are different levels of measurement error  
1968 in the log-fold change expression for each gene. We used  
1969 the standard method of Benjamini & Hochberg to control for  
1970 the false discovery rate, pooling all tests across beneficial and  
1971 deleterious coefficients.

1972 As a control, we also investigated if our results would change  
1973 if we excluded poorly expressed genes. It is perhaps the  
1974 case that neutral knockouts are potentially a bad comparison  
1975 class, because many of them may be poorly expressed at all  
1976 times, and thus ineligible to undergo large changes in expres-  
1977 sion. We can test for this alternative hypothesis by focusing  
1978 our analysis on solely initially highly expressed (50th per-  
1979 centile) genes, excluding poorly expressed genes. The results  
1980 are shown in figure S30. The regression coefficients change  
1981 somewhat, but not qualitatively, showing that the aforemen-  
1982 tioned hypothesis is not likely the driver of the signals we  
1983 observed.



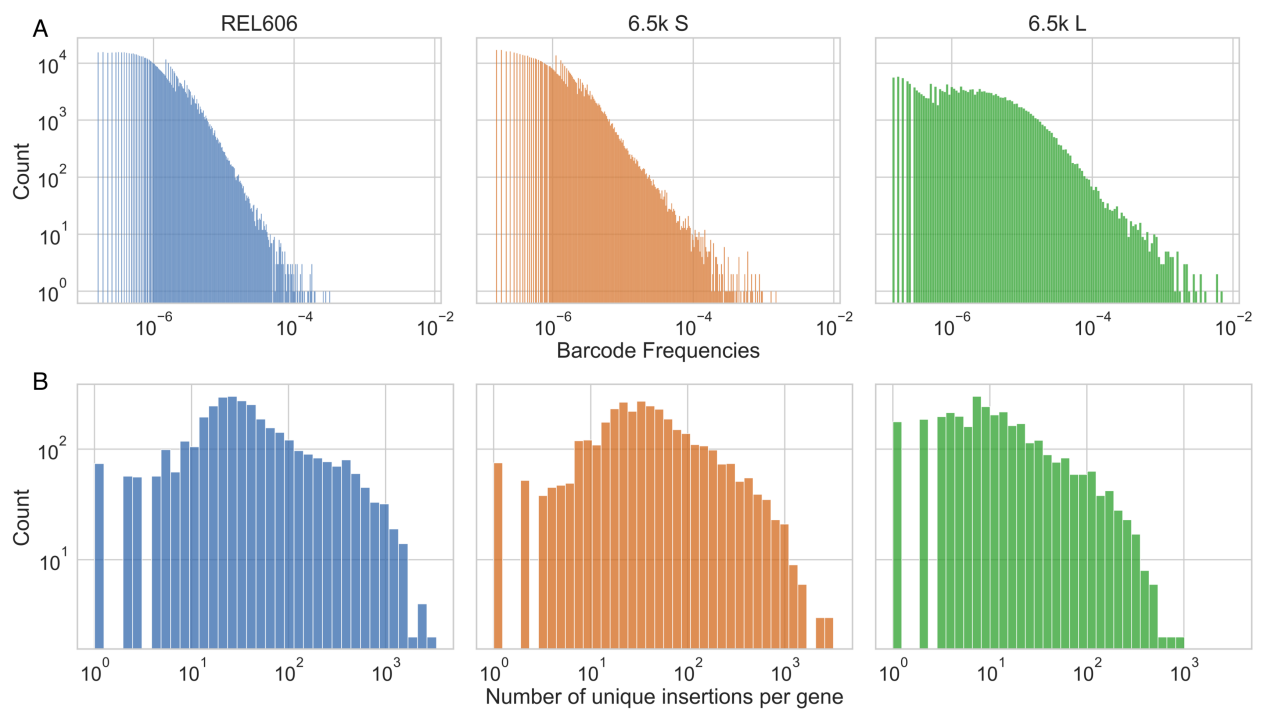

**Fig. S5.** Statistics of RB-TnSeq libraries, (A) initial distribution of barcode frequencies in library populations, and (B) distribution of number of unique barcoded transposon insertions into each gene (cds).

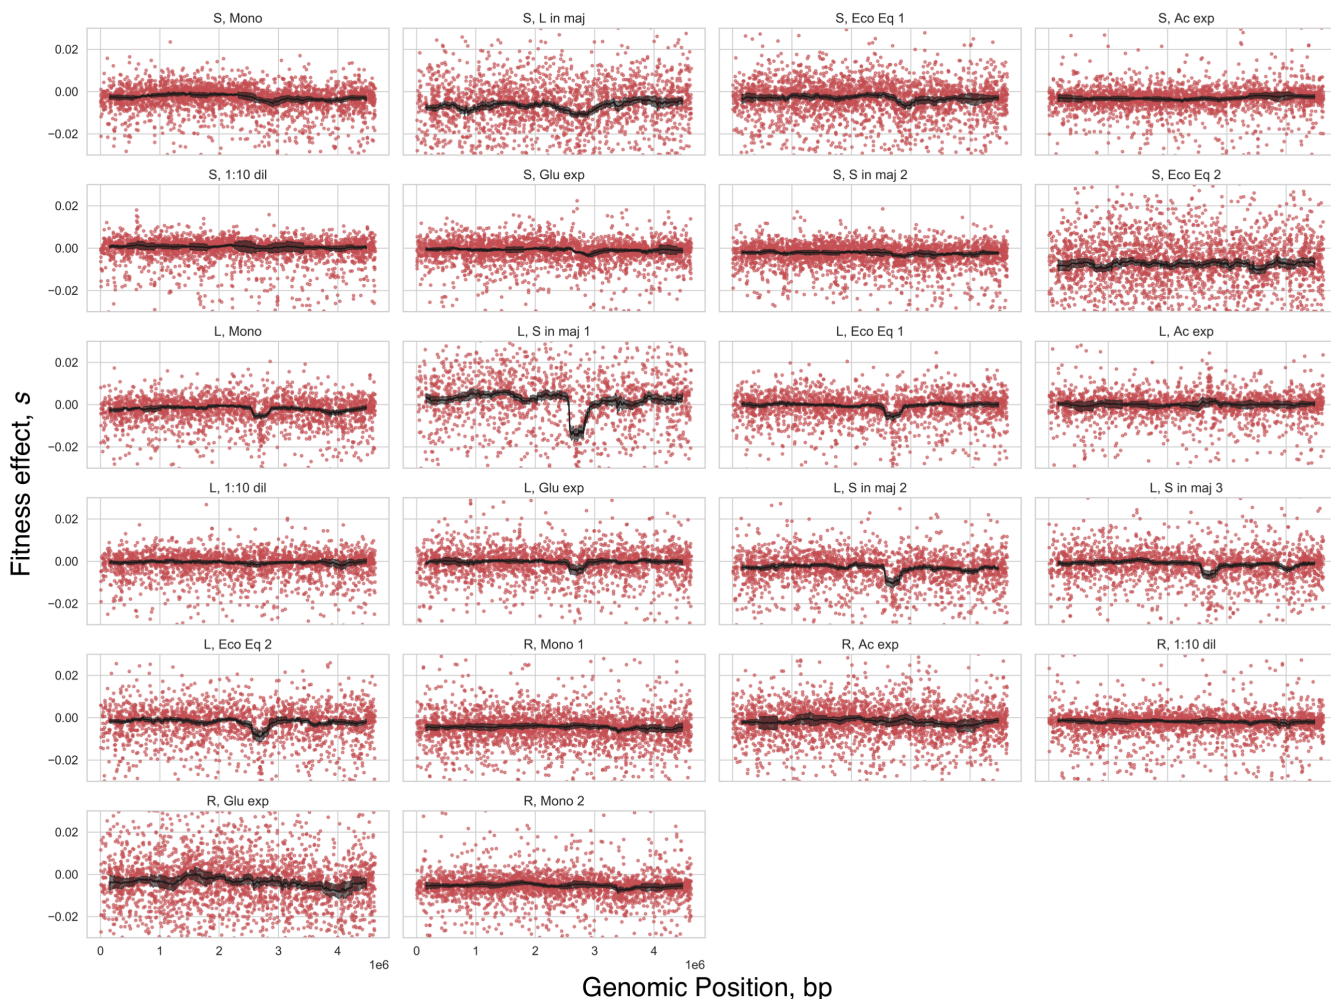

**Fig. S6.** Relationship between genomic position and fitness effect. Red dots are the fitness effects of individual knockouts, black line is the rolling median fitness effect (error bars are standard errors).

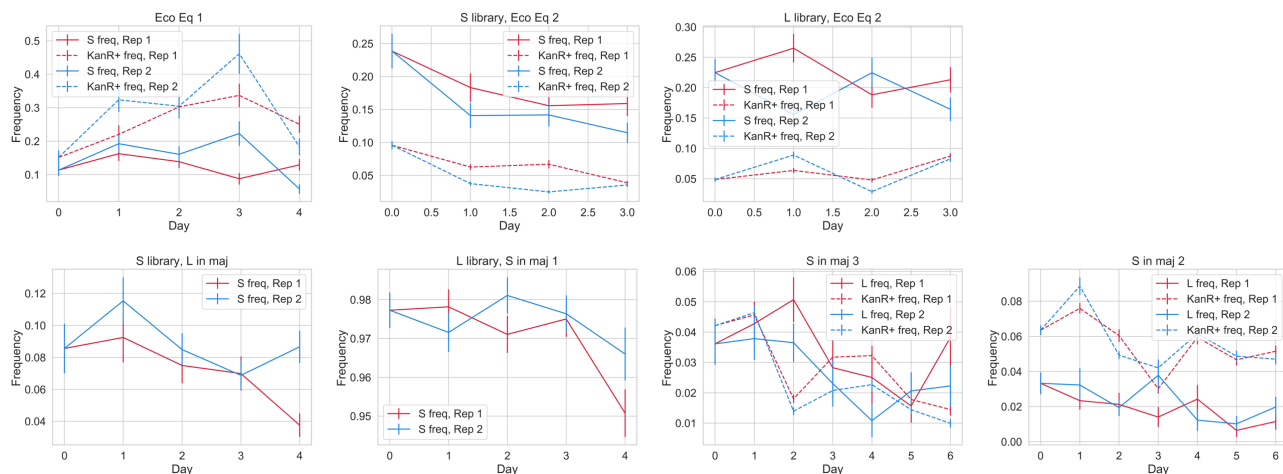

**Fig. S7.** Frequency trajectories of mixed culture experiments from CFUs. For each coculture experiment, we diluted and plated cultures on both TM plates (S/L indicator plates) and LB/Kan plates (pulls out cells from the RB-TnSeq libraries). We didn't plate experiments "S/L in maj (1)" on LB/Kan plates because we only cocultured wt S/L with L/S RB-TnSeq libraries respectively. Please note that each subplot is on a different scale.

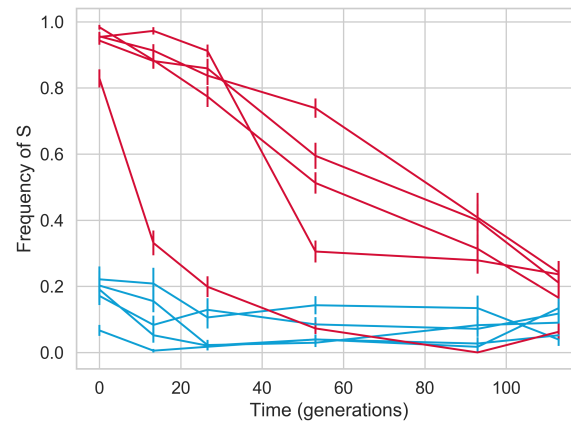

**Fig. S8.** Measured S/L frequency dependent fitness and ecological equilibrium via CFUs on TM plates (S/L indicator plates). Independent cocultures of S and L wt clones were propagated in standard LTEE conditions. Red lines indicate cultures that were started at high frequencies of S, blue lines indicate cultures started at low frequencies. Error bars represent standard errors.



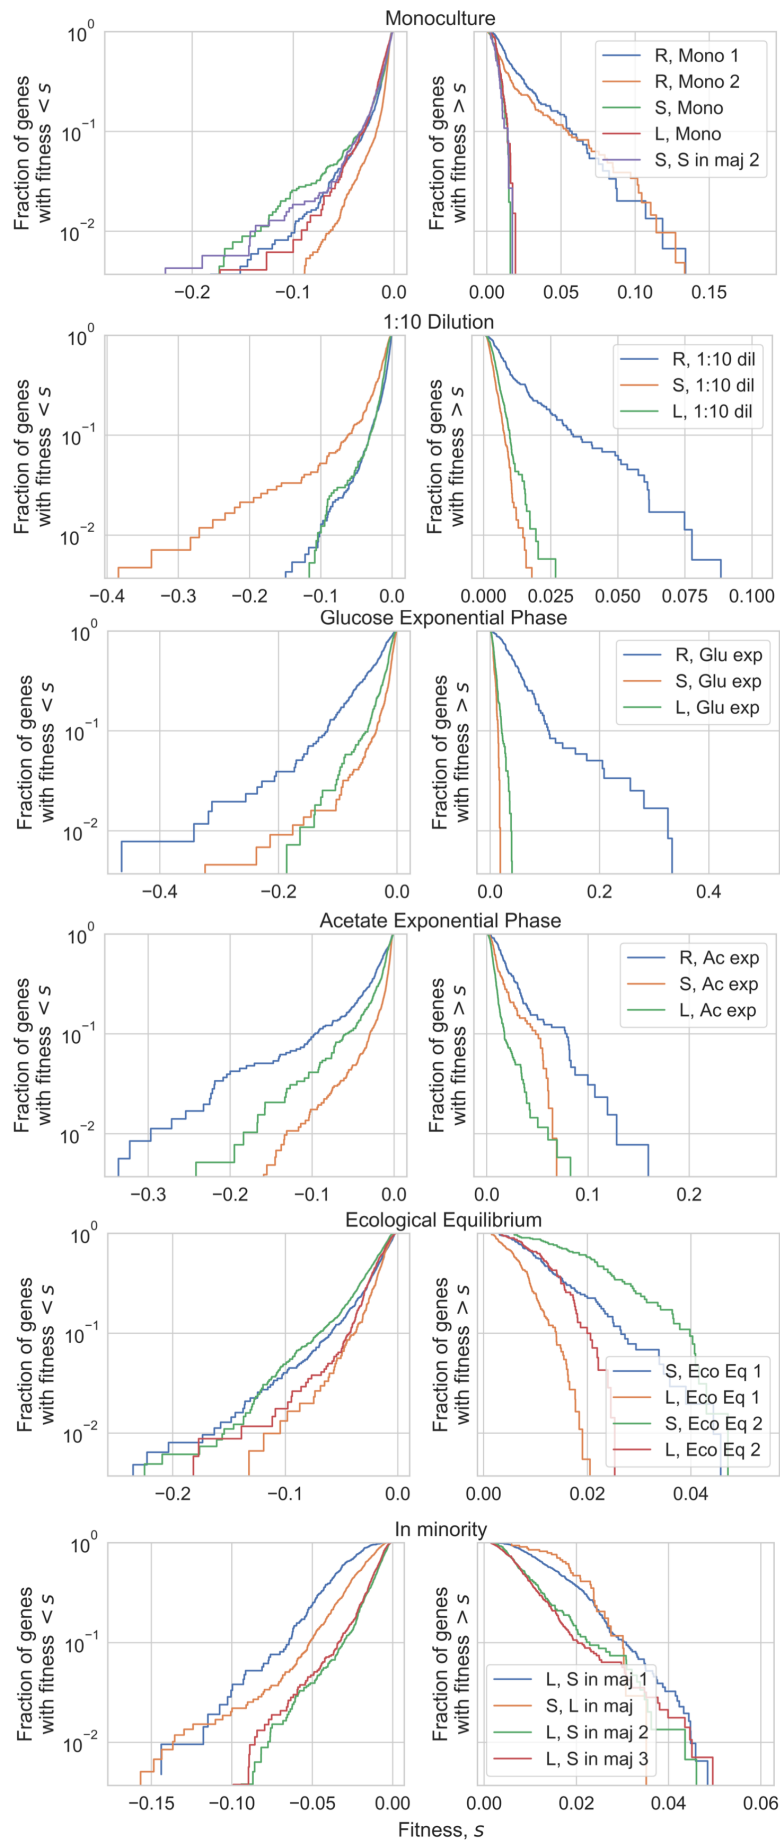

**Fig. S9.** All measured DFEs across experiments, arranged by environment.

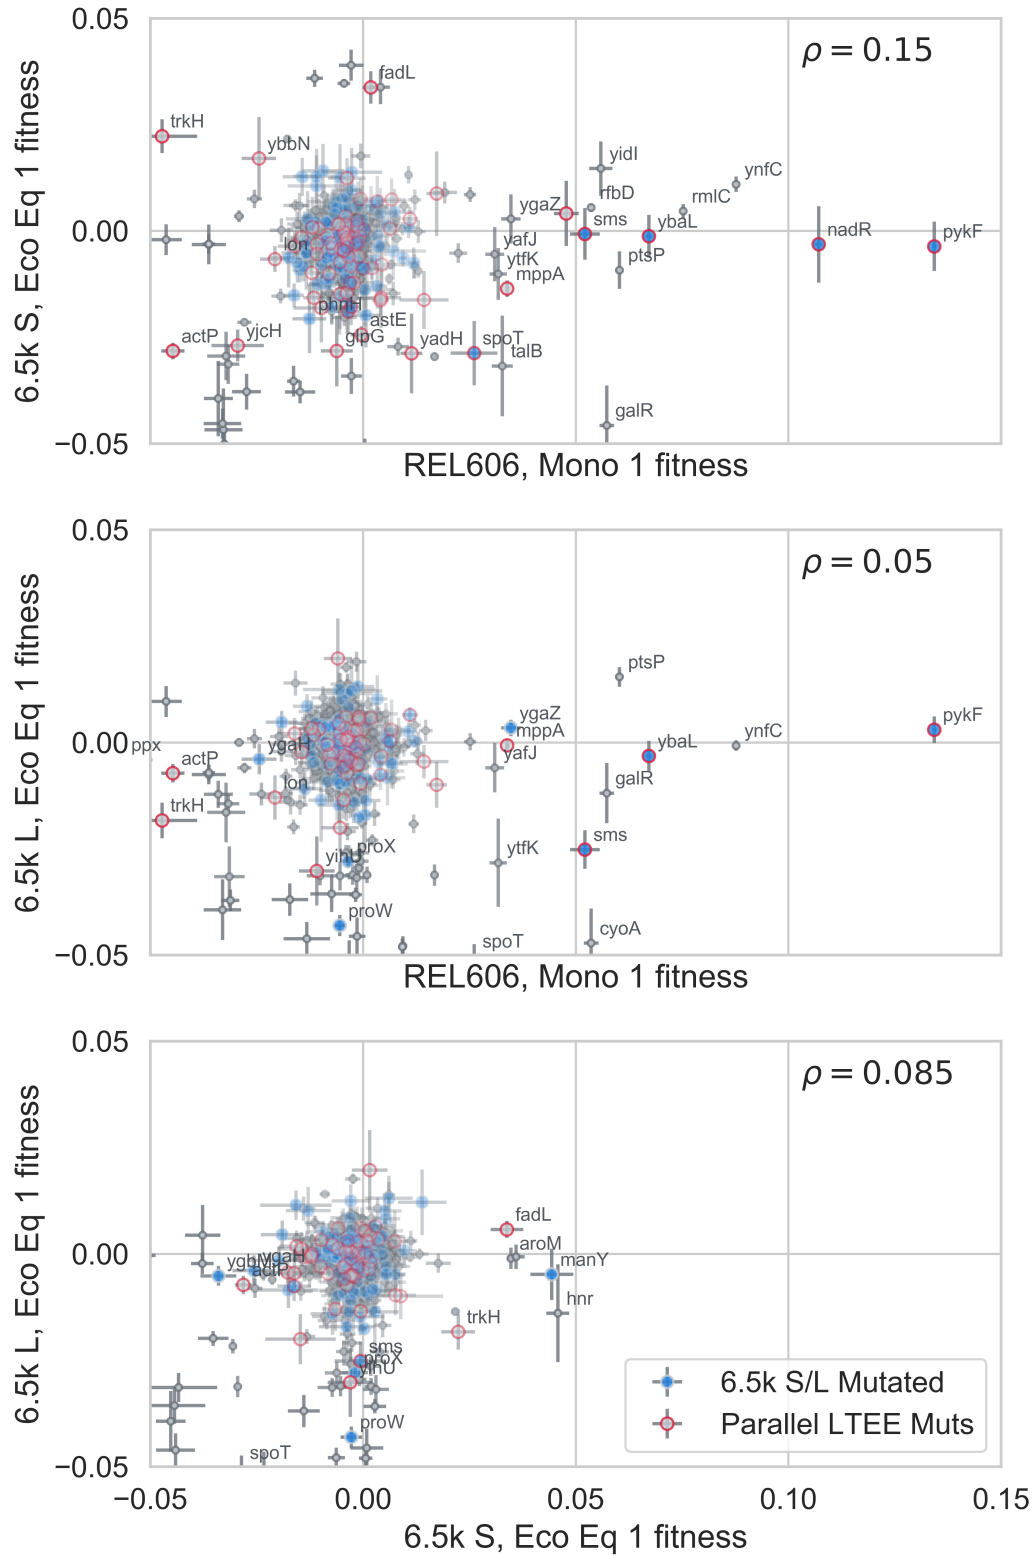

**Fig. S10.** Comparison of fitness effects; identical to Figure 1F in the main text, except we highlighted all genes in mutated operons. It is still the case that there are many genes that did not get a mutation in their operon, but still changed from a beneficial to non-beneficial fitness effect across genetic backgrounds.

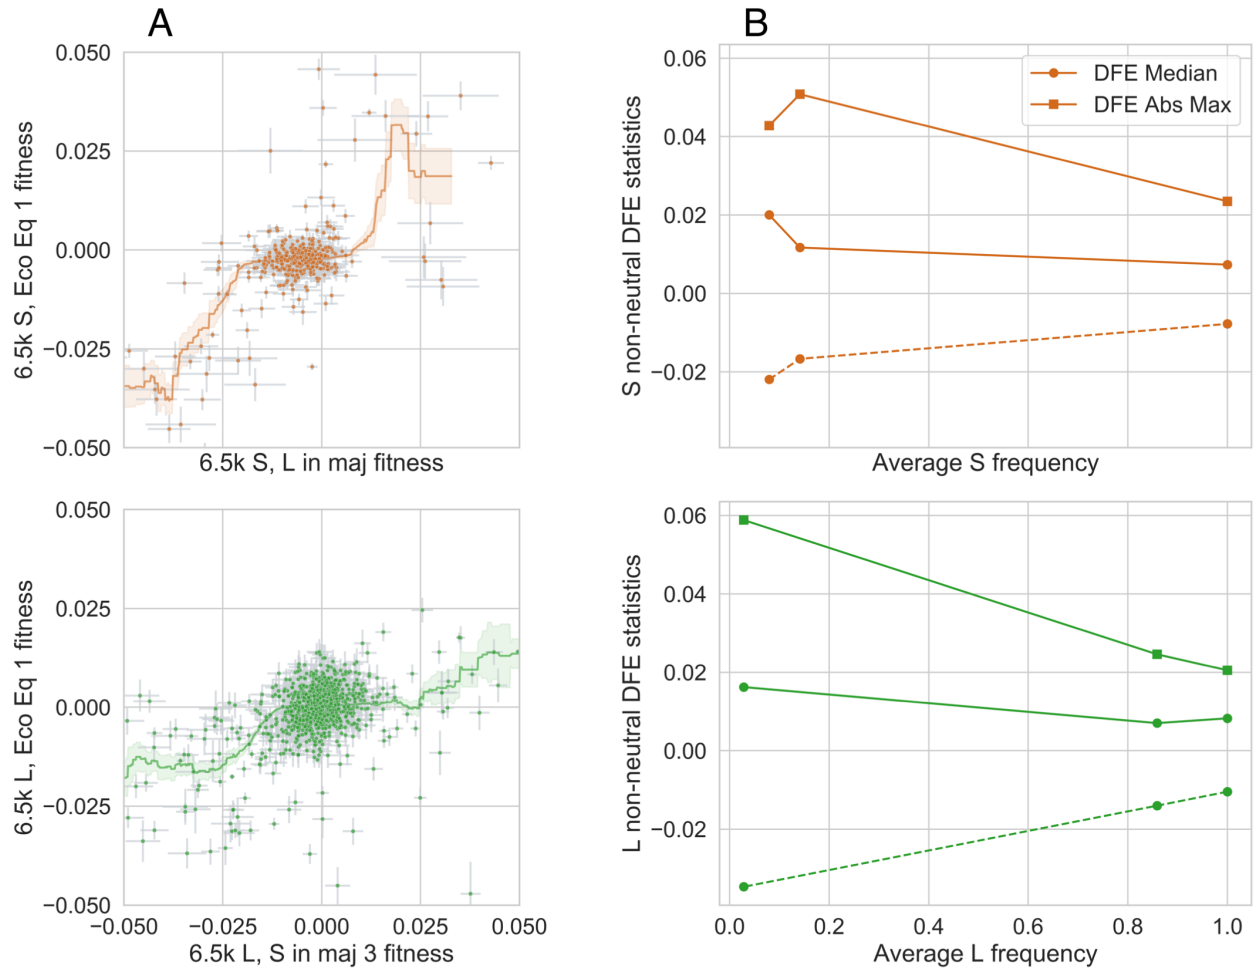

**Fig. S11.** Frequency-dependent knockout fitness effects for both 6.5k S and L. **(A)** Similar to Fig 2A in main text, except comparing fitness at ecological equilibrium to fitness when the ecotype is in the minority. **(B)** Changes in summary statistics of the DFE as a function of ecotype frequency. Solid lines represent the beneficial side of the DFE, while dashed lines represent the deleterious side.



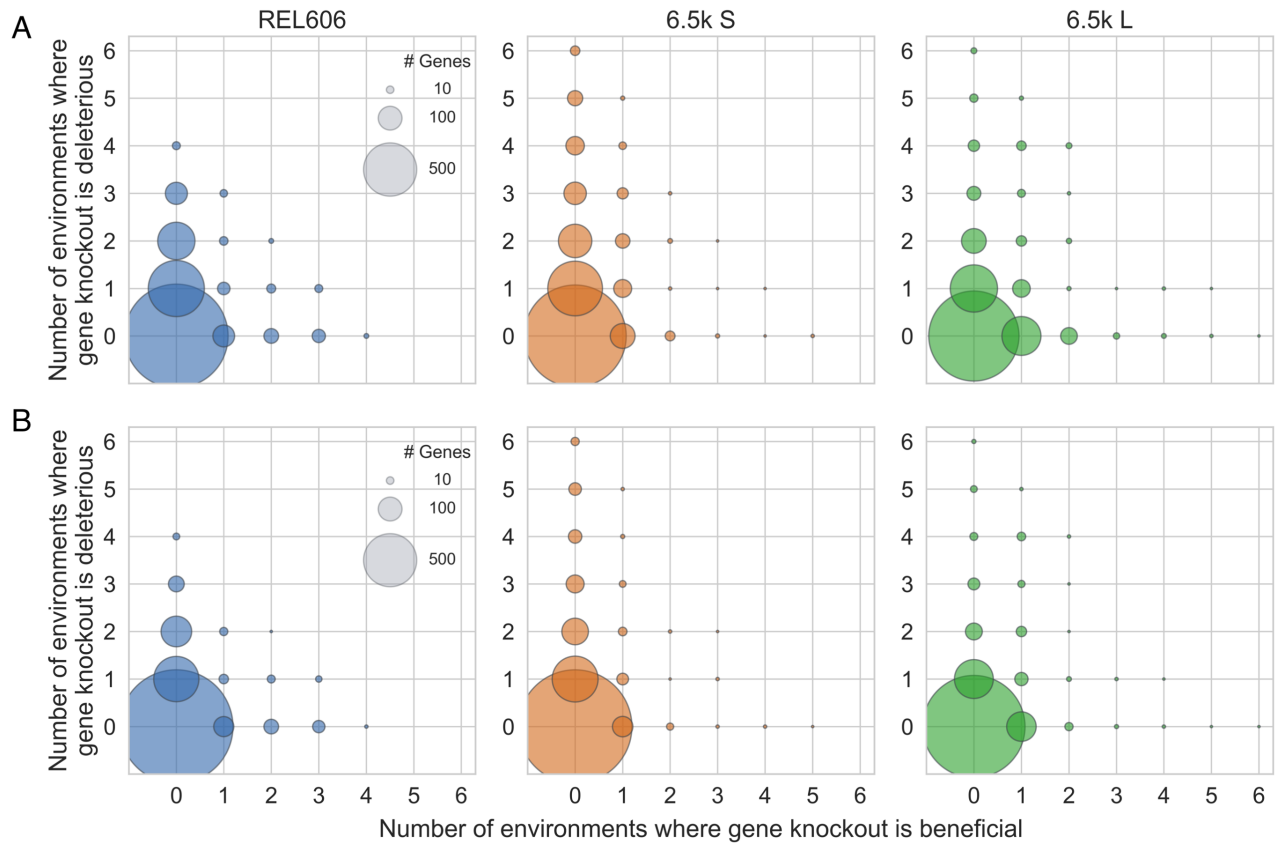

**Fig. S12.** Fitness effect sign-flipping across environments. Same as Figure 2C (main text), but (post-FDR correction) p-value cutoff is reduced from 0.05 to (A)  $10^{-3}$  or (B)  $10^{-5}$

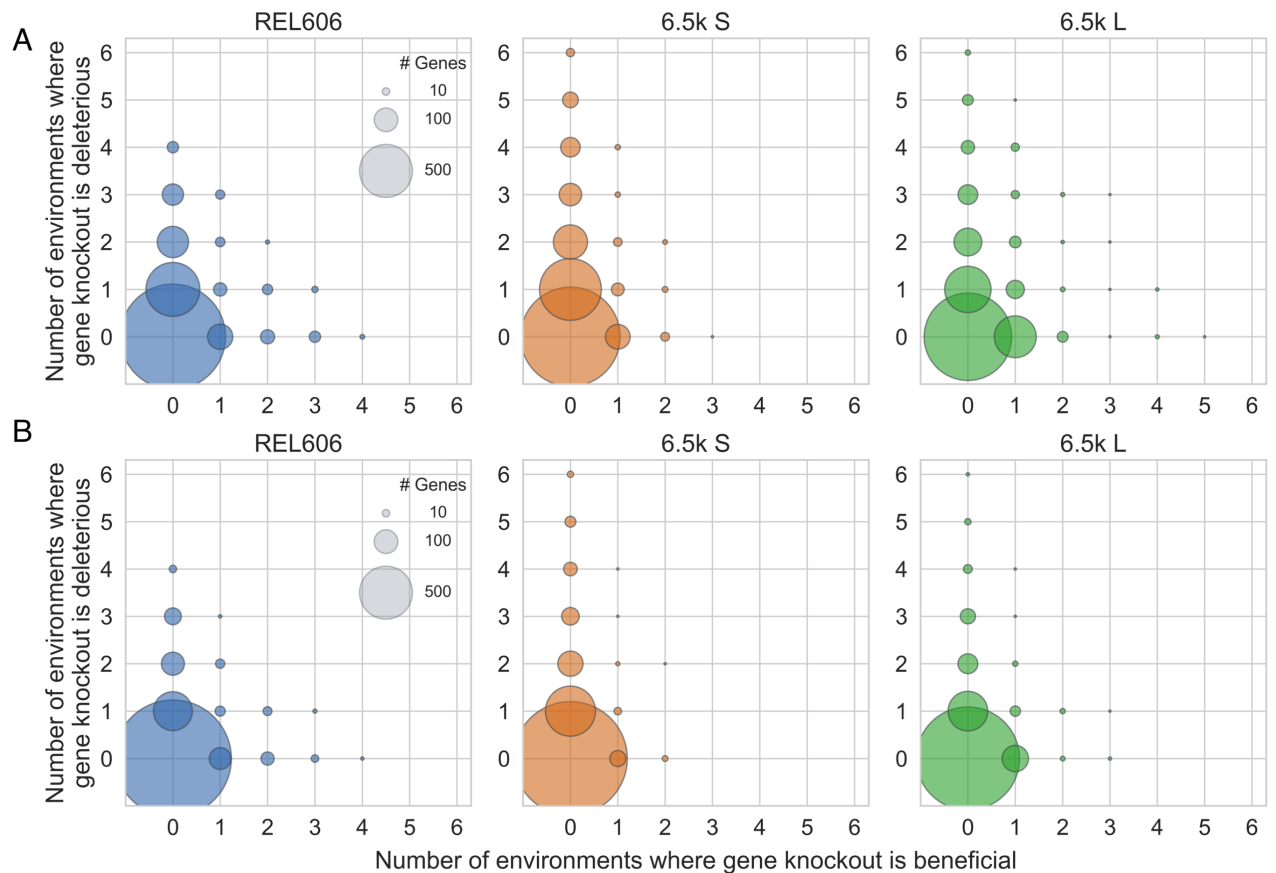

**Fig. S13.** Fitness effect sign-flipping across environments. Same as Figure 2C (main text), but we only consider genes non-neutral with fitness (A)  $|s| > 1\%$  or (B)  $|s| > 2\%$

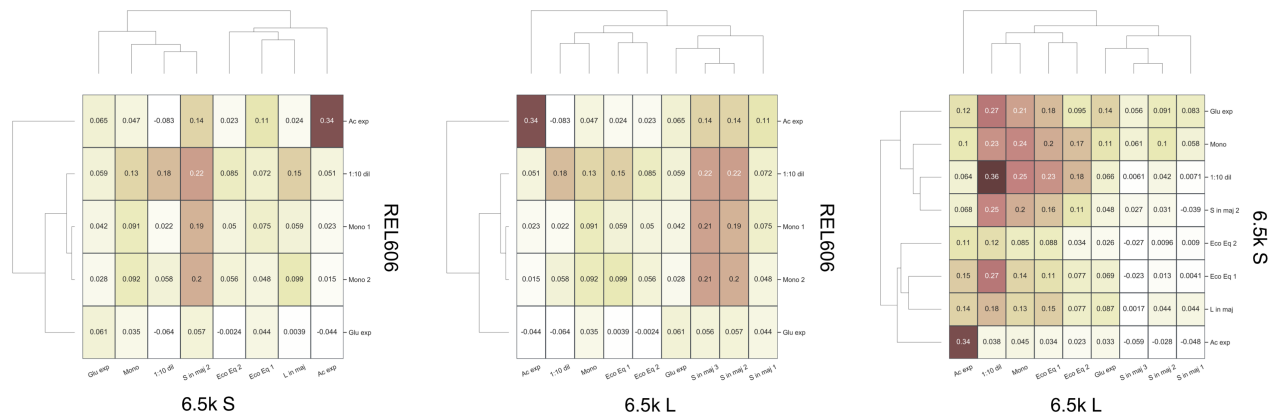

Fig. S14. Fitness effect correlations between strains.

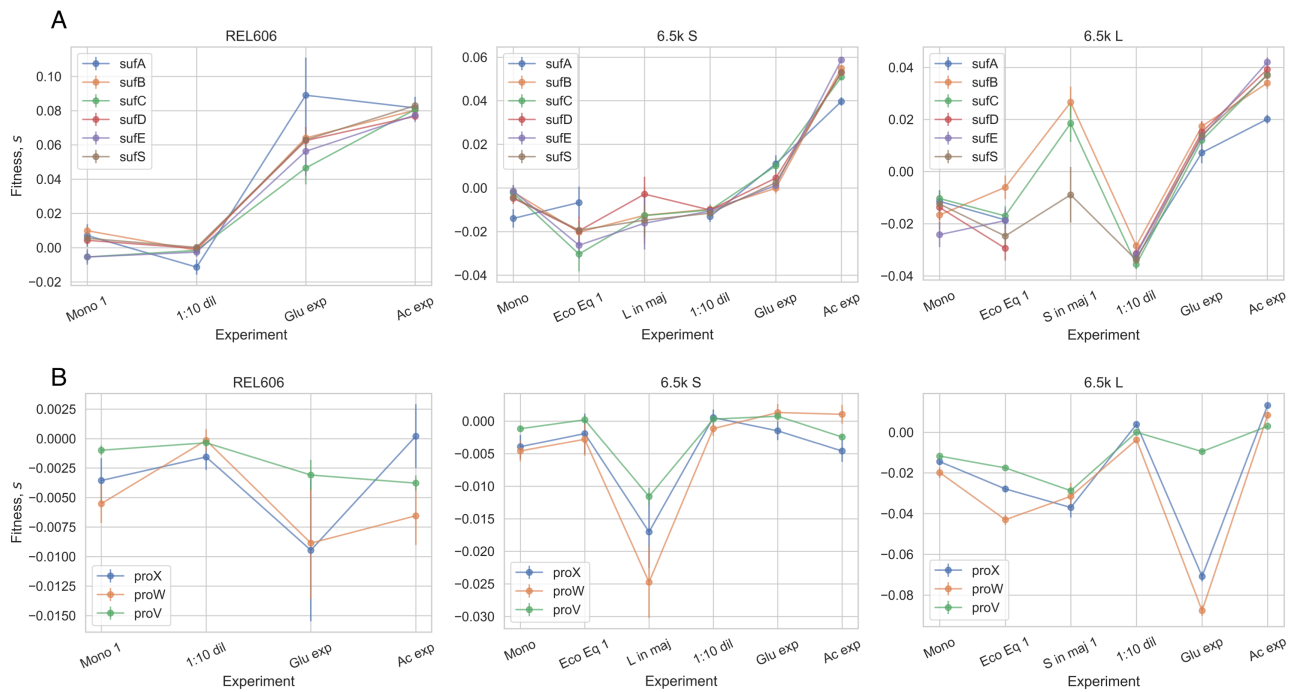

Fig. S15. Fitness effects of (A) *sufABCDE* and (B) *proVWX* operons in REL606 and 6.5k L/S.

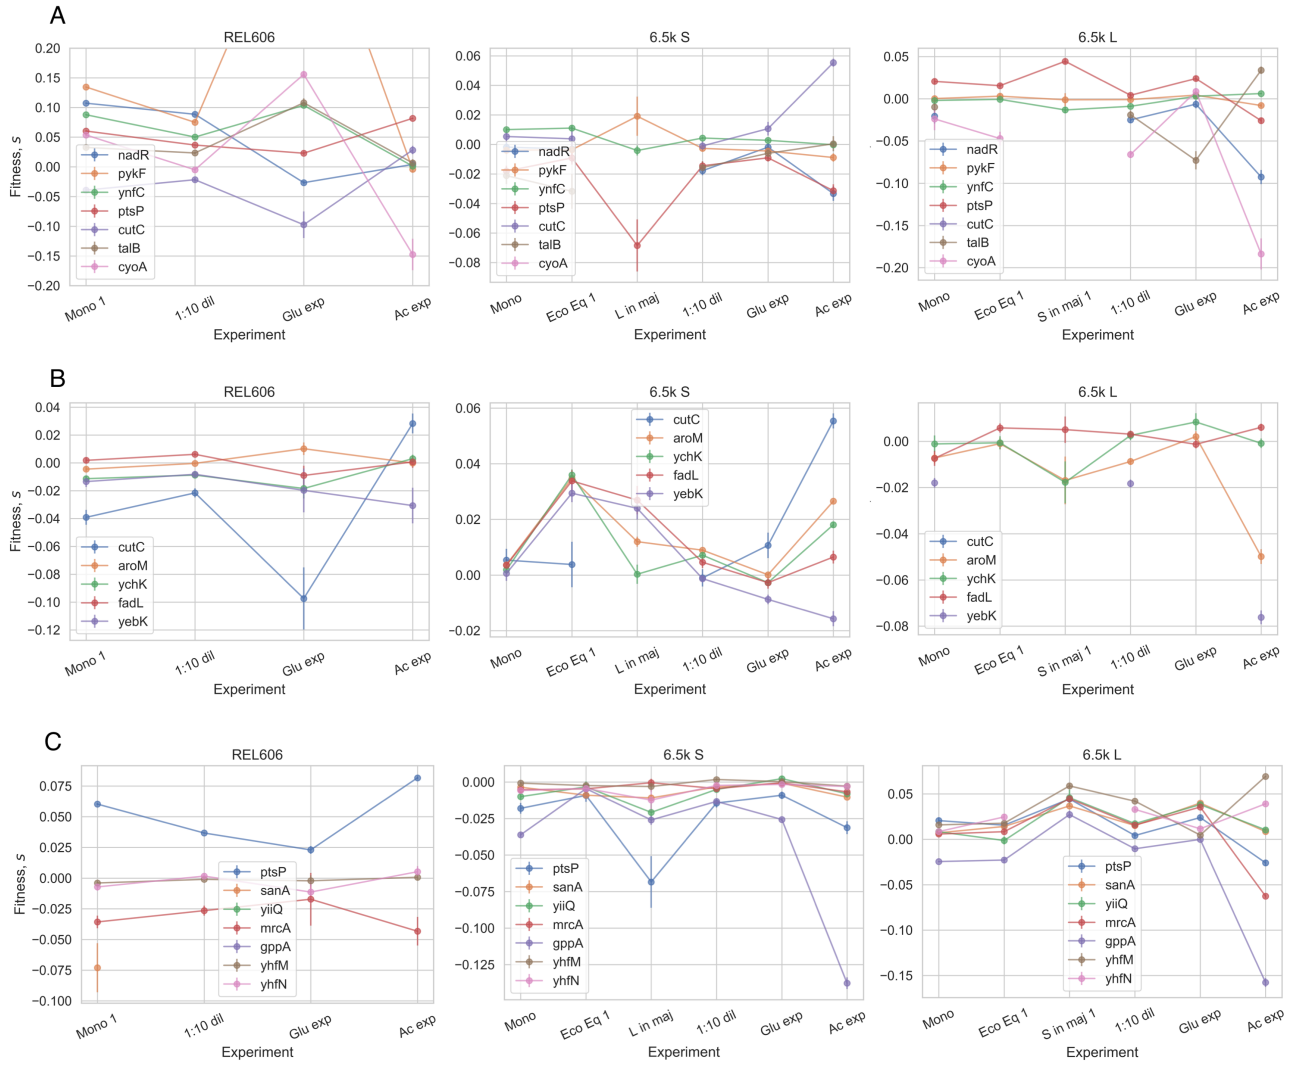

**Fig. S16.** Fitness effects of knockouts across environments, where knockouts are beneficial in at least one condition on the (A) REL606, (B) 6.5k S, (C) 6.5k L background.

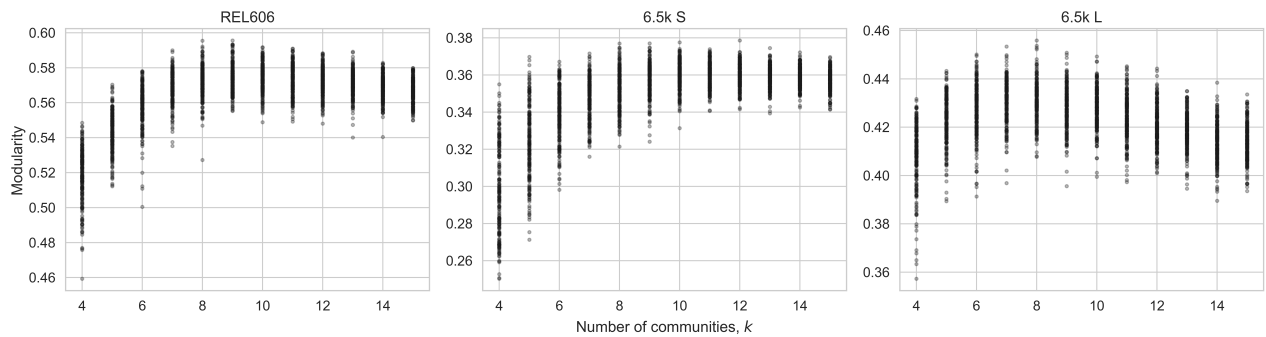

**Fig. S17.** Modularity of cofitness clusters, across 200 (stochastic) initializations for different numbers of communities from 4 – 15.





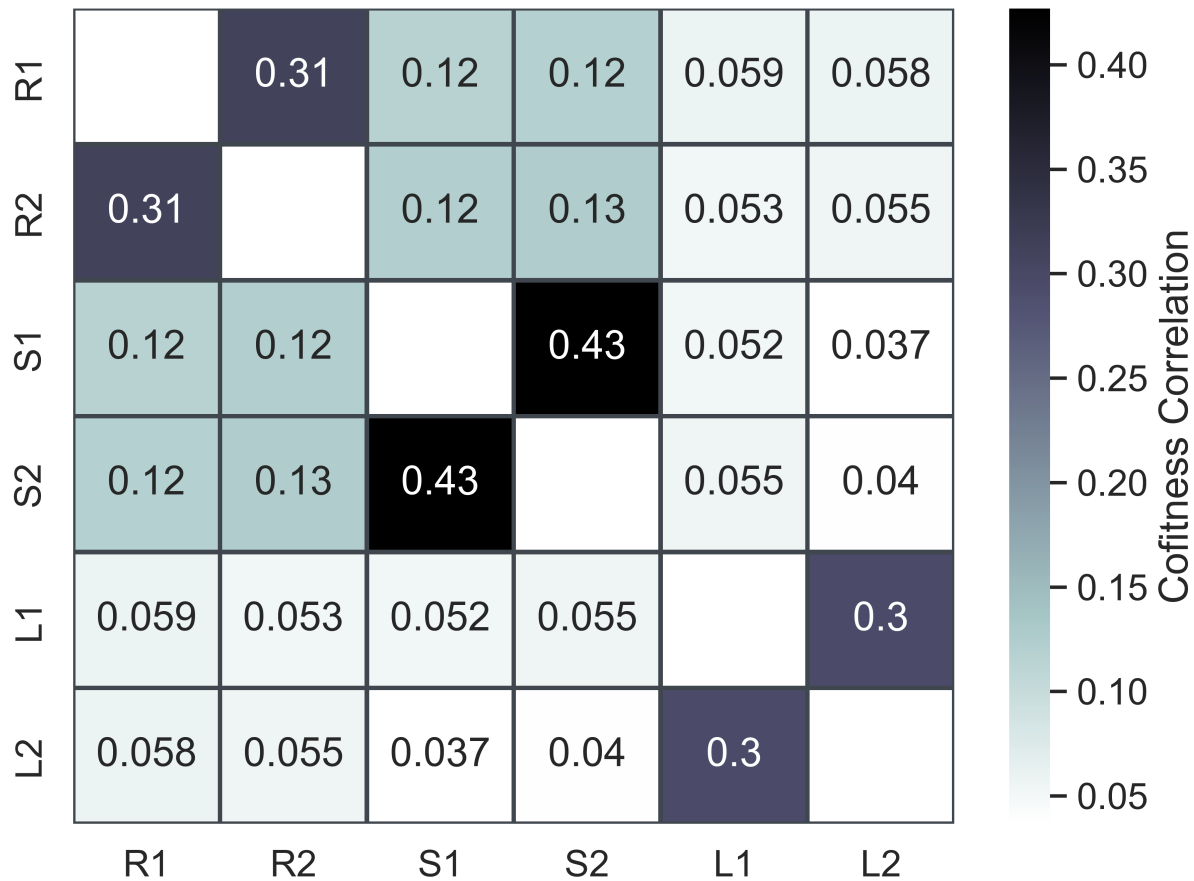

**Fig. S19.** In order to better understand the extent to which the structure of our cofitness networks is driven by measurement noise, we re-computed the cofitness networks, only using one of the biological replicates per experiment for every experiment. We then computed the correlation of all cofitness values across all networks. We can see that even when the data is independently split, the cofitness networks within a genetic background are more similar than between backgrounds. In the figure, R, S and L refer to REL606, 6.5k S/L libraries, respectively, and 1 and 2 refer to using only biological replicates "1" and "2" from each experiment.



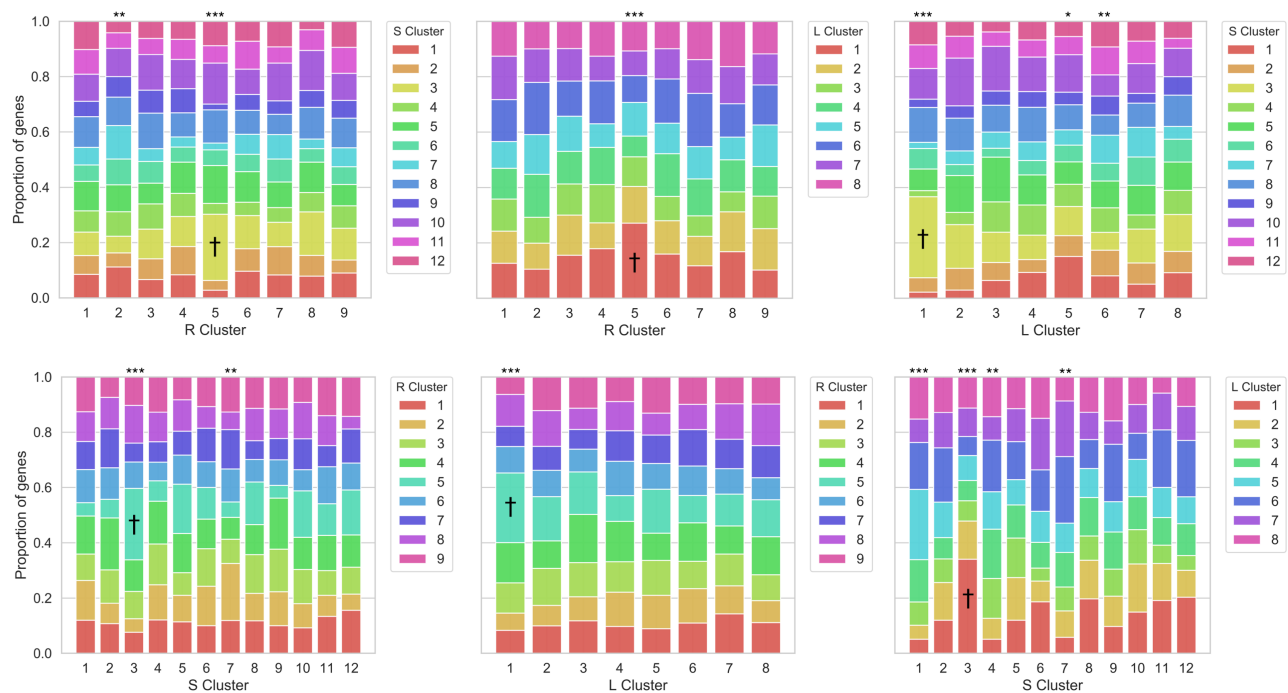

**Fig. S21.** In order to explore how clusters of genes changed across genetic background, we calculated the fraction of genes in a given cluster that belong to a cluster in a different genetic background. We see that clusters are mostly not preserved between genetic backgrounds, with the exception of the clusters marked by asterisks, which show non-random sampling across genetic backgrounds (\*  $p < 0.05$ , \*\*  $p < 0.005$ , \*\*\*  $p < 10^{-4}$ ; Pearson's chi-squared test). † set of clusters across all three genetic backgrounds which share more genes than expected, driven primarily by adhesion-related genes.

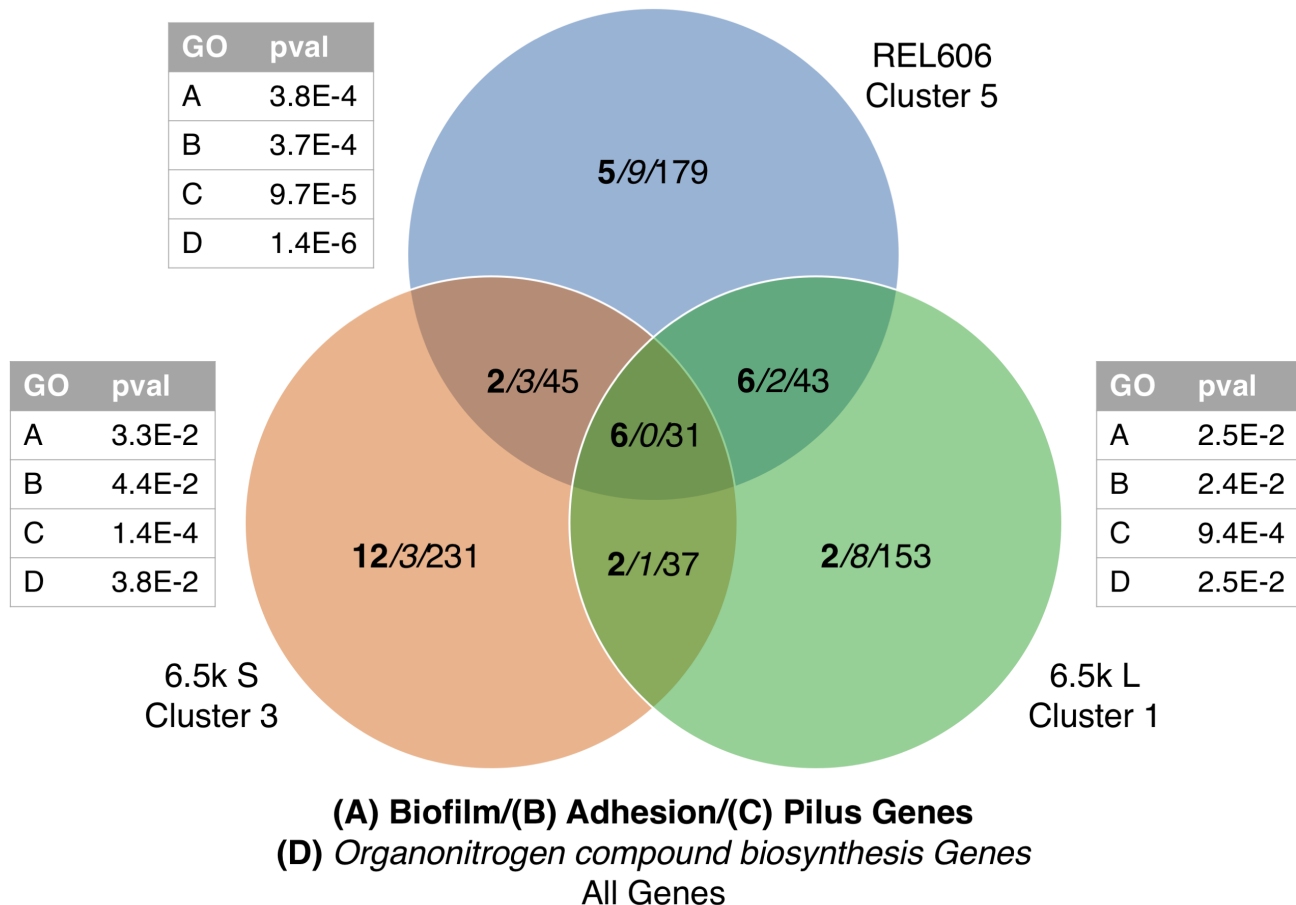

**Fig. S22.** Biofilm (GO:0043708)/adhesion (GO:0022610)/ pilus organization (GO:0043711)/ organonitrogen compound biosynthesis (GO:1901566) genes tend to appear in the same clusters across genetic backgrounds. P-values are post-FDR correction.

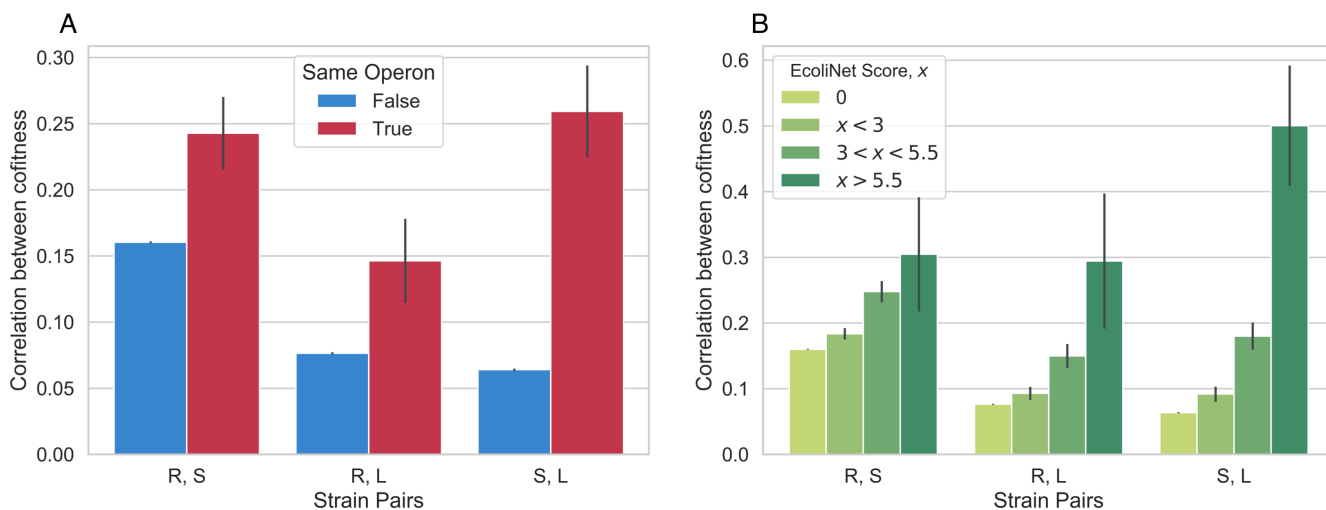

**Fig. S23.** Correlations between cofitness increase **(A)** when genes are in the same operon and **(B)** with EcoliNet (58) score. A score of 0 indicates that the gene pair is not connected in EcoliNet, i.e. a node distance greater than 1.



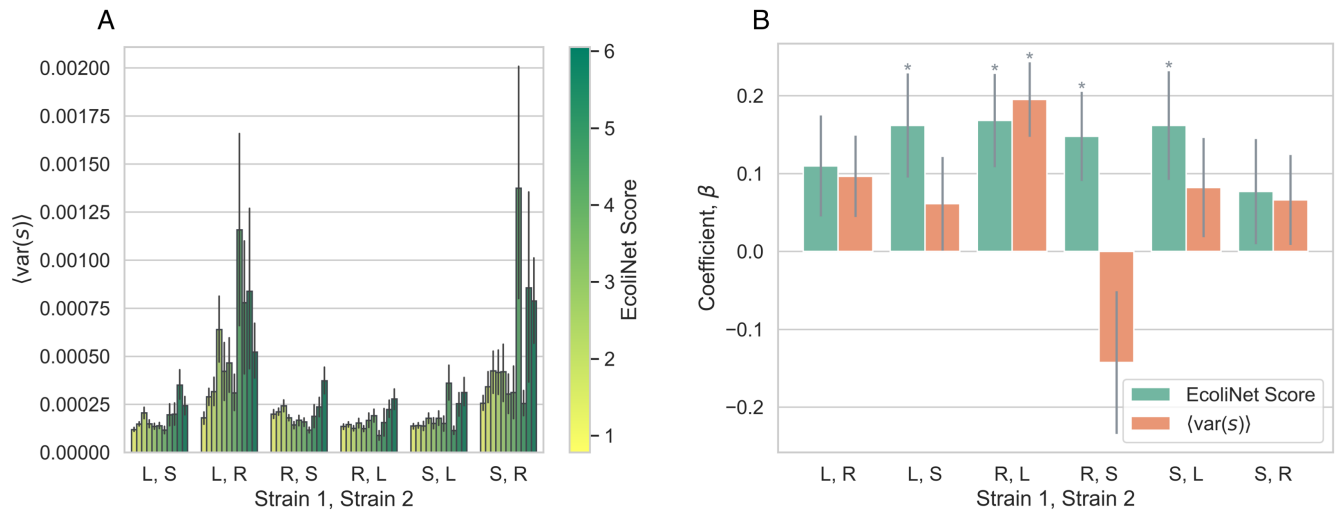

**Fig. S24.** Variance in fitness effect across environment does not fully explain correlation between EcoliNet score and probability that two genes will be in the same cluster across strains. **(A)** Covariation of EcoliNet scores and variations in fitness effects in some strain pairs. The observed covariation is interesting in and of itself, as it suggests that more strongly interacting genes tend to have a larger variation in fitness effects across environments. **(B)** A standard multiple logistic regression with both fitness variance (in strain 2) and EcoliNet score as covariates, with response variable as the probability two genes are in the same cluster in strain 2, if they were together in strain 1. For most strain pairs, the regression reveals that the correlation reported in Figure 4D still holds after controlling for variation in fitness effects. \*  $p < 0.05$ . See section S4.2 for model details.

### Probability two genes are in the same cluster in strain 2, if they were together in strain 1

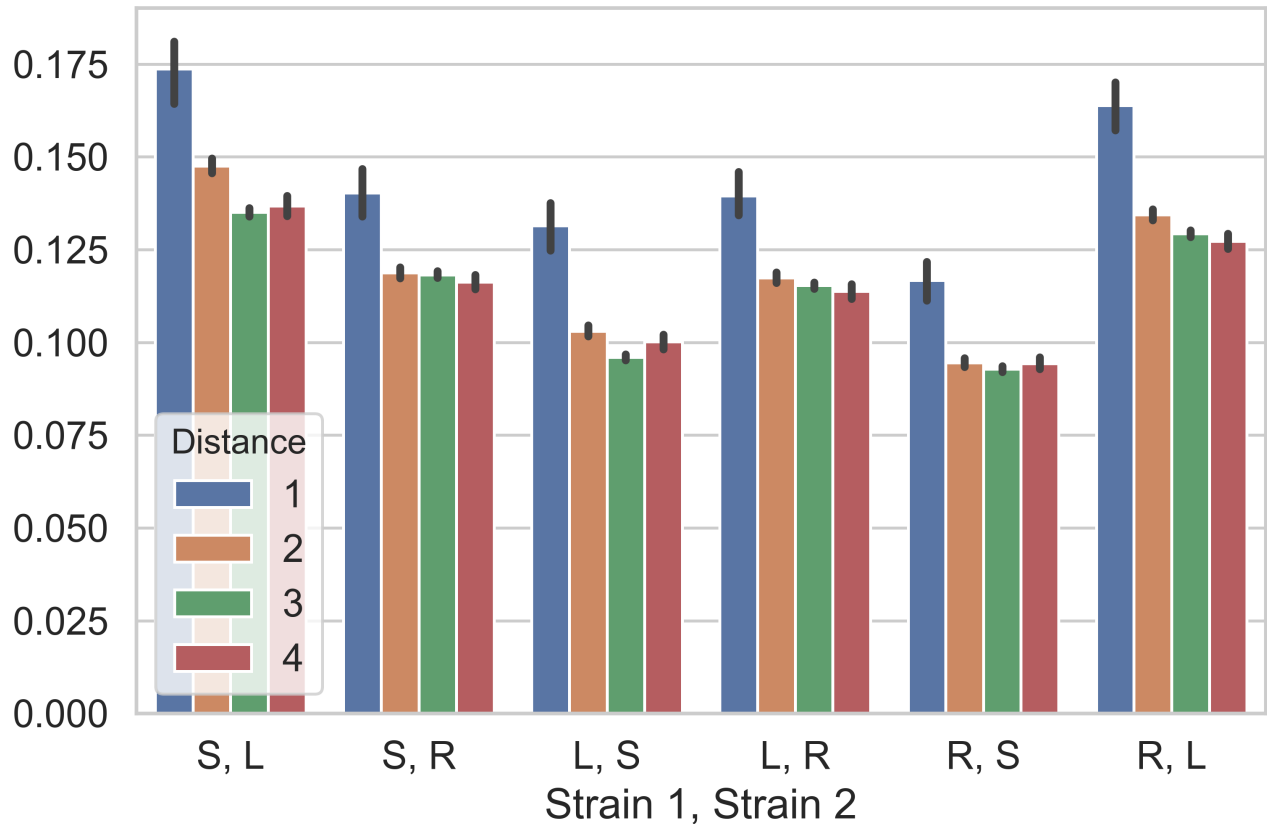

**Fig. S25.** Shortest distance between genes in EcoliNet (58) predicts if genes stay correlated across genetic background

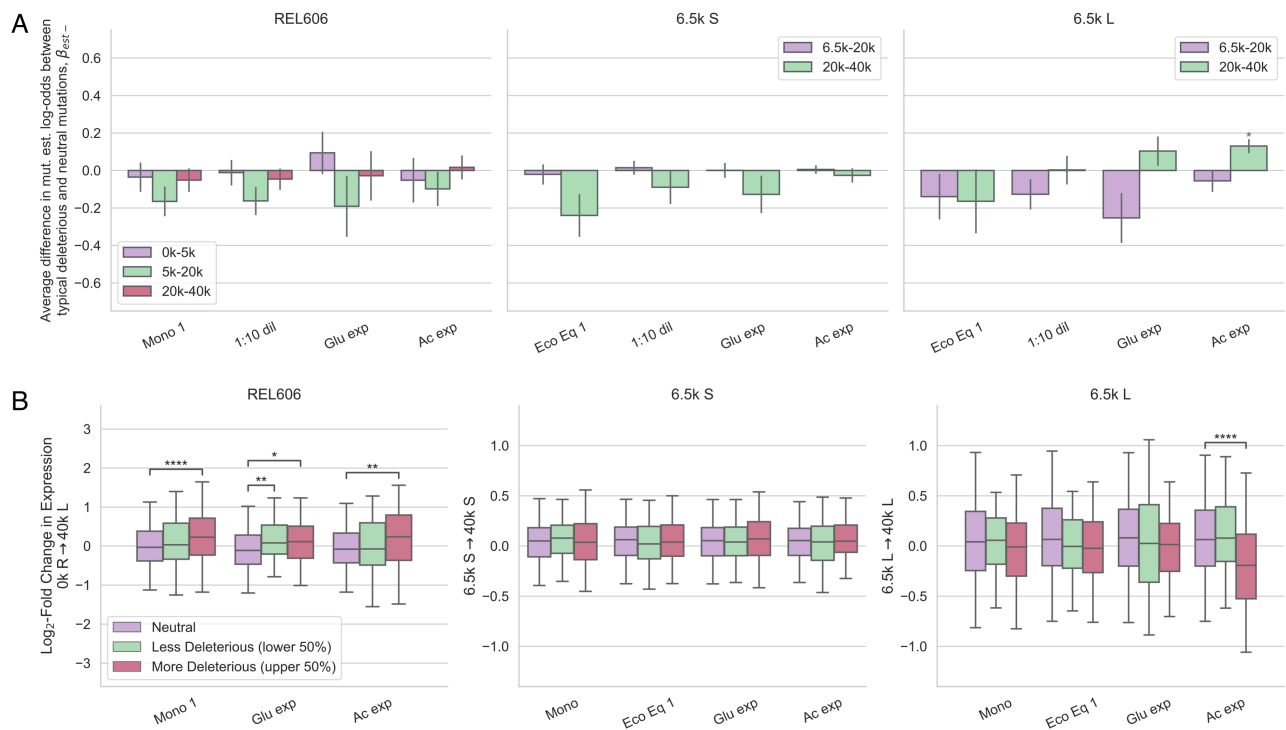

**Fig. S26.** Relationship between deleterious mutations and evolutionary outcomes. **(A)** Deleterious fitness effects generally do not predict which genes will mutate, with the one exception that L seems more likely than random to get mutations in genes with deleterious acetate knockout fitness. **(B)** In REL606, deleterious knockout fitness effects are predictive of increased gene expression across all tested environments. Asterisks denote coefficients/comparisons that are significantly different than 0 (\*  $p < 0.05$ , \*\*  $p < 0.01$ , \*\*\*  $p < 0.001$ ).

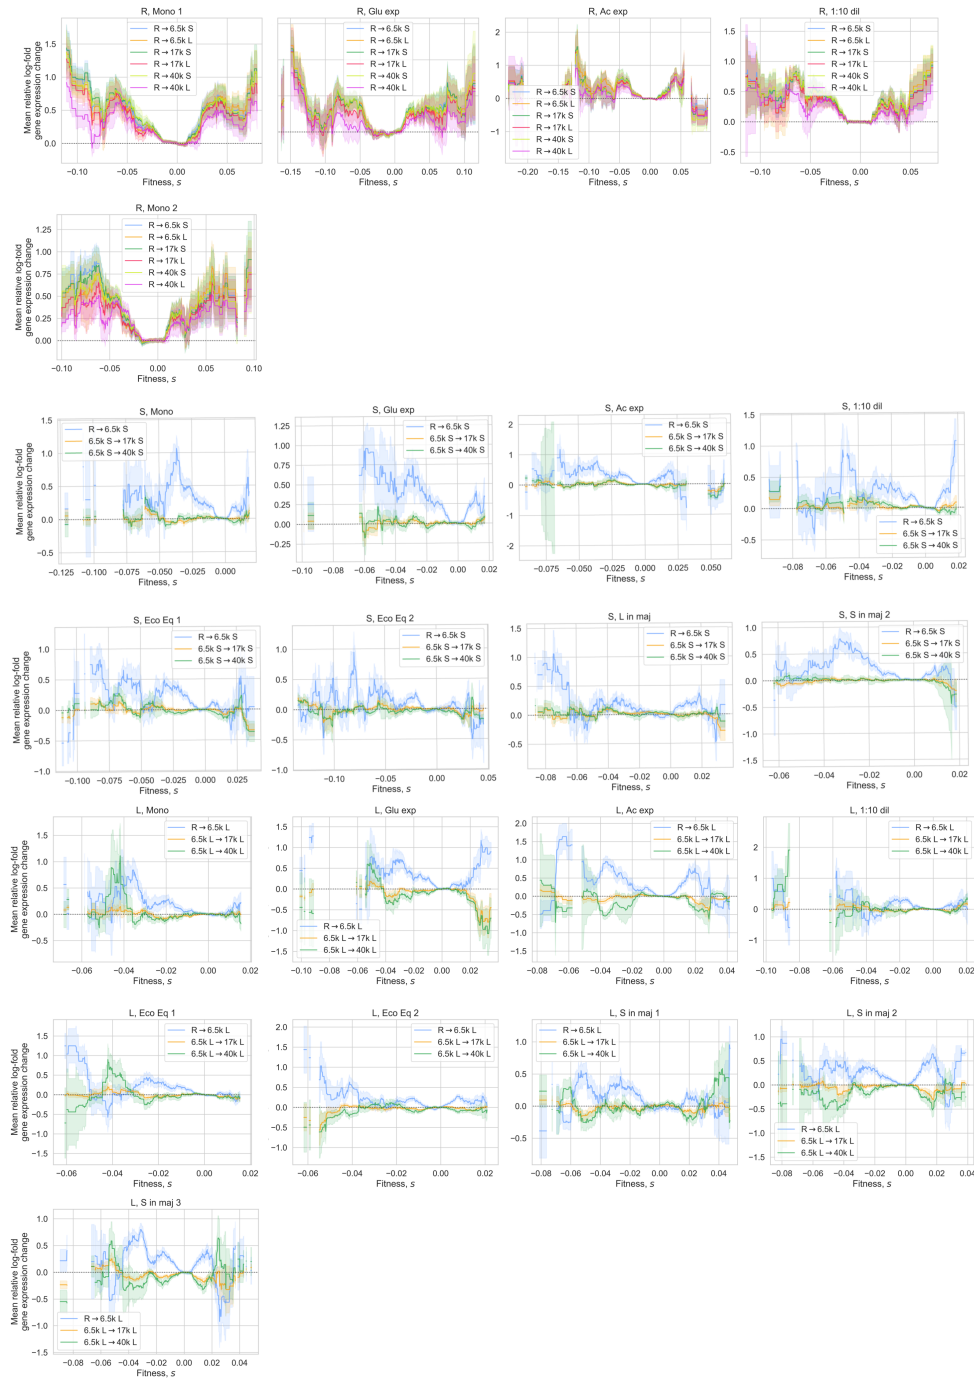

**Fig. S27.** Relationship between fitness effects and log-fold gene expression change for all experiments, relative to the average change for neutral knockouts. Lines show mean gene expression change as a function of fitness effect ( $\pm$  standard error), with a  $\pm 0.01$  moving average.

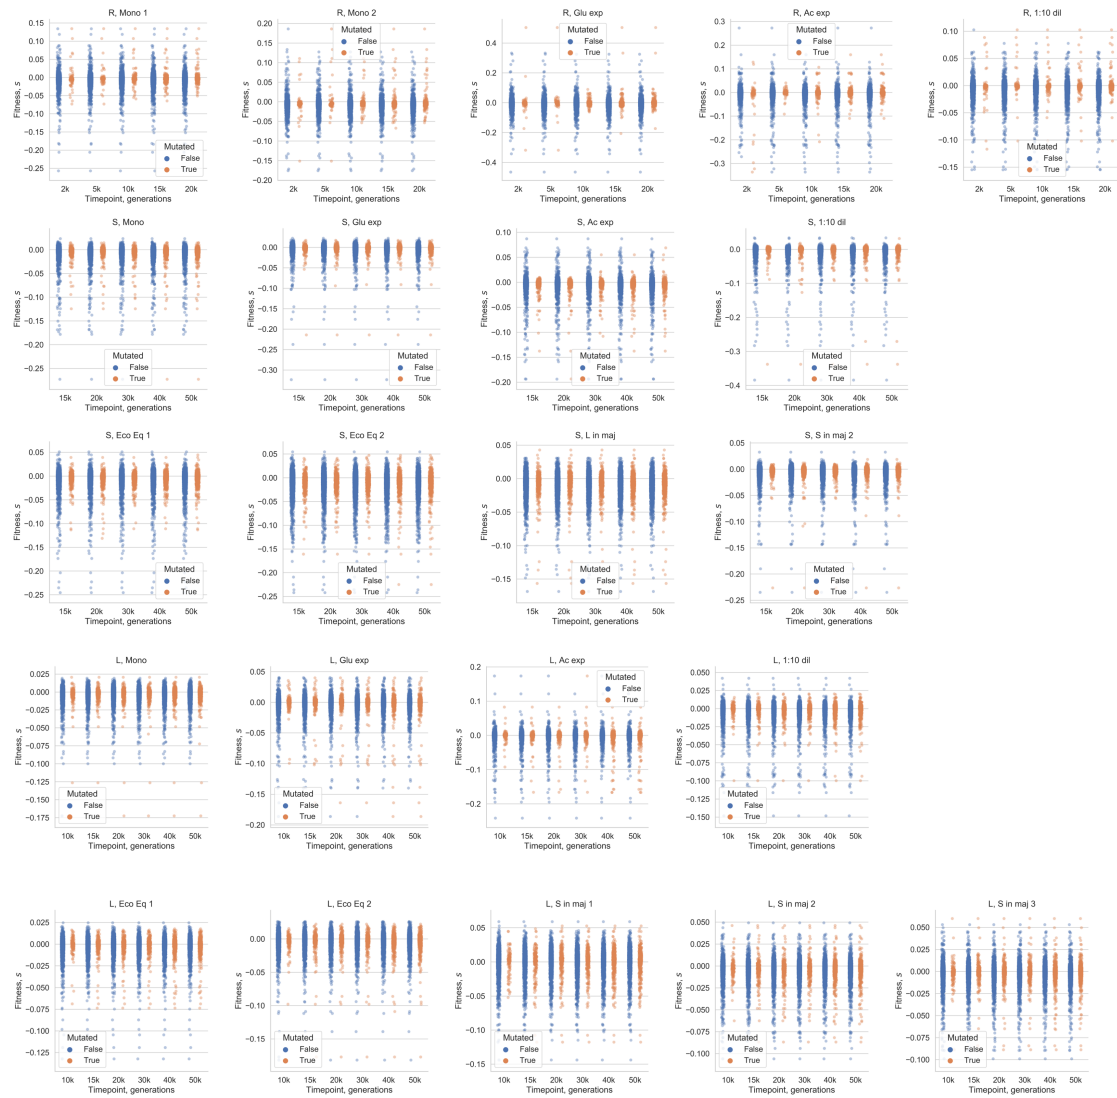

Fig. S28. Establishment of a mutation in a gene by its knockout fitness.



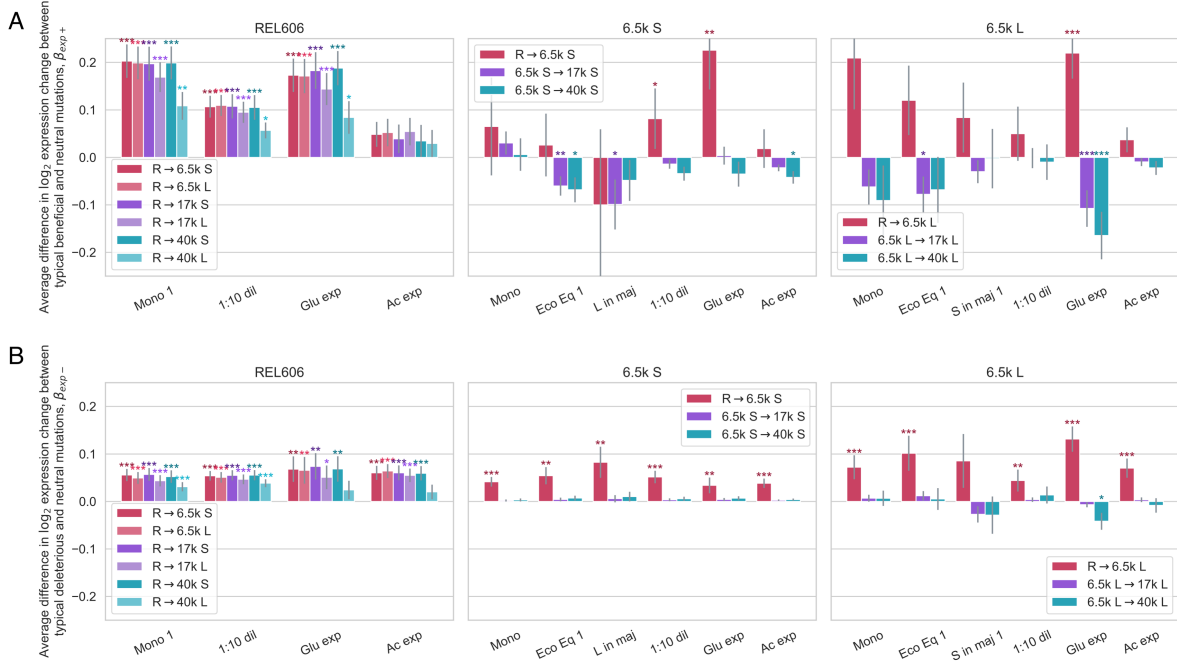

**Fig. S29.** Linear model to explore correlation of gene expression changes with knockout fitness effects, comparing neutral to (a) beneficial and (b) deleterious knockouts. Asterisks denote coefficients that are significantly different than 0 (FDR correction; \*  $p < 0.05$ , \*\*  $p < 0.01$ , \*\*\*  $p < 0.001$ ).

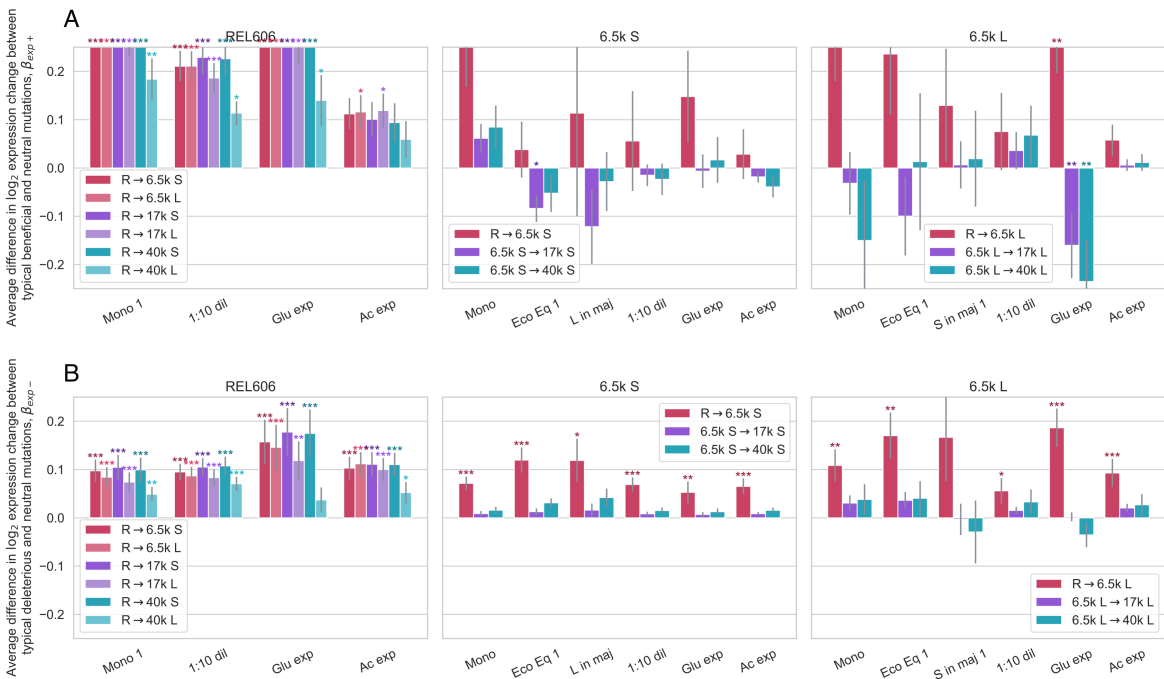

**Fig. S30.** Restricting analysis of Figure S29 to exclude poorly expressed genes (bottom 50%) does not qualitatively change results of analysis, when comparing neutral to (a) beneficial and (b) deleterious knockouts.

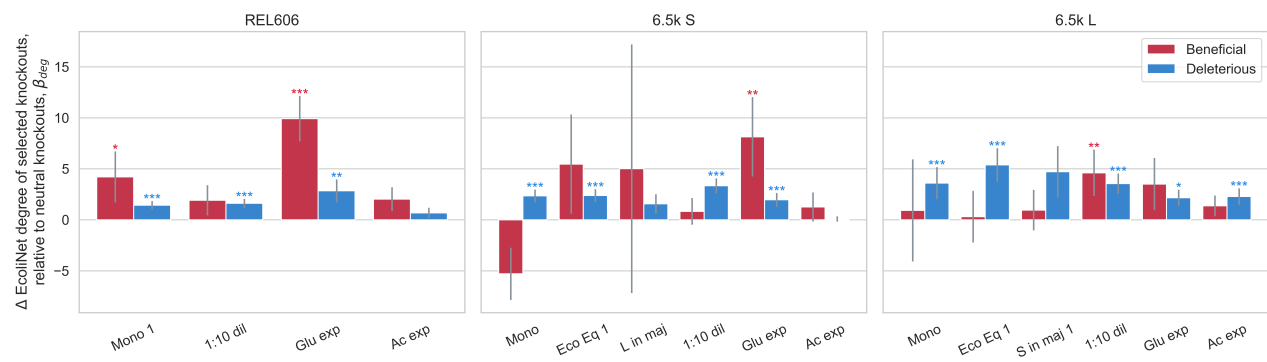

**Fig. S31.** Fitness effects predict EcoliNet node degree. Deleterious knockouts across environments are more likely to have a high degree compared to neutral knockouts. The same general pattern appears for beneficial knockouts, although less clearly. Linear model fit with ordinary least squares; normalized analogous to model in section S4.4. Asterisks denote coefficients that are significantly different than 0 (\*  $p < 0.05$ , \*\*  $p < 0.01$ , \*\*\*  $p < 0.001$ ).
